# Supplementary material
Source: MDPI journal article supplement (https://www.mdpi.com/2073-4433/15/1/45)
Supplement: s1 [file s1]

## **Supplementary Information (SI)**

**for**

### **Particle number size distribution in three different microenvironments of London**

Gopinath Kalaiarasan<sup>1</sup>, Prashant Kumar<sup>1,2,\*</sup>, Mamatha Tomson<sup>1</sup>, Juan C. Zavala-Reyes<sup>3</sup>,  
Alexandra E. Porter<sup>4</sup>, Gloria Young<sup>4</sup>, Hisham Abubakar-Waziri<sup>5</sup>, Christopher C. Pain<sup>6</sup>, Ian  
Adcock<sup>5</sup>, Sharon Mumby<sup>5</sup>, Claire Dilliway<sup>6</sup>, Fangxing Fang<sup>6</sup>, Rossella Arcucci<sup>6</sup>, Kian Fan  
Chung<sup>5</sup>

<sup>1</sup>Global Centre for Clean Air Research (GCARE), School of Sustainability, Civil and  
Environmental Engineering, Faculty of Engineering and Physical Sciences, University of  
Surrey, Guildford GU2 7XH, UK

<sup>2</sup>Institute for Sustainability, University of Surrey, Guildford GU2 7XH, UK;  
p.kumar@surrey.ac.uk; prashant.kumar@cantab.net

<sup>3</sup>Eccscuela Nacional de Estudios Superiores–Mérida, Universidad Nacional Autónoma de  
México, 97357 Mérida, Yucatán, México

<sup>4</sup>Department of Materials Science and Engineering, Imperial College London, London SW7  
2AZ, UK

<sup>5</sup>National Heart & Lung Institute, Imperial College London, London SW3 6LY, UK

<sup>6</sup>Department of Earth Science and Engineering, Imperial College London, London SW7 2AZ,  
UK

---

\*Corresponding author. Address as above. E-mail addresses: P.Kumar@surrey.ac.uk,  
[Prashant.Kumar@cantab.net](mailto:Prashant.Kumar@cantab.net)

**Table S1.** Aerodynamic diameter intervals in each impactor stage and their respective geometric mean aerodynamic diameters.

| <b>Impactor stage</b> | <b>Aerodynamic diameter range (µm)</b> | <b>Geo. Mean. aerodynamic diameter (µm)</b> |
|-----------------------|----------------------------------------|---------------------------------------------|
| 1                     | 0.006 - 0.016                          | 0.010                                       |
| 2                     | 0.016 - 0.030                          | 0.022                                       |
| 3                     | 0.030 - 0.054                          | 0.040                                       |
| 4                     | 0.054 - 0.094                          | 0.071                                       |
| 5                     | 0.094 - 0.15                           | 0.12                                        |
| 6                     | 0.15 - 0.25                            | 0.19                                        |
| 7                     | 0.25 - 0.38                            | 0.31                                        |
| 8                     | 0.38 - 0.60                            | 0.48                                        |
| 9                     | 0.60 - 0.94                            | 0.75                                        |
| 10                    | 0.94 - 1.6                             | 1.2                                         |
| 11                    | 1.6 - 2.5                              | 2.0                                         |
| 12                    | 2.5 - 3.6                              | 3.0                                         |
| 13                    | 3.6 - 5.3                              | 4.4                                         |
| 14                    | 5.3 - 10                               | 7.3                                         |

**Table S2.** Mean RDD at all three sites for the extrathoracic region (ET), tracheobronchial region (TB), and alveolar region (AL), for both rest and exercise activities for females.

| Indoor (Rest) RDD      |                        |                        |                        |                        |                        |
|------------------------|------------------------|------------------------|------------------------|------------------------|------------------------|
| ET region              | ET region              | TB region              | TB region              | AL region              | AL region              |
| Mean                   | SD                     | Mean                   | SD                     | Mean                   | SD                     |
| (# min <sup>-1</sup> ) |
| 5.19E+06               | 3.76E+06               | 6.53E+06               | 4.73E+06               | 1.10E+07               | 8.00E+06               |
| 1.02E+06               | 6.14E+05               | 1.73E+06               | 1.04E+06               | 5.19E+06               | 3.12E+06               |
| 3.14E+05               | 1.85E+05               | 5.85E+05               | 3.45E+05               | 2.45E+06               | 1.44E+06               |
| 1.22E+05               | 8.58E+04               | 1.97E+05               | 1.39E+05               | 9.87E+05               | 6.97E+05               |
| 6.75E+04               | 5.61E+04               | 6.52E+04               | 5.41E+04               | 3.64E+05               | 3.02E+05               |
| 5.26E+04               | 4.98E+04               | 1.73E+04               | 1.64E+04               | 1.26E+05               | 1.20E+05               |
| 3.78E+04               | 3.42E+04               | 3.86E+03               | 3.50E+03               | 4.77E+04               | 4.32E+04               |
| 3.28E+04               | 2.95E+04               | 2.33E+03               | 2.09E+03               | 2.79E+04               | 2.51E+04               |
| 7.75E+03               | 6.34E+03               | 6.68E+02               | 5.47E+02               | 4.36E+03               | 3.57E+03               |
| 6.13E+03               | 3.36E+03               | 6.07E+02               | 3.33E+02               | 2.06E+03               | 1.13E+03               |
| 2.20E+03               | 1.60E+03               | 2.09E+02               | 1.52E+02               | 4.39E+02               | 3.18E+02               |

|                        |                        |                        |                        |                        |                        |
|------------------------|------------------------|------------------------|------------------------|------------------------|------------------------|
| 5.86E+02               | 4.81E+02               | 4.69E+01               | 3.85E+01               | 7.38E+01               | 6.06E+01               |
| 4.51E+02               | 3.21E+02               | 2.66E+01               | 1.89E+01               | 3.51E+01               | 2.50E+01               |
| 1.51E+02               | 1.15E+02               | 4.75E+00               | 3.64E+00               | 5.83E+00               | 4.46E+00               |
| 8.90E+07               | 5.44E+07               | 1.67E+06               | 1.02E+06               | 2.12E+06               | 1.30E+06               |
| Indoor (Exercise)      |                        |                        |                        |                        |                        |
| ET region              | ET region              | TB region              | TB region              | AL region              | AL region              |
| Mean                   | SD                     | Mean                   | SD                     | Mean                   | SD                     |
| (# min <sup>-1</sup> ) |
| 3.59E+07               | 2.60E+07               | 4.52E+07               | 3.28E+07               | 7.65E+07               | 5.54E+07               |
| 7.07E+06               | 4.26E+06               | 1.20E+07               | 7.22E+06               | 3.59E+07               | 2.16E+07               |
| 2.18E+06               | 1.28E+06               | 4.05E+06               | 2.39E+06               | 1.70E+07               | 9.99E+06               |
| 8.42E+05               | 5.94E+05               | 1.37E+06               | 9.63E+05               | 6.84E+06               | 4.83E+06               |
| 4.68E+05               | 3.89E+05               | 4.52E+05               | 3.75E+05               | 2.52E+06               | 2.09E+06               |
| 3.64E+05               | 3.45E+05               | 1.20E+05               | 1.14E+05               | 8.76E+05               | 8.31E+05               |
| 2.62E+05               | 2.37E+05               | 2.68E+04               | 2.42E+04               | 3.31E+05               | 2.99E+05               |
| 2.27E+05               | 2.05E+05               | 1.61E+04               | 1.45E+04               | 1.93E+05               | 1.74E+05               |
| 5.37E+04               | 4.39E+04               | 4.63E+03               | 3.79E+03               | 3.02E+04               | 2.47E+04               |
| 4.25E+04               | 2.33E+04               | 4.21E+03               | 2.31E+03               | 1.43E+04               | 7.84E+03               |

|                        |                        |                        |                        |                        |                        |
|------------------------|------------------------|------------------------|------------------------|------------------------|------------------------|
| 1.53E+04               | 1.11E+04               | 1.45E+03               | 1.05E+03               | 3.04E+03               | 2.21E+03               |
| 4.06E+03               | 3.33E+03               | 3.25E+02               | 2.67E+02               | 5.11E+02               | 4.20E+02               |
| 3.12E+03               | 2.23E+03               | 1.84E+02               | 1.31E+02               | 2.43E+02               | 1.73E+02               |
| 1.04E+03               | 7.99E+02               | 3.29E+01               | 2.52E+01               | 4.04E+01               | 3.09E+01               |
| 6.16E+08               | 3.77E+08               | 1.15E+07               | 7.05E+06               | 1.47E+07               | 8.98E+06               |
| Traffic (rest)         |                        |                        |                        |                        |                        |
| ET region              | ET region              | TB region              | TB region              | AL region              | AL region              |
| Mean                   | SD                     | Mean                   | SD                     | Mean                   | SD                     |
| (# min <sup>-1</sup> ) |
| 3.73E+07               | 1.24E+08               | 4.70E+07               | 1.56E+08               | 7.95E+07               | 2.63E+08               |
| 1.63E+06               | 1.01E+06               | 2.76E+06               | 1.71E+06               | 8.28E+06               | 5.13E+06               |
| 4.51E+05               | 3.12E+05               | 8.40E+05               | 5.81E+05               | 3.51E+06               | 2.43E+06               |
| 1.64E+05               | 1.28E+05               | 2.66E+05               | 2.08E+05               | 1.33E+06               | 1.04E+06               |
| 7.70E+04               | 6.24E+04               | 7.43E+04               | 6.03E+04               | 4.15E+05               | 3.36E+05               |
| 5.22E+04               | 3.98E+04               | 1.72E+04               | 1.31E+04               | 1.26E+05               | 9.58E+04               |
| 3.89E+04               | 3.05E+04               | 3.98E+03               | 3.12E+03               | 4.92E+04               | 3.85E+04               |
| 1.83E+04               | 1.36E+04               | 1.30E+03               | 9.66E+02               | 1.56E+04               | 1.16E+04               |
| 1.25E+04               | 8.05E+03               | 1.08E+03               | 6.94E+02               | 7.06E+03               | 4.53E+03               |

|                        |                        |                        |                        |                        |                        |
|------------------------|------------------------|------------------------|------------------------|------------------------|------------------------|
| 8.33E+03               | 4.16E+03               | 8.25E+02               | 4.12E+02               | 2.81E+03               | 1.40E+03               |
| 3.83E+03               | 2.31E+03               | 3.64E+02               | 2.20E+02               | 7.63E+02               | 4.61E+02               |
| 1.75E+03               | 1.75E+03               | 1.40E+02               | 1.40E+02               | 2.20E+02               | 2.21E+02               |
| 1.07E+03               | 1.24E+03               | 6.32E+01               | 7.30E+01               | 8.35E+01               | 9.64E+01               |
| 7.58E+02               | 7.69E+02               | 2.39E+01               | 2.43E+01               | 2.93E+01               | 2.97E+01               |
| 3.69E+08               | 1.00E+09               | 6.91E+06               | 1.87E+07               | 8.80E+06               | 2.38E+07               |
| Traffic (exercise)     |                        |                        |                        |                        |                        |
| ET region              | ET region              | TB region              | TB region              | AL region              | AL region              |
| Mean                   | SD                     | Mean                   | SD                     | Mean                   | SD                     |
| (# min <sup>-1</sup> ) |
| 2.59E+08               | 8.56E+08               | 3.25E+08               | 1.08E+09               | 5.51E+08               | 1.82E+09               |
| 1.13E+07               | 6.99E+06               | 1.91E+07               | 1.19E+07               | 5.73E+07               | 3.56E+07               |
| 3.13E+06               | 2.16E+06               | 5.82E+06               | 4.03E+06               | 2.43E+07               | 1.68E+07               |
| 1.14E+06               | 8.88E+05               | 1.85E+06               | 1.44E+06               | 9.25E+06               | 7.21E+06               |
| 5.34E+05               | 4.33E+05               | 5.15E+05               | 4.18E+05               | 2.88E+06               | 2.33E+06               |
| 3.62E+05               | 2.76E+05               | 1.19E+05               | 9.10E+04               | 8.70E+05               | 6.64E+05               |
| 2.70E+05               | 2.11E+05               | 2.76E+04               | 2.16E+04               | 3.41E+05               | 2.67E+05               |
| 1.27E+05               | 9.44E+04               | 9.00E+03               | 6.70E+03               | 1.08E+05               | 8.02E+04               |

|                        |                        |                        |                        |                        |                        |
|------------------------|------------------------|------------------------|------------------------|------------------------|------------------------|
| 8.69E+04               | 5.58E+04               | 7.49E+03               | 4.81E+03               | 4.89E+04               | 3.14E+04               |
| 5.77E+04               | 2.88E+04               | 5.72E+03               | 2.85E+03               | 1.94E+04               | 9.70E+03               |
| 2.65E+04               | 1.60E+04               | 2.52E+03               | 1.52E+03               | 5.29E+03               | 3.19E+03               |
| 1.21E+04               | 1.21E+04               | 9.71E+02               | 9.73E+02               | 1.53E+03               | 1.53E+03               |
| 7.43E+03               | 8.58E+03               | 4.38E+02               | 5.06E+02               | 5.79E+02               | 6.68E+02               |
| 5.25E+03               | 5.33E+03               | 1.66E+02               | 1.68E+02               | 2.03E+02               | 2.06E+02               |
| 2.56E+09               | 6.93E+09               | 4.79E+07               | 1.30E+08               | 6.10E+07               | 1.65E+08               |
| Park (rest)            |                        |                        |                        |                        |                        |
| ET region              | ET region              | TB region              | TB region              | AL region              | AL region              |
| Mean                   | SD                     | Mean                   | SD                     | Mean                   | SD                     |
| (# min <sup>-1</sup> ) |
| 2.92E+06               | 3.68E+06               | 3.68E+06               | 4.63E+06               | 6.23E+06               | 7.84E+06               |
| 4.10E+05               | 5.28E+05               | 6.96E+05               | 8.97E+05               | 2.09E+06               | 2.69E+06               |
| 1.17E+05               | 1.46E+05               | 2.19E+05               | 2.72E+05               | 9.14E+05               | 1.14E+06               |
| 4.31E+04               | 5.54E+04               | 6.98E+04               | 8.97E+04               | 3.50E+05               | 4.50E+05               |
| 1.70E+04               | 2.27E+04               | 1.64E+04               | 2.19E+04               | 9.14E+04               | 1.22E+05               |
| 1.18E+04               | 1.57E+04               | 3.90E+03               | 5.19E+03               | 2.84E+04               | 3.78E+04               |
| 9.09E+03               | 1.23E+04               | 9.29E+02               | 1.26E+03               | 1.15E+04               | 1.56E+04               |

|                        |                        |                        |                        |                        |                        |
|------------------------|------------------------|------------------------|------------------------|------------------------|------------------------|
| 8.61E+03               | 1.67E+04               | 6.11E+02               | 1.19E+03               | 7.32E+03               | 1.42E+04               |
| 2.38E+03               | 5.20E+03               | 2.05E+02               | 4.49E+02               | 1.34E+03               | 2.93E+03               |
| 2.27E+03               | 2.71E+03               | 2.25E+02               | 2.68E+02               | 7.65E+02               | 9.12E+02               |
| 9.71E+02               | 1.34E+03               | 9.23E+01               | 1.28E+02               | 1.94E+02               | 2.68E+02               |
| 3.16E+02               | 5.55E+02               | 2.53E+01               | 4.44E+01               | 3.98E+01               | 6.99E+01               |
| 6.78E+01               | 5.50E+01               | 4.00E+00               | 3.24E+00               | 5.28E+00               | 4.28E+00               |
| 3.10E+02               | 1.34E+03               | 9.78E+00               | 4.22E+01               | 1.20E+01               | 5.17E+01               |
| 4.02E+07               | 5.04E+07               | 7.53E+05               | 9.44E+05               | 9.59E+05               | 1.20E+06               |
| Park (exercise)        |                        |                        |                        |                        |                        |
| ET region              | ET region              | TB region              | TB region              | AL region              | AL region              |
| Mean                   | SD                     | Mean                   | SD                     | Mean                   | SD                     |
| (# min <sup>-1</sup> ) |
| 2.03E+07               | 2.55E+07               | 2.55E+07               | 3.21E+07               | 4.32E+07               | 5.43E+07               |
| 2.84E+06               | 3.66E+06               | 4.82E+06               | 6.21E+06               | 1.44E+07               | 1.86E+07               |
| 8.13E+05               | 1.01E+06               | 1.51E+06               | 1.89E+06               | 6.33E+06               | 7.89E+06               |
| 2.99E+05               | 3.84E+05               | 4.84E+05               | 6.22E+05               | 2.42E+06               | 3.12E+06               |
| 1.18E+05               | 1.57E+05               | 1.13E+05               | 1.52E+05               | 6.33E+05               | 8.47E+05               |
| 8.19E+04               | 1.09E+05               | 2.70E+04               | 3.59E+04               | 1.97E+05               | 2.62E+05               |



|          |          |          |          |          |          |
|----------|----------|----------|----------|----------|----------|
| 6.30E+04 | 8.56E+04 | 6.44E+03 | 8.75E+03 | 7.96E+04 | 1.08E+05 |
| 5.97E+04 | 1.16E+05 | 4.23E+03 | 8.23E+03 | 5.07E+04 | 9.86E+04 |
| 1.65E+04 | 3.61E+04 | 1.42E+03 | 3.11E+03 | 9.27E+03 | 2.03E+04 |
| 1.57E+04 | 1.88E+04 | 1.56E+03 | 1.86E+03 | 5.30E+03 | 6.32E+03 |
| 6.73E+03 | 9.30E+03 | 6.39E+02 | 8.84E+02 | 1.34E+03 | 1.85E+03 |
| 2.19E+03 | 3.84E+03 | 1.75E+02 | 3.08E+02 | 2.76E+02 | 4.84E+02 |
| 4.70E+02 | 3.81E+02 | 2.77E+01 | 2.25E+01 | 3.66E+01 | 2.97E+01 |
| 2.15E+03 | 9.26E+03 | 6.78E+01 | 2.92E+02 | 8.30E+01 | 3.58E+02 |
| 2.79E+08 | 3.49E+08 | 5.22E+06 | 6.54E+06 | 6.65E+06 | 8.33E+06 |

**Table. S3.** The mean RDD of all three sites for the extrathoracic region (ET), tracheobronchial region (TB), and alveolar region (AL), for both the rest and exercise activities for males.

| Indoor (rest)          |                        |                        |                        |                        |                        |
|------------------------|------------------------|------------------------|------------------------|------------------------|------------------------|
| ET region              | ET region              | TB region              | TB region              | AL region              | AL region              |
| Mean                   | SD                     | Mean                   | SD                     | Mean                   | SD                     |
| (# min <sup>-1</sup> ) |
| 7.19E+06               | 5.21E+06               | 9.04E+06               | 6.55E+06               | 1.53E+07               | 1.11E+07               |
| 1.41E+06               | 8.51E+05               | 2.40E+06               | 1.44E+06               | 7.18E+06               | 4.33E+06               |
| 4.35E+05               | 2.56E+05               | 8.10E+05               | 4.77E+05               | 3.39E+06               | 2.00E+06               |

|                        |                        |                        |                        |                        |                        |
|------------------------|------------------------|------------------------|------------------------|------------------------|------------------------|
| 1.68E+05               | 1.19E+05               | 2.73E+05               | 1.93E+05               | 1.37E+06               | 9.65E+05               |
| 9.36E+04               | 7.77E+04               | 9.03E+04               | 7.50E+04               | 5.04E+05               | 4.19E+05               |
| 7.28E+04               | 6.90E+04               | 2.40E+04               | 2.28E+04               | 1.75E+05               | 1.66E+05               |
| 5.23E+04               | 4.74E+04               | 5.35E+03               | 4.84E+03               | 6.61E+04               | 5.98E+04               |
| 4.54E+04               | 4.09E+04               | 3.22E+03               | 2.90E+03               | 3.86E+04               | 3.48E+04               |
| 1.07E+04               | 8.79E+03               | 9.25E+02               | 7.58E+02               | 6.04E+03               | 4.95E+03               |
| 8.49E+03               | 4.65E+03               | 8.41E+02               | 4.61E+02               | 2.86E+03               | 1.57E+03               |
| 3.05E+03               | 2.21E+03               | 2.90E+02               | 2.10E+02               | 6.08E+02               | 4.41E+02               |
| 8.12E+02               | 6.67E+02               | 6.50E+01               | 5.34E+01               | 1.02E+02               | 8.40E+01               |
| 6.24E+02               | 4.45E+02               | 3.68E+01               | 2.62E+01               | 4.86E+01               | 3.46E+01               |
| 2.09E+02               | 1.60E+02               | 6.59E+00               | 5.04E+00               | 8.07E+00               | 6.18E+00               |
| 1.23E+08               | 7.54E+07               | 2.31E+06               | 1.41E+06               | 2.94E+06               | 1.80E+06               |
| Indoor (exercise)      |                        |                        |                        |                        |                        |
| ET region              | ET region              | TB region              | TB region              | AL region              | AL region              |
| Mean                   | SD                     | Mean                   | SD                     | Mean                   | SD                     |
| (# min <sup>-1</sup> ) |
| 4.01E+07               | 2.91E+07               | 5.05E+07               | 3.66E+07               | 8.54E+07               | 6.19E+07               |

|                |          |          |          |          |          |
|----------------|----------|----------|----------|----------|----------|
| 7.89E+06       | 4.75E+06 | 1.34E+07 | 8.06E+06 | 4.01E+07 | 2.41E+07 |
| 2.43E+06       | 1.43E+06 | 4.52E+06 | 2.66E+06 | 1.89E+07 | 1.11E+07 |
| 9.40E+05       | 6.63E+05 | 1.52E+06 | 1.08E+06 | 7.63E+06 | 5.39E+06 |
| 5.22E+05       | 4.34E+05 | 5.04E+05 | 4.19E+05 | 2.81E+06 | 2.34E+06 |
| 4.06E+05       | 3.85E+05 | 1.34E+05 | 1.27E+05 | 9.78E+05 | 9.27E+05 |
| 2.92E+05       | 2.64E+05 | 2.99E+04 | 2.70E+04 | 3.69E+05 | 3.34E+05 |
| 2.53E+05       | 2.28E+05 | 1.80E+04 | 1.62E+04 | 2.15E+05 | 1.94E+05 |
| 5.99E+04       | 4.90E+04 | 5.17E+03 | 4.23E+03 | 3.37E+04 | 2.76E+04 |
| 4.74E+04       | 2.60E+04 | 4.69E+03 | 2.57E+03 | 1.60E+04 | 8.75E+03 |
| 1.70E+04       | 1.23E+04 | 1.62E+03 | 1.17E+03 | 3.39E+03 | 2.46E+03 |
| 4.53E+03       | 3.72E+03 | 3.63E+02 | 2.98E+02 | 5.71E+02 | 4.69E+02 |
| 3.48E+03       | 2.48E+03 | 2.05E+02 | 1.46E+02 | 2.71E+02 | 1.93E+02 |
| 1.17E+03       | 8.91E+02 | 3.68E+01 | 2.81E+01 | 4.51E+01 | 3.45E+01 |
| 6.88E+08       | 4.21E+08 | 1.29E+07 | 7.87E+06 | 1.64E+07 | 1.00E+07 |
| Traffic (rest) |          |          |          |          |          |

| ET region              | ET region              | TB region              | TB region              | AL region              | AL region              |
|------------------------|------------------------|------------------------|------------------------|------------------------|------------------------|
| Mean                   | SD                     | Mean                   | SD                     | Mean                   | SD                     |
| (# min <sup>-1</sup> ) |
| 5.17E+07               | 1.71E+08               | 6.51E+07               | 2.15E+08               | 1.10E+08               | 3.65E+08               |
| 2.26E+06               | 1.40E+06               | 3.83E+06               | 2.37E+06               | 1.15E+07               | 7.11E+06               |
| 6.25E+05               | 4.33E+05               | 1.16E+06               | 8.05E+05               | 4.87E+06               | 3.37E+06               |
| 2.28E+05               | 1.77E+05               | 3.69E+05               | 2.88E+05               | 1.85E+06               | 1.44E+06               |
| 1.07E+05               | 8.65E+04               | 1.03E+05               | 8.35E+04               | 5.75E+05               | 4.66E+05               |
| 7.23E+04               | 5.51E+04               | 2.39E+04               | 1.82E+04               | 1.74E+05               | 1.33E+05               |
| 5.40E+04               | 4.22E+04               | 5.52E+03               | 4.32E+03               | 6.82E+04               | 5.33E+04               |
| 2.54E+04               | 1.89E+04               | 1.80E+03               | 1.34E+03               | 2.16E+04               | 1.60E+04               |
| 1.74E+04               | 1.11E+04               | 1.50E+03               | 9.61E+02               | 9.78E+03               | 6.28E+03               |
| 1.15E+04               | 5.76E+03               | 1.14E+03               | 5.70E+02               | 3.89E+03               | 1.94E+03               |
| 5.31E+03               | 3.20E+03               | 5.04E+02               | 3.04E+02               | 1.06E+03               | 6.38E+02               |
| 2.42E+03               | 2.43E+03               | 1.94E+02               | 1.95E+02               | 3.05E+02               | 3.06E+02               |
| 1.49E+03               | 1.72E+03               | 8.76E+01               | 1.01E+02               | 1.16E+02               | 1.34E+02               |
| 1.05E+03               | 1.06E+03               | 3.31E+01               | 3.36E+01               | 4.06E+01               | 4.12E+01               |

|                        |                        |                        |                        |                        |                        |
|------------------------|------------------------|------------------------|------------------------|------------------------|------------------------|
| 5.12E+08               | 1.38E+09               | 9.58E+06               | 2.59E+07               | 1.22E+07               | 3.30E+07               |
| Traffic (exercise)     |                        |                        |                        |                        |                        |
| ET region              | ET region              | TB region              | TB region              | AL region              | AL region              |
| Mean                   | SD                     | Mean                   | SD                     | Mean                   | SD                     |
| (# min <sup>-1</sup> ) |
| 2.89E+08               | 9.56E+08               | 3.63E+08               | 1.20E+09               | 6.15E+08               | 2.04E+09               |
| 1.26E+07               | 7.81E+06               | 2.14E+07               | 1.32E+07               | 6.40E+07               | 3.97E+07               |
| 3.49E+06               | 2.41E+06               | 6.49E+06               | 4.49E+06               | 2.72E+07               | 1.88E+07               |
| 1.27E+06               | 9.91E+05               | 2.06E+06               | 1.61E+06               | 1.03E+07               | 8.04E+06               |
| 5.95E+05               | 4.83E+05               | 5.75E+05               | 4.66E+05               | 3.21E+06               | 2.60E+06               |
| 4.03E+05               | 3.08E+05               | 1.33E+05               | 1.02E+05               | 9.71E+05               | 7.41E+05               |
| 3.01E+05               | 2.36E+05               | 3.08E+04               | 2.41E+04               | 3.81E+05               | 2.98E+05               |
| 1.42E+05               | 1.05E+05               | 1.00E+04               | 7.47E+03               | 1.20E+05               | 8.95E+04               |
| 9.70E+04               | 6.22E+04               | 8.36E+03               | 5.36E+03               | 5.46E+04               | 3.50E+04               |
| 6.44E+04               | 3.21E+04               | 6.38E+03               | 3.18E+03               | 2.17E+04               | 1.08E+04               |
| 2.96E+04               | 1.79E+04               | 2.81E+03               | 1.70E+03               | 5.90E+03               | 3.56E+03               |
| 1.35E+04               | 1.36E+04               | 1.08E+03               | 1.09E+03               | 1.70E+03               | 1.71E+03               |

|                        |                        |                        |                        |                        |                        |
|------------------------|------------------------|------------------------|------------------------|------------------------|------------------------|
| 8.30E+03               | 9.58E+03               | 4.89E+02               | 5.64E+02               | 6.46E+02               | 7.46E+02               |
| 5.86E+03               | 5.94E+03               | 1.85E+02               | 1.88E+02               | 2.27E+02               | 2.30E+02               |
| 2.86E+09               | 7.73E+09               | 5.34E+07               | 1.45E+08               | 6.81E+07               | 1.84E+08               |
| Park (rest)            |                        |                        |                        |                        |                        |
| ET region              | ET region              | TB region              | TB region              | AL region              | AL region              |
| Mean                   | SD                     | Mean                   | SD                     | Mean                   | SD                     |
| (# min <sup>-1</sup> ) |
| 4.05E+06               | 5.10E+06               | 5.10E+06               | 6.42E+06               | 8.63E+06               | 1.09E+07               |
| 5.68E+05               | 7.32E+05               | 9.64E+05               | 1.24E+06               | 2.89E+06               | 3.72E+06               |
| 1.63E+05               | 2.03E+05               | 3.03E+05               | 3.77E+05               | 1.27E+06               | 1.58E+06               |
| 5.97E+04               | 7.67E+04               | 9.68E+04               | 1.24E+05               | 4.85E+05               | 6.23E+05               |
| 2.35E+04               | 3.14E+04               | 2.27E+04               | 3.03E+04               | 1.27E+05               | 1.69E+05               |
| 1.64E+04               | 2.18E+04               | 5.41E+03               | 7.18E+03               | 3.94E+04               | 5.24E+04               |
| 1.26E+04               | 1.71E+04               | 1.29E+03               | 1.75E+03               | 1.59E+04               | 2.16E+04               |
| 1.19E+04               | 2.32E+04               | 8.46E+02               | 1.65E+03               | 1.01E+04               | 1.97E+04               |
| 3.29E+03               | 7.21E+03               | 2.84E+02               | 6.21E+02               | 1.85E+03               | 4.06E+03               |
| 3.15E+03               | 3.75E+03               | 3.12E+02               | 3.71E+02               | 1.06E+03               | 1.26E+03               |

|                        |                        |                        |                        |                        |                        |
|------------------------|------------------------|------------------------|------------------------|------------------------|------------------------|
| 1.35E+03               | 1.86E+03               | 1.28E+02               | 1.77E+02               | 2.68E+02               | 3.71E+02               |
| 4.37E+02               | 7.69E+02               | 3.50E+01               | 6.16E+01               | 5.51E+01               | 9.68E+01               |
| 9.40E+01               | 7.62E+01               | 5.54E+00               | 4.49E+00               | 7.32E+00               | 5.93E+00               |
| 4.29E+02               | 1.85E+03               | 1.35E+01               | 5.84E+01               | 1.66E+01               | 7.16E+01               |
| 5.58E+07               | 6.99E+07               | 1.04E+06               | 1.31E+06               | 1.33E+06               | 1.66E+06               |
| Park (exercise)        |                        |                        |                        |                        |                        |
| ET region              | ET region              | TB region              | TB region              | AL region              | AL region              |
| Mean                   | SD                     | Mean                   | SD                     | Mean                   | SD                     |
| (# min <sup>-1</sup> ) |
| 2.26E+07               | 2.85E+07               | 2.85E+07               | 3.58E+07               | 4.82E+07               | 6.06E+07               |
| 3.17E+06               | 4.09E+06               | 5.38E+06               | 6.93E+06               | 1.61E+07               | 2.08E+07               |
| 9.08E+05               | 1.13E+06               | 1.69E+06               | 2.10E+06               | 7.07E+06               | 8.80E+06               |
| 3.33E+05               | 4.28E+05               | 5.40E+05               | 6.94E+05               | 2.71E+06               | 3.48E+06               |
| 1.31E+05               | 1.75E+05               | 1.27E+05               | 1.69E+05               | 7.07E+05               | 9.45E+05               |
| 9.14E+04               | 1.21E+05               | 3.02E+04               | 4.01E+04               | 2.20E+05               | 2.92E+05               |
| 7.03E+04               | 9.55E+04               | 7.19E+03               | 9.76E+03               | 8.88E+04               | 1.21E+05               |
| 6.66E+04               | 1.29E+05               | 4.72E+03               | 9.19E+03               | 5.66E+04               | 1.10E+05               |

|          |          |          |          |          |          |
|----------|----------|----------|----------|----------|----------|
| 1.84E+04 | 4.02E+04 | 1.58E+03 | 3.47E+03 | 1.03E+04 | 2.26E+04 |
| 1.76E+04 | 2.09E+04 | 1.74E+03 | 2.07E+03 | 5.92E+03 | 7.05E+03 |
| 7.51E+03 | 1.04E+04 | 7.14E+02 | 9.87E+02 | 1.50E+03 | 2.07E+03 |
| 2.44E+03 | 4.29E+03 | 1.96E+02 | 3.44E+02 | 3.08E+02 | 5.40E+02 |
| 5.25E+02 | 4.25E+02 | 3.09E+01 | 2.51E+01 | 4.08E+01 | 3.31E+01 |
| 2.40E+03 | 1.03E+04 | 7.56E+01 | 3.26E+02 | 9.27E+01 | 4.00E+02 |
| 3.11E+08 | 3.90E+08 | 5.82E+06 | 7.30E+06 | 7.42E+06 | 9.29E+06 |



**Table. S4.** Hourly Meteorological data obtained from London Heathrow Airport.

| <b>Date and Time</b> | <b>Temp°F</b> | <b>Dew Point °F</b> | <b>Relative Humidity</b> | <b>Wind Direction</b> | <b>Wind Speed in Knots</b> | <b>Altitude</b> |
|----------------------|---------------|---------------------|--------------------------|-----------------------|----------------------------|-----------------|
| 01/01/2020<br>00:20  | 39.2          | 37.4                | 93.19                    | M                     | 2                          | 30.45           |
| 01/01/2020<br>00:50  | 37.4          | 35.6                | 93.14                    | 100                   | 3                          | 30.42           |
| 01/01/2020<br>01:20  | 39.2          | 37.4                | 93.19                    | 140                   | 4                          | 30.42           |
| 01/01/2020<br>01:50  | 39.2          | 37.4                | 93.19                    | M                     | 3                          | 30.42           |
| 01/01/2020<br>02:20  | 39.2          | 39.2                | 100                      | 70                    | 4                          | 30.42           |
| 01/01/2020<br>02:50  | 41            | 39.2                | 93.24                    | 110                   | 5                          | 30.42           |
| 01/01/2020<br>03:20  | 39.2          | 39.2                | 100                      | 120                   | 6                          | 30.42           |
| 01/01/2020<br>03:50  | 39.2          | 39.2                | 100                      | 70                    | 4                          | 30.42           |
| 01/01/2020<br>04:20  | 39.2          | 39.2                | 100                      | 90                    | 7                          | 30.42           |
| 01/01/2020<br>04:50  | 39.2          | 39.2                | 100                      | 100                   | 7                          | 30.42           |
| 01/01/2020<br>05:20  | 39.2          | 39.2                | 100                      | 90                    | 8                          | 30.39           |
| 01/01/2020<br>05:50  | 41            | 39.2                | 93.24                    | 90                    | 6                          | 30.39           |
| 01/01/2020<br>06:20  | 41            | 39.2                | 93.24                    | 90                    | 3                          | 30.42           |
| 01/01/2020<br>06:50  | 41            | 39.2                | 93.24                    | M                     | 3                          | 30.42           |
| 01/01/2020<br>07:20  | 41            | 39.2                | 93.24                    | 180                   | 2                          | 30.42           |
| 01/01/2020<br>07:50  | 39.2          | 37.4                | 93.19                    | 260                   | 1                          | 30.39           |
| 01/01/2020<br>08:20  | 37.4          | 37.4                | 100                      | 110                   | 2                          | 30.42           |
| 01/01/2020<br>08:50  | 39.2          | 39.2                | 100                      | M                     | 2                          | 30.42           |
| 01/01/2020<br>09:20  | 41            | 41                  | 100                      | 60                    | 3                          | 30.42           |
| 01/01/2020<br>09:50  | 41            | 41                  | 100                      | 70                    | 3                          | 30.42           |

|                     |      |      |       |     |   |       |
|---------------------|------|------|-------|-----|---|-------|
| 01/01/2020<br>10:20 | 41   | 41   | 100   | M   | 3 | 30.42 |
| 01/01/2020<br>10:50 | 42.8 | 41   | 93.3  | 230 | 5 | 30.42 |
| 01/01/2020<br>11:20 | 42.8 | 41   | 93.3  | M   | 4 | 30.42 |
| 01/01/2020<br>11:50 | 42.8 | 41   | 93.3  | 260 | 4 | 30.39 |
| 01/01/2020<br>12:20 | 42.8 | 41   | 93.3  | 260 | 5 | 30.39 |
| 01/01/2020<br>12:50 | 42.8 | 41   | 93.3  | 260 | 4 | 30.39 |
| 01/01/2020<br>13:20 | 42.8 | 41   | 93.3  | 190 | 4 | 30.39 |
| 01/01/2020<br>13:50 | 42.8 | 41   | 93.3  | M   | 3 | 30.39 |
| 01/01/2020<br>14:20 | 42.8 | 41   | 93.3  | M   | 2 | 30.39 |
| 01/01/2020<br>14:50 | 42.8 | 41   | 93.3  | 160 | 4 | 30.36 |
| 01/01/2020<br>15:20 | 42.8 | 41   | 93.3  | 120 | 4 | 30.36 |
| 01/01/2020<br>15:50 | 42.8 | 41   | 93.3  | M   | 3 | 30.36 |
| 01/01/2020<br>16:20 | 42.8 | 41   | 93.3  | M   | 2 | 30.36 |
| 01/01/2020<br>16:50 | 42.8 | 41   | 93.3  | 160 | 4 | 30.39 |
| 01/01/2020<br>17:20 | 42.8 | 41   | 93.3  | 210 | 4 | 30.39 |
| 01/01/2020<br>17:50 | 42.8 | 41   | 93.3  | M   | 3 | 30.39 |
| 01/01/2020<br>18:20 | 42.8 | 41   | 93.3  | 140 | 4 | 30.39 |
| 01/01/2020<br>18:50 | 42.8 | 41   | 93.3  | 140 | 4 | 30.39 |
| 01/01/2020<br>19:20 | 42.8 | 41   | 93.3  | 150 | 4 | 30.39 |
| 01/01/2020<br>19:50 | 42.8 | 42.8 | 100   | 140 | 5 | 30.36 |
| 01/01/2020<br>20:20 | 42.8 | 42.8 | 100   | 150 | 4 | 30.36 |
| 01/01/2020<br>20:50 | 44.6 | 42.8 | 93.35 | 150 | 4 | 30.36 |
| 01/01/2020<br>21:20 | 44.6 | 42.8 | 93.35 | 140 | 5 | 30.36 |
| 01/01/2020<br>21:50 | 44.6 | 42.8 | 93.35 | 180 | 6 | 30.33 |

|                     |      |      |       |     |   |       |
|---------------------|------|------|-------|-----|---|-------|
| 01/01/2020<br>22:20 | 44.6 | 42.8 | 93.35 | 140 | 4 | 30.33 |
| 01/01/2020<br>22:50 | 44.6 | 42.8 | 93.35 | 150 | 4 | 30.33 |
| 01/01/2020<br>23:20 | 44.6 | 42.8 | 93.35 | 170 | 4 | 30.33 |
| 01/01/2020<br>23:50 | 44.6 | 42.8 | 93.35 | 170 | 5 | 30.33 |
| 02/01/2020<br>00:20 | 44.6 | 42.8 | 93.35 | 170 | 5 | 30.3  |
| 02/01/2020<br>00:50 | 44.6 | 44.6 | 100   | 180 | 6 | 30.3  |
| 02/01/2020<br>01:20 | 44.6 | 44.6 | 100   | 180 | 6 | 30.27 |
| 02/01/2020<br>01:50 | 44.6 | 44.6 | 100   | 170 | 6 | 30.27 |
| 02/01/2020<br>02:20 | 44.6 | 44.6 | 100   | 160 | 6 | 30.27 |
| 02/01/2020<br>02:50 | 44.6 | 44.6 | 100   | 180 | 7 | 30.27 |
| 02/01/2020<br>03:20 | 44.6 | 44.6 | 100   | 170 | 7 | 30.27 |
| 02/01/2020<br>03:50 | 44.6 | 44.6 | 100   | 170 | 7 | 30.24 |
| 02/01/2020<br>04:20 | 44.6 | 44.6 | 100   | 170 | 6 | 30.24 |
| 02/01/2020<br>04:50 | 44.6 | 44.6 | 100   | 150 | 7 | 30.24 |
| 02/01/2020<br>05:20 | 44.6 | 44.6 | 100   | 170 | 7 | 30.21 |
| 02/01/2020<br>05:50 | 44.6 | 44.6 | 100   | 180 | 5 | 30.21 |
| 02/01/2020<br>06:20 | 44.6 | 44.6 | 100   | 180 | 7 | 30.21 |
| 02/01/2020<br>06:50 | 44.6 | 44.6 | 100   | 170 | 7 | 30.21 |
| 02/01/2020<br>07:20 | 44.6 | 44.6 | 100   | 200 | 7 | 30.21 |
| 02/01/2020<br>07:50 | 46.4 | 44.6 | 93.4  | 190 | 7 | 30.21 |
| 02/01/2020<br>08:20 | 46.4 | 46.4 | 100   | 200 | 9 | 30.21 |
| 02/01/2020<br>08:50 | 46.4 | 46.4 | 100   | 200 | 9 | 30.18 |
| 02/01/2020<br>09:20 | 46.4 | 46.4 | 100   | 190 | 8 | 30.18 |
| 02/01/2020<br>09:50 | 46.4 | 46.4 | 100   | 210 | 9 | 30.18 |

|                     |      |      |       |     |    |       |
|---------------------|------|------|-------|-----|----|-------|
| 02/01/2020<br>10:20 | 48.2 | 46.4 | 93.45 | 200 | 9  | 30.18 |
| 02/01/2020<br>10:50 | 48.2 | 46.4 | 93.45 | 200 | 9  | 30.15 |
| 02/01/2020<br>11:20 | 48.2 | 46.4 | 93.45 | 200 | 11 | 30.15 |
| 02/01/2020<br>11:50 | 50   | 46.4 | 87.37 | 200 | 10 | 30.12 |
| 02/01/2020<br>12:20 | 50   | 46.4 | 87.37 | 200 | 11 | 30.12 |
| 02/01/2020<br>12:50 | 50   | 46.4 | 87.37 | 210 | 12 | 30.09 |
| 02/01/2020<br>13:20 | 50   | 46.4 | 87.37 | 200 | 11 | 30.09 |
| 02/01/2020<br>13:50 | 51.8 | 46.4 | 81.74 | 210 | 12 | 30.06 |
| 02/01/2020<br>14:20 | 50   | 44.6 | 81.61 | 230 | 12 | 30.06 |
| 02/01/2020<br>14:50 | 50   | 44.6 | 81.61 | 220 | 13 | 30.06 |
| 02/01/2020<br>15:20 | 50   | 44.6 | 81.61 | 220 | 11 | 30.06 |
| 02/01/2020<br>15:50 | 50   | 46.4 | 87.37 | 220 | 13 | 30.03 |
| 02/01/2020<br>16:20 | 50   | 46.4 | 87.37 | 220 | 12 | 30.03 |
| 02/01/2020<br>16:50 | 50   | 46.4 | 87.37 | 230 | 15 | 30.03 |
| 02/01/2020<br>17:20 | 50   | 46.4 | 87.37 | 220 | 14 | 30    |
| 02/01/2020<br>17:50 | 50   | 48.2 | 93.5  | 210 | 13 | 30    |
| 02/01/2020<br>18:20 | 48.2 | 48.2 | 100   | 220 | 11 | 30    |
| 02/01/2020<br>18:50 | 48.2 | 48.2 | 100   | 220 | 10 | 30    |
| 02/01/2020<br>19:20 | 50   | 48.2 | 93.5  | 220 | 11 | 30    |
| 02/01/2020<br>19:50 | 50   | 48.2 | 93.5  | 220 | 11 | 30    |
| 02/01/2020<br>20:20 | 50   | 48.2 | 93.5  | 210 | 13 | 29.97 |
| 02/01/2020<br>20:50 | 50   | 48.2 | 93.5  | 210 | 14 | 29.97 |
| 02/01/2020<br>21:20 | 50   | 48.2 | 93.5  | 210 | 14 | 29.97 |
| 02/01/2020<br>21:50 | 50   | 48.2 | 93.5  | 210 | 12 | 29.97 |

|                     |      |      |       |     |    |       |
|---------------------|------|------|-------|-----|----|-------|
| 02/01/2020<br>22:20 | 51.8 | 48.2 | 87.47 | 220 | 10 | 29.97 |
| 02/01/2020<br>22:50 | 51.8 | 48.2 | 87.47 | 210 | 13 | 29.97 |
| 02/01/2020<br>23:20 | 50   | 48.2 | 93.5  | 210 | 11 | 29.97 |
| 02/01/2020<br>23:50 | 50   | 50   | 100   | 210 | 11 | 29.94 |
| 03/01/2020<br>00:20 | 50   | 50   | 100   | 200 | 11 | 29.94 |
| 03/01/2020<br>00:50 | 50   | 50   | 100   | 190 | 12 | 29.91 |
| 03/01/2020<br>01:20 | 50   | 50   | 100   | 200 | 12 | 29.91 |
| 03/01/2020<br>01:50 | 50   | 50   | 100   | 190 | 10 | 29.91 |
| 03/01/2020<br>02:20 | 50   | 50   | 100   | 190 | 10 | 29.88 |
| 03/01/2020<br>02:50 | 50   | 50   | 100   | 190 | 11 | 29.88 |
| 03/01/2020<br>03:20 | 51.8 | 51.8 | 100   | 200 | 10 | 29.88 |
| 03/01/2020<br>03:50 | 51.8 | 51.8 | 100   | 230 | 12 | 29.88 |
| 03/01/2020<br>04:20 | 51.8 | 50   | 93.55 | 260 | 15 | 29.88 |
| 03/01/2020<br>04:50 | 51.8 | 50   | 93.55 | 250 | 12 | 29.91 |
| 03/01/2020<br>05:20 | 51.8 | 50   | 93.55 | 250 | 11 | 29.91 |
| 03/01/2020<br>05:50 | 50   | 50   | 100   | 250 | 11 | 29.94 |
| 03/01/2020<br>06:20 | 50   | 50   | 100   | 250 | 10 | 29.94 |
| 03/01/2020<br>06:50 | 50   | 50   | 100   | 240 | 11 | 29.94 |
| 03/01/2020<br>07:20 | 50   | 50   | 100   | 240 | 10 | 29.97 |
| 03/01/2020<br>07:50 | 50   | 50   | 100   | 260 | 11 | 29.97 |
| 03/01/2020<br>08:20 | 50   | 50   | 100   | 260 | 12 | 30    |
| 03/01/2020<br>08:50 | 50   | 50   | 100   | 260 | 11 | 30    |
| 03/01/2020<br>09:20 | 50   | 50   | 100   | 290 | 10 | 30.03 |
| 03/01/2020<br>09:50 | 48.2 | 44.6 | 87.28 | 310 | 11 | 30.09 |

|                     |      |      |       |     |    |       |
|---------------------|------|------|-------|-----|----|-------|
| 03/01/2020<br>10:20 | 46.4 | 42.8 | 87.19 | 310 | 10 | 30.12 |
| 03/01/2020<br>10:50 | 46.4 | 41   | 81.34 | 310 | 10 | 30.12 |
| 03/01/2020<br>11:20 | 46.4 | 39.2 | 75.84 | 320 | 8  | 30.15 |
| 03/01/2020<br>11:50 | 46.4 | 39.2 | 75.84 | 320 | 9  | 30.18 |
| 03/01/2020<br>12:20 | 46.4 | 37.4 | 70.68 | 320 | 11 | 30.18 |
| 03/01/2020<br>12:50 | 46.4 | 35.6 | 65.83 | 330 | 9  | 30.21 |
| 03/01/2020<br>13:20 | 46.4 | 33.8 | 61.28 | 330 | 10 | 30.21 |
| 03/01/2020<br>13:50 | 48.2 | 35.6 | 61.52 | 330 | 8  | 30.24 |
| 03/01/2020<br>14:20 | 46.4 | 35.6 | 65.83 | 320 | 9  | 30.24 |
| 03/01/2020<br>14:50 | 48.2 | 33.8 | 57.26 | 320 | 9  | 30.27 |
| 03/01/2020<br>15:20 | 48.2 | 35.6 | 61.52 | 310 | 8  | 30.3  |
| 03/01/2020<br>15:50 | 46.4 | 35.6 | 65.83 | 300 | 6  | 30.3  |
| 03/01/2020<br>16:20 | 46.4 | 35.6 | 65.83 | 300 | 5  | 30.33 |
| 03/01/2020<br>16:50 | 46.4 | 35.6 | 65.83 | 290 | 4  | 30.36 |
| 03/01/2020<br>17:20 | 44.6 | 35.6 | 70.48 | 290 | 6  | 30.39 |
| 03/01/2020<br>17:50 | 44.6 | 35.6 | 70.48 | 290 | 6  | 30.39 |
| 03/01/2020<br>18:20 | 42.8 | 37.4 | 81.07 | 290 | 7  | 30.42 |
| 03/01/2020<br>18:50 | 42.8 | 35.6 | 75.5  | 280 | 6  | 30.42 |
| 03/01/2020<br>19:20 | 42.8 | 37.4 | 81.07 | 290 | 8  | 30.42 |
| 03/01/2020<br>19:50 | 42.8 | 35.6 | 75.5  | 280 | 8  | 30.45 |
| 03/01/2020<br>20:20 | 42.8 | 35.6 | 75.5  | 280 | 6  | 30.45 |
| 03/01/2020<br>20:50 | 42.8 | 35.6 | 75.5  | 290 | 6  | 30.45 |
| 03/01/2020<br>21:20 | 42.8 | 35.6 | 75.5  | 300 | 6  | 30.47 |
| 03/01/2020<br>21:50 | 42.8 | 35.6 | 75.5  | 310 | 5  | 30.47 |

|                     |      |      |       |     |    |       |
|---------------------|------|------|-------|-----|----|-------|
| 03/01/2020<br>22:20 | 42.8 | 35.6 | 75.5  | 290 | 8  | 30.47 |
| 03/01/2020<br>22:50 | 42.8 | 35.6 | 75.5  | 300 | 7  | 30.47 |
| 03/01/2020<br>23:20 | 41   | 35.6 | 80.93 | 290 | 7  | 30.47 |
| 03/01/2020<br>23:50 | 39.2 | 35.6 | 86.79 | 250 | 4  | 30.5  |
| 04/01/2020<br>00:20 | 39.2 | 35.6 | 86.79 | M   | 2  | 30.5  |
| 04/01/2020<br>00:50 | 37.4 | 33.8 | 86.69 | 270 | 6  | 30.5  |
| 04/01/2020<br>01:20 | 39.2 | 35.6 | 86.79 | 260 | 8  | 30.5  |
| 04/01/2020<br>01:50 | 39.2 | 35.6 | 86.79 | 270 | 7  | 30.5  |
| 04/01/2020<br>02:20 | 39.2 | 35.6 | 86.79 | 200 | 4  | 30.5  |
| 04/01/2020<br>02:50 | 39.2 | 35.6 | 86.79 | 240 | 5  | 30.5  |
| 04/01/2020<br>03:20 | 41   | 37.4 | 86.89 | 230 | 7  | 30.5  |
| 04/01/2020<br>03:50 | 41   | 37.4 | 86.89 | 230 | 6  | 30.5  |
| 04/01/2020<br>04:20 | 41   | 37.4 | 86.89 | 220 | 6  | 30.5  |
| 04/01/2020<br>04:50 | 41   | 37.4 | 86.89 | 250 | 8  | 30.5  |
| 04/01/2020<br>05:20 | 42.8 | 37.4 | 81.07 | 260 | 7  | 30.5  |
| 04/01/2020<br>05:50 | 42.8 | 39.2 | 86.99 | 260 | 8  | 30.5  |
| 04/01/2020<br>06:20 | 42.8 | 39.2 | 86.99 | 260 | 8  | 30.5  |
| 04/01/2020<br>06:50 | 42.8 | 39.2 | 86.99 | 270 | 7  | 30.5  |
| 04/01/2020<br>07:20 | 42.8 | 39.2 | 86.99 | 260 | 9  | 30.5  |
| 04/01/2020<br>07:50 | 42.8 | 39.2 | 86.99 | 240 | 10 | 30.5  |
| 04/01/2020<br>08:20 | 42.8 | 39.2 | 86.99 | 230 | 10 | 30.5  |
| 04/01/2020<br>08:50 | 42.8 | 39.2 | 86.99 | 230 | 10 | 30.53 |
| 04/01/2020<br>09:20 | 42.8 | 39.2 | 86.99 | 230 | 10 | 30.53 |
| 04/01/2020<br>09:50 | 44.6 | 39.2 | 81.2  | 230 | 9  | 30.53 |

|                     |      |      |       |     |    |       |
|---------------------|------|------|-------|-----|----|-------|
| 04/01/2020<br>10:20 | 44.6 | 39.2 | 81.2  | 240 | 11 | 30.56 |
| 04/01/2020<br>10:50 | 46.4 | 39.2 | 75.84 | 250 | 12 | 30.56 |
| 04/01/2020<br>11:20 | 46.4 | 39.2 | 75.84 | 270 | 12 | 30.56 |
| 04/01/2020<br>11:50 | 46.4 | 39.2 | 75.84 | 270 | 11 | 30.56 |
| 04/01/2020<br>12:20 | 46.4 | 39.2 | 75.84 | 270 | 12 | 30.53 |
| 04/01/2020<br>12:50 | 46.4 | 39.2 | 75.84 | 270 | 13 | 30.53 |
| 04/01/2020<br>13:20 | 48.2 | 39.2 | 70.88 | 270 | 14 | 30.53 |
| 04/01/2020<br>13:50 | 48.2 | 39.2 | 70.88 | 270 | 14 | 30.5  |
| 04/01/2020<br>14:20 | 48.2 | 39.2 | 70.88 | 270 | 11 | 30.53 |
| 04/01/2020<br>14:50 | 46.4 | 39.2 | 75.84 | 280 | 9  | 30.53 |
| 04/01/2020<br>15:20 | 48.2 | 39.2 | 70.88 | 280 | 9  | 30.53 |
| 04/01/2020<br>15:50 | 46.4 | 39.2 | 75.84 | 280 | 9  | 30.53 |
| 04/01/2020<br>16:20 | 46.4 | 39.2 | 75.84 | 270 | 7  | 30.56 |
| 04/01/2020<br>16:50 | 46.4 | 39.2 | 75.84 | 270 | 7  | 30.56 |
| 04/01/2020<br>17:20 | 46.4 | 39.2 | 75.84 | 280 | 7  | 30.56 |
| 04/01/2020<br>17:50 | 46.4 | 39.2 | 75.84 | 280 | 7  | 30.56 |
| 04/01/2020<br>18:20 | 46.4 | 39.2 | 75.84 | 270 | 6  | 30.56 |
| 04/01/2020<br>18:50 | 44.6 | 39.2 | 81.2  | 240 | 7  | 30.56 |
| 04/01/2020<br>19:20 | 46.4 | 41   | 81.34 | 260 | 6  | 30.56 |
| 04/01/2020<br>19:50 | 44.6 | 41   | 87.09 | 250 | 7  | 30.56 |
| 04/01/2020<br>20:20 | 46.4 | 41   | 81.34 | 250 | 7  | 30.56 |
| 04/01/2020<br>20:50 | 44.6 | 41   | 87.09 | 250 | 7  | 30.56 |
| 04/01/2020<br>21:20 | 44.6 | 41   | 87.09 | 250 | 7  | 30.56 |
| 04/01/2020<br>21:50 | 44.6 | 41   | 87.09 | 240 | 5  | 30.56 |



|                     |      |      |       |     |    |       |
|---------------------|------|------|-------|-----|----|-------|
| 04/01/2020<br>22:20 | 44.6 | 41   | 87.09 | 250 | 6  | 30.56 |
| 04/01/2020<br>22:50 | 44.6 | 41   | 87.09 | 260 | 5  | 30.56 |
| 04/01/2020<br>23:20 | 44.6 | 41   | 87.09 | 230 | 4  | 30.56 |
| 04/01/2020<br>23:50 | 44.6 | 42.8 | 93.35 | 240 | 5  | 30.56 |
| 05/01/2020<br>00:20 | 44.6 | 42.8 | 93.35 | 240 | 6  | 30.56 |
| 05/01/2020<br>00:50 | 44.6 | 42.8 | 93.35 | 230 | 6  | 30.56 |
| 05/01/2020<br>01:20 | 44.6 | 42.8 | 93.35 | 240 | 6  | 30.56 |
| 05/01/2020<br>01:50 | 44.6 | 42.8 | 93.35 | 250 | 5  | 30.56 |
| 05/01/2020<br>02:20 | 44.6 | 42.8 | 93.35 | 230 | 6  | 30.56 |
| 05/01/2020<br>02:50 | 44.6 | 42.8 | 93.35 | 240 | 7  | 30.56 |
| 05/01/2020<br>03:20 | 44.6 | 42.8 | 93.35 | 240 | 6  | 30.56 |
| 05/01/2020<br>03:50 | 44.6 | 42.8 | 93.35 | 240 | 6  | 30.56 |
| 05/01/2020<br>04:20 | 44.6 | 42.8 | 93.35 | 240 | 8  | 30.56 |
| 05/01/2020<br>04:50 | 44.6 | 42.8 | 93.35 | 230 | 8  | 30.56 |
| 05/01/2020<br>05:20 | 44.6 | 42.8 | 93.35 | 230 | 8  | 30.53 |
| 05/01/2020<br>05:50 | 44.6 | 42.8 | 93.35 | 230 | 10 | 30.53 |
| 05/01/2020<br>06:20 | 42.8 | 42.8 | 100   | 220 | 7  | 30.53 |
| 05/01/2020<br>06:50 | 44.6 | 42.8 | 93.35 | 210 | 8  | 30.53 |
| 05/01/2020<br>07:20 | 44.6 | 42.8 | 93.35 | 230 | 8  | 30.53 |
| 05/01/2020<br>07:50 | 44.6 | 42.8 | 93.35 | 220 | 7  | 30.53 |
| 05/01/2020<br>08:20 | 44.6 | 42.8 | 93.35 | 230 | 8  | 30.53 |
| 05/01/2020<br>08:50 | 44.6 | 42.8 | 93.35 | 240 | 8  | 30.53 |
| 05/01/2020<br>09:20 | 44.6 | 42.8 | 93.35 | 230 | 7  | 30.53 |
| 05/01/2020<br>09:50 | 44.6 | 42.8 | 93.35 | 230 | 9  | 30.53 |

|                     |      |      |       |     |    |       |
|---------------------|------|------|-------|-----|----|-------|
| 05/01/2020<br>10:20 | 46.4 | 42.8 | 87.19 | 240 | 11 | 30.53 |
| 05/01/2020<br>10:50 | 46.4 | 41   | 81.34 | 230 | 9  | 30.53 |
| 05/01/2020<br>11:20 | 48.2 | 41   | 76.01 | 250 | 11 | 30.53 |
| 05/01/2020<br>11:50 | 48.2 | 41   | 76.01 | 250 | 12 | 30.53 |
| 05/01/2020<br>12:20 | 48.2 | 39.2 | 70.88 | 250 | 15 | 30.5  |
| 05/01/2020<br>12:50 | 48.2 | 39.2 | 70.88 | 250 | 12 | 30.5  |
| 05/01/2020<br>13:20 | 48.2 | 41   | 76.01 | 250 | 13 | 30.5  |
| 05/01/2020<br>13:50 | 48.2 | 39.2 | 70.88 | 240 | 12 | 30.47 |
| 05/01/2020<br>14:20 | 48.2 | 39.2 | 70.88 | 240 | 13 | 30.47 |
| 05/01/2020<br>14:50 | 48.2 | 39.2 | 70.88 | 250 | 11 | 30.47 |
| 05/01/2020<br>15:20 | 48.2 | 39.2 | 70.88 | 240 | 10 | 30.47 |
| 05/01/2020<br>15:50 | 48.2 | 39.2 | 70.88 | 250 | 11 | 30.47 |
| 05/01/2020<br>16:20 | 48.2 | 39.2 | 70.88 | 240 | 11 | 30.47 |
| 05/01/2020<br>16:50 | 48.2 | 41   | 76.01 | 230 | 9  | 30.47 |
| 05/01/2020<br>17:20 | 48.2 | 41   | 76.01 | 220 | 9  | 30.47 |
| 05/01/2020<br>17:50 | 46.4 | 41   | 81.34 | 210 | 8  | 30.47 |
| 05/01/2020<br>18:20 | 46.4 | 41   | 81.34 | 210 | 9  | 30.47 |
| 05/01/2020<br>18:50 | 46.4 | 42.8 | 87.19 | 220 | 8  | 30.45 |
| 05/01/2020<br>19:20 | 46.4 | 42.8 | 87.19 | 220 | 9  | 30.45 |
| 05/01/2020<br>19:50 | 46.4 | 41   | 81.34 | 220 | 8  | 30.45 |
| 05/01/2020<br>20:20 | 46.4 | 42.8 | 87.19 | 210 | 7  | 30.45 |
| 05/01/2020<br>20:50 | 46.4 | 42.8 | 87.19 | 210 | 8  | 30.45 |
| 05/01/2020<br>21:20 | 46.4 | 42.8 | 87.19 | 210 | 7  | 30.42 |
| 05/01/2020<br>21:50 | 46.4 | 42.8 | 87.19 | 220 | 8  | 30.42 |

|                     |      |      |       |     |    |       |
|---------------------|------|------|-------|-----|----|-------|
| 05/01/2020<br>22:20 | 46.4 | 42.8 | 87.19 | 220 | 8  | 30.42 |
| 05/01/2020<br>22:50 | 46.4 | 42.8 | 87.19 | 220 | 7  | 30.39 |
| 05/01/2020<br>23:20 | 46.4 | 42.8 | 87.19 | 210 | 6  | 30.39 |
| 05/01/2020<br>23:50 | 46.4 | 42.8 | 87.19 | 210 | 5  | 30.39 |
| 06/01/2020<br>00:20 | 46.4 | 42.8 | 87.19 | 210 | 4  | 30.39 |
| 06/01/2020<br>00:50 | 46.4 | 42.8 | 87.19 | 190 | 8  | 30.36 |
| 06/01/2020<br>01:20 | 46.4 | 42.8 | 87.19 | 200 | 8  | 30.36 |
| 06/01/2020<br>01:50 | 46.4 | 41   | 81.34 | 210 | 9  | 30.36 |
| 06/01/2020<br>02:20 | 46.4 | 41   | 81.34 | 210 | 10 | 30.33 |
| 06/01/2020<br>02:50 | 46.4 | 39.2 | 75.84 | 210 | 9  | 30.33 |
| 06/01/2020<br>03:20 | 44.6 | 37.4 | 75.68 | 220 | 11 | 30.33 |
| 06/01/2020<br>03:50 | 44.6 | 37.4 | 75.68 | 220 | 12 | 30.3  |
| 06/01/2020<br>04:20 | 44.6 | 37.4 | 75.68 | 210 | 11 | 30.3  |
| 06/01/2020<br>04:50 | 44.6 | 37.4 | 75.68 | 210 | 11 | 30.3  |
| 06/01/2020<br>05:20 | 44.6 | 37.4 | 75.68 | 200 | 9  | 30.27 |
| 06/01/2020<br>05:50 | 44.6 | 37.4 | 75.68 | 200 | 10 | 30.27 |
| 06/01/2020<br>06:20 | 44.6 | 37.4 | 75.68 | 200 | 10 | 30.27 |
| 06/01/2020<br>06:50 | 44.6 | 37.4 | 75.68 | 200 | 10 | 30.24 |
| 06/01/2020<br>07:20 | 44.6 | 37.4 | 75.68 | 210 | 10 | 30.24 |
| 06/01/2020<br>07:50 | 44.6 | 37.4 | 75.68 | 200 | 10 | 30.24 |
| 06/01/2020<br>08:20 | 44.6 | 37.4 | 75.68 | 200 | 10 | 30.21 |
| 06/01/2020<br>08:50 | 44.6 | 37.4 | 75.68 | 200 | 9  | 30.21 |
| 06/01/2020<br>09:20 | 44.6 | 37.4 | 75.68 | 200 | 11 | 30.18 |
| 06/01/2020<br>09:50 | 44.6 | 37.4 | 75.68 | 200 | 13 | 30.18 |

|                     |      |      |       |     |    |       |
|---------------------|------|------|-------|-----|----|-------|
| 06/01/2020<br>10:20 | 44.6 | 37.4 | 75.68 | 200 | 14 | 30.15 |
| 06/01/2020<br>10:50 | 44.6 | 37.4 | 75.68 | 210 | 14 | 30.15 |
| 06/01/2020<br>11:20 | 44.6 | 37.4 | 75.68 | 210 | 13 | 30.12 |
| 06/01/2020<br>11:50 | 46.4 | 37.4 | 70.68 | 210 | 16 | 30.12 |
| 06/01/2020<br>12:20 | 46.4 | 37.4 | 70.68 | 220 | 16 | 30.09 |
| 06/01/2020<br>12:50 | 44.6 | 37.4 | 75.68 | 210 | 14 | 30.09 |
| 06/01/2020<br>13:20 | 46.4 | 39.2 | 75.84 | 210 | 12 | 30.06 |
| 06/01/2020<br>13:50 | 46.4 | 39.2 | 75.84 | 200 | 12 | 30.06 |
| 06/01/2020<br>14:20 | 46.4 | 41   | 81.34 | 200 | 12 | 30.06 |
| 06/01/2020<br>14:50 | 46.4 | 41   | 81.34 | 210 | 9  | 30.06 |
| 06/01/2020<br>15:20 | 48.2 | 42.8 | 81.47 | 200 | 11 | 30.03 |
| 06/01/2020<br>15:50 | 46.4 | 42.8 | 87.19 | 200 | 11 | 30.03 |
| 06/01/2020<br>16:20 | 46.4 | 44.6 | 93.4  | 210 | 10 | 30.06 |
| 06/01/2020<br>16:50 | 46.4 | 44.6 | 93.4  | 210 | 9  | 30.03 |
| 06/01/2020<br>17:20 | 46.4 | 46.4 | 100   | 210 | 11 | 30.06 |
| 06/01/2020<br>17:50 | 48.2 | 46.4 | 93.45 | 210 | 11 | 30.06 |
| 06/01/2020<br>18:20 | 46.4 | 46.4 | 100   | 210 | 9  | 30.06 |
| 06/01/2020<br>18:50 | 46.4 | 46.4 | 100   | 220 | 8  | 30.06 |
| 06/01/2020<br>19:20 | 46.4 | 46.4 | 100   | 250 | 12 | 30.09 |
| 06/01/2020<br>19:50 | 46.4 | 46.4 | 100   | 260 | 11 | 30.09 |
| 06/01/2020<br>20:20 | 46.4 | 46.4 | 100   | 260 | 10 | 30.12 |
| 06/01/2020<br>20:50 | 48.2 | 44.6 | 87.28 | 270 | 12 | 30.12 |
| 06/01/2020<br>21:20 | 46.4 | 44.6 | 93.4  | 270 | 13 | 30.15 |
| 06/01/2020<br>21:50 | 46.4 | 44.6 | 93.4  | 270 | 10 | 30.15 |

|                     |      |      |       |     |    |       |
|---------------------|------|------|-------|-----|----|-------|
| 06/01/2020<br>22:20 | 44.6 | 42.8 | 93.35 | 270 | 10 | 30.15 |
| 06/01/2020<br>22:50 | 44.6 | 42.8 | 93.35 | 270 | 5  | 30.18 |
| 06/01/2020<br>23:20 | 44.6 | 42.8 | 93.35 | 250 | 4  | 30.18 |
| 06/01/2020<br>23:50 | 42.8 | 41   | 93.3  | 250 | 4  | 30.21 |
| 07/01/2020<br>00:20 | 42.8 | 42.8 | 100   | 270 | 6  | 30.21 |
| 07/01/2020<br>00:50 | 44.6 | 42.8 | 93.35 | 260 | 6  | 30.24 |
| 07/01/2020<br>01:20 | 42.8 | 42.8 | 100   | 210 | 5  | 30.24 |
| 07/01/2020<br>01:50 | 42.8 | 41   | 93.3  | 220 | 5  | 30.24 |
| 07/01/2020<br>02:20 | 42.8 | 41   | 93.3  | 220 | 5  | 30.24 |
| 07/01/2020<br>02:50 | 41   | 41   | 100   | 200 | 6  | 30.24 |
| 07/01/2020<br>03:20 | 41   | 41   | 100   | 200 | 7  | 30.24 |
| 07/01/2020<br>03:50 | 41   | 41   | 100   | 210 | 7  | 30.24 |
| 07/01/2020<br>04:20 | 41   | 41   | 100   | 160 | 3  | 30.24 |
| 07/01/2020<br>04:50 | 42.8 | 41   | 93.3  | 220 | 4  | 30.24 |
| 07/01/2020<br>05:20 | 42.8 | 42.8 | 100   | 210 | 9  | 30.24 |
| 07/01/2020<br>05:50 | 42.8 | 42.8 | 100   | 220 | 8  | 30.24 |
| 07/01/2020<br>06:20 | 42.8 | 42.8 | 100   | 210 | 6  | 30.24 |
| 07/01/2020<br>06:50 | 42.8 | 42.8 | 100   | 210 | 8  | 30.24 |
| 07/01/2020<br>07:20 | 44.6 | 42.8 | 93.35 | 220 | 8  | 30.24 |
| 07/01/2020<br>07:50 | 44.6 | 44.6 | 100   | 210 | 7  | 30.24 |
| 07/01/2020<br>08:20 | 44.6 | 44.6 | 100   | 210 | 8  | 30.24 |
| 07/01/2020<br>08:50 | 46.4 | 44.6 | 93.4  | 210 | 8  | 30.24 |
| 07/01/2020<br>09:20 | 46.4 | 46.4 | 100   | 210 | 8  | 30.24 |
| 07/01/2020<br>09:50 | 48.2 | 46.4 | 93.45 | 210 | 10 | 30.24 |

|                     |      |      |       |     |    |       |
|---------------------|------|------|-------|-----|----|-------|
| 07/01/2020<br>10:20 | 50   | 48.2 | 93.5  | 200 | 10 | 30.21 |
| 07/01/2020<br>10:50 | 50   | 48.2 | 93.5  | 210 | 10 | 30.21 |
| 07/01/2020<br>11:20 | 51.8 | 48.2 | 87.47 | 220 | 13 | 30.21 |
| 07/01/2020<br>11:50 | 51.8 | 48.2 | 87.47 | 210 | 12 | 30.21 |
| 07/01/2020<br>12:20 | 53.6 | 48.2 | 81.87 | 220 | 12 | 30.18 |
| 07/01/2020<br>12:50 | 51.8 | 48.2 | 87.47 | 220 | 12 | 30.18 |
| 07/01/2020<br>13:20 | 51.8 | 48.2 | 87.47 | 210 | 12 | 30.15 |
| 07/01/2020<br>13:50 | 51.8 | 48.2 | 87.47 | 210 | 13 | 30.15 |
| 07/01/2020<br>14:20 | 51.8 | 48.2 | 87.47 | 190 | 12 | 30.15 |
| 07/01/2020<br>14:50 | 51.8 | 48.2 | 87.47 | 200 | 11 | 30.12 |
| 07/01/2020<br>15:20 | 51.8 | 50   | 93.55 | 210 | 11 | 30.12 |
| 07/01/2020<br>15:50 | 51.8 | 50   | 93.55 | 200 | 14 | 30.09 |
| 07/01/2020<br>16:20 | 51.8 | 51.8 | 100   | 210 | 13 | 30.09 |
| 07/01/2020<br>16:50 | 51.8 | 51.8 | 100   | 200 | 13 | 30.09 |
| 07/01/2020<br>17:20 | 53.6 | 51.8 | 93.6  | 220 | 13 | 30.09 |
| 07/01/2020<br>17:50 | 53.6 | 51.8 | 93.6  | 210 | 14 | 30.09 |
| 07/01/2020<br>18:20 | 51.8 | 51.8 | 100   | 210 | 12 | 30.09 |
| 07/01/2020<br>18:50 | 53.6 | 53.6 | 100   | 210 | 11 | 30.09 |
| 07/01/2020<br>19:20 | 53.6 | 53.6 | 100   | 220 | 13 | 30.06 |
| 07/01/2020<br>19:50 | 55.4 | 53.6 | 93.65 | 220 | 13 | 30.06 |
| 07/01/2020<br>20:20 | 55.4 | 53.6 | 93.65 | 220 | 14 | 30.06 |
| 07/01/2020<br>20:50 | 55.4 | 53.6 | 93.65 | 220 | 14 | 30.06 |
| 07/01/2020<br>21:20 | 55.4 | 53.6 | 93.65 | 230 | 15 | 30.09 |
| 07/01/2020<br>21:50 | 55.4 | 53.6 | 93.65 | 220 | 13 | 30.06 |

|                     |      |      |       |     |    |       |
|---------------------|------|------|-------|-----|----|-------|
| 07/01/2020<br>22:20 | 55.4 | 53.6 | 93.65 | 230 | 13 | 30.06 |
| 07/01/2020<br>22:50 | 55.4 | 53.6 | 93.65 | 230 | 14 | 30.06 |
| 07/01/2020<br>23:20 | 55.4 | 53.6 | 93.65 | 230 | 12 | 30.09 |
| 07/01/2020<br>23:50 | 53.6 | 53.6 | 100   | 230 | 12 | 30.06 |
| 08/01/2020<br>00:20 | 53.6 | 53.6 | 100   | 230 | 14 | 30.06 |
| 08/01/2020<br>00:50 | 53.6 | 53.6 | 100   | 220 | 13 | 30.06 |
| 08/01/2020<br>01:20 | 53.6 | 53.6 | 100   | 230 | 14 | 30.06 |
| 08/01/2020<br>01:50 | 53.6 | 53.6 | 100   | 230 | 13 | 30.09 |
| 08/01/2020<br>02:20 | 53.6 | 51.8 | 93.6  | 220 | 11 | 30.09 |
| 08/01/2020<br>02:50 | 55.4 | 53.6 | 93.65 | 230 | 12 | 30.09 |
| 08/01/2020<br>03:20 | 55.4 | 53.6 | 93.65 | 240 | 11 | 30.09 |
| 08/01/2020<br>03:50 | 55.4 | 53.6 | 93.65 | 240 | 12 | 30.09 |
| 08/01/2020<br>04:20 | 53.6 | 53.6 | 100   | 250 | 11 | 30.09 |
| 08/01/2020<br>04:50 | 53.6 | 53.6 | 100   | 240 | 9  | 30.12 |
| 08/01/2020<br>05:20 | 53.6 | 51.8 | 93.6  | 240 | 11 | 30.09 |
| 08/01/2020<br>05:50 | 53.6 | 51.8 | 93.6  | 250 | 11 | 30.12 |
| 08/01/2020<br>06:20 | 53.6 | 51.8 | 93.6  | 250 | 12 | 30.12 |
| 08/01/2020<br>06:50 | 53.6 | 50   | 87.56 | 250 | 9  | 30.12 |
| 08/01/2020<br>07:20 | 53.6 | 50   | 87.56 | 250 | 11 | 30.15 |
| 08/01/2020<br>07:50 | 53.6 | 48.2 | 81.87 | 250 | 11 | 30.15 |
| 08/01/2020<br>08:20 | 53.6 | 48.2 | 81.87 | 250 | 11 | 30.15 |
| 08/01/2020<br>08:50 | 51.8 | 48.2 | 87.47 | 250 | 12 | 30.18 |
| 08/01/2020<br>09:20 | 53.6 | 48.2 | 81.87 | 250 | 12 | 30.18 |
| 08/01/2020<br>09:50 | 51.8 | 48.2 | 87.47 | 250 | 10 | 30.18 |

|                     |      |      |       |     |    |       |
|---------------------|------|------|-------|-----|----|-------|
| 08/01/2020<br>10:20 | 53.6 | 48.2 | 81.87 | 260 | 10 | 30.21 |
| 08/01/2020<br>10:50 | 53.6 | 48.2 | 81.87 | 260 | 10 | 30.21 |
| 08/01/2020<br>11:20 | 53.6 | 48.2 | 81.87 | 250 | 11 | 30.21 |
| 08/01/2020<br>11:50 | 53.6 | 48.2 | 81.87 | 260 | 11 | 30.18 |
| 08/01/2020<br>12:20 | 53.6 | 48.2 | 81.87 | 270 | 11 | 30.18 |
| 08/01/2020<br>12:50 | 53.6 | 48.2 | 81.87 | 260 | 9  | 30.18 |
| 08/01/2020<br>13:20 | 53.6 | 48.2 | 81.87 | 250 | 7  | 30.18 |
| 08/01/2020<br>13:50 | 53.6 | 48.2 | 81.87 | 260 | 8  | 30.18 |
| 08/01/2020<br>14:20 | 53.6 | 48.2 | 81.87 | 280 | 8  | 30.18 |
| 08/01/2020<br>14:50 | 53.6 | 46.4 | 76.5  | 270 | 6  | 30.18 |
| 08/01/2020<br>15:20 | 53.6 | 46.4 | 76.5  | 270 | 7  | 30.21 |
| 08/01/2020<br>15:50 | 51.8 | 46.4 | 81.74 | 250 | 8  | 30.21 |
| 08/01/2020<br>16:20 | 51.8 | 48.2 | 87.47 | 240 | 6  | 30.21 |
| 08/01/2020<br>16:50 | 51.8 | 48.2 | 87.47 | 240 | 8  | 30.21 |
| 08/01/2020<br>17:20 | 50   | 48.2 | 93.5  | 200 | 5  | 30.18 |
| 08/01/2020<br>17:50 | 50   | 48.2 | 93.5  | 250 | 4  | 30.18 |
| 08/01/2020<br>18:20 | 50   | 48.2 | 93.5  | 170 | 6  | 30.18 |
| 08/01/2020<br>18:50 | 50   | 48.2 | 93.5  | 190 | 5  | 30.15 |
| 08/01/2020<br>19:20 | 50   | 48.2 | 93.5  | 190 | 6  | 30.15 |
| 08/01/2020<br>19:50 | 50   | 48.2 | 93.5  | 170 | 4  | 30.15 |
| 08/01/2020<br>20:20 | 50   | 48.2 | 93.5  | 170 | 5  | 30.12 |
| 08/01/2020<br>20:50 | 50   | 48.2 | 93.5  | 160 | 6  | 30.09 |
| 08/01/2020<br>21:20 | 50   | 48.2 | 93.5  | 150 | 7  | 30.06 |
| 08/01/2020<br>21:50 | 50   | 48.2 | 93.5  | 150 | 7  | 30.06 |



|                     |      |      |       |     |    |       |
|---------------------|------|------|-------|-----|----|-------|
| 08/01/2020<br>22:20 | 50   | 48.2 | 93.5  | 150 | 8  | 30.03 |
| 08/01/2020<br>22:50 | 50   | 48.2 | 93.5  | 150 | 7  | 30    |
| 08/01/2020<br>23:20 | 50   | 50   | 100   | 140 | 9  | 29.97 |
| 09/01/2020<br>01:20 | 53.6 | 53.6 | 100   | 190 | 14 | 29.88 |
| 09/01/2020<br>01:50 | 53.6 | 53.6 | 100   | 200 | 12 | 29.85 |
| 09/01/2020<br>02:20 | 53.6 | 53.6 | 100   | 200 | 16 | 29.85 |
| 09/01/2020<br>02:50 | 53.6 | 53.6 | 100   | 200 | 15 | 29.83 |
| 09/01/2020<br>03:20 | 53.6 | 53.6 | 100   | 200 | 14 | 29.83 |
| 09/01/2020<br>03:50 | 53.6 | 53.6 | 100   | 210 | 17 | 29.8  |
| 09/01/2020<br>04:20 | 53.6 | 53.6 | 100   | 210 | 15 | 29.77 |
| 09/01/2020<br>04:50 | 53.6 | 53.6 | 100   | 210 | 14 | 29.77 |
| 09/01/2020<br>05:20 | 53.6 | 53.6 | 100   | 200 | 15 | 29.74 |
| 09/01/2020<br>05:50 | 53.6 | 53.6 | 100   | 210 | 14 | 29.74 |
| 09/01/2020<br>06:20 | 55.4 | 53.6 | 93.65 | 220 | 14 | 29.74 |
| 09/01/2020<br>06:50 | 55.4 | 51.8 | 87.65 | 220 | 14 | 29.74 |
| 09/01/2020<br>07:20 | 53.6 | 51.8 | 93.6  | 220 | 16 | 29.71 |
| 09/01/2020<br>07:50 | 53.6 | 50   | 87.56 | 220 | 14 | 29.71 |
| 09/01/2020<br>08:20 | 53.6 | 48.2 | 81.87 | 220 | 16 | 29.71 |
| 09/01/2020<br>08:50 | 53.6 | 48.2 | 81.87 | 220 | 15 | 29.71 |
| 09/01/2020<br>09:20 | 53.6 | 48.2 | 81.87 | 240 | 13 | 29.74 |
| 09/01/2020<br>09:50 | 51.8 | 48.2 | 87.47 | 230 | 15 | 29.74 |
| 09/01/2020<br>10:20 | 51.8 | 48.2 | 87.47 | 220 | 15 | 29.74 |
| 09/01/2020<br>10:50 | 53.6 | 48.2 | 81.87 | 230 | 14 | 29.74 |
| 09/01/2020<br>11:20 | 53.6 | 48.2 | 81.87 | 230 | 12 | 29.74 |

|                     |      |      |       |     |    |       |
|---------------------|------|------|-------|-----|----|-------|
| 09/01/2020<br>11:50 | 55.4 | 46.4 | 71.64 | 240 | 15 | 29.71 |
| 09/01/2020<br>12:20 | 55.4 | 46.4 | 71.64 | 220 | 13 | 29.71 |
| 09/01/2020<br>12:50 | 55.4 | 46.4 | 71.64 | 240 | 13 | 29.68 |
| 09/01/2020<br>13:20 | 55.4 | 46.4 | 71.64 | 220 | 9  | 29.68 |
| 09/01/2020<br>13:50 | 55.4 | 48.2 | 76.66 | 210 | 8  | 29.65 |
| 09/01/2020<br>14:20 | 53.6 | 50   | 87.56 | 210 | 9  | 29.65 |
| 09/01/2020<br>14:50 | 53.6 | 51.8 | 93.6  | 180 | 9  | 29.65 |
| 09/01/2020<br>15:20 | 51.8 | 51.8 | 100   | M   | 3  | 29.62 |
| 09/01/2020<br>15:50 | 51.8 | 51.8 | 100   | 220 | 7  | 29.62 |
| 09/01/2020<br>16:20 | 53.6 | 51.8 | 93.6  | 210 | 8  | 29.62 |
| 09/01/2020<br>16:50 | 51.8 | 50   | 93.55 | 210 | 8  | 29.62 |
| 09/01/2020<br>17:20 | 51.8 | 50   | 93.55 | 220 | 11 | 29.62 |
| 09/01/2020<br>17:50 | 51.8 | 48.2 | 87.47 | 230 | 13 | 29.65 |
| 09/01/2020<br>18:20 | 50   | 44.6 | 81.61 | 240 | 11 | 29.65 |
| 09/01/2020<br>18:50 | 50   | 44.6 | 81.61 | 240 | 10 | 29.65 |
| 09/01/2020<br>19:20 | 48.2 | 42.8 | 81.47 | 220 | 8  | 29.65 |
| 09/01/2020<br>19:50 | 46.4 | 44.6 | 93.4  | 200 | 8  | 29.68 |
| 09/01/2020<br>20:20 | 46.4 | 44.6 | 93.4  | 210 | 9  | 29.68 |
| 09/01/2020<br>20:50 | 48.2 | 44.6 | 87.28 | 230 | 15 | 29.68 |
| 09/01/2020<br>21:20 | 48.2 | 42.8 | 81.47 | 250 | 18 | 29.71 |
| 09/01/2020<br>21:50 | 44.6 | 41   | 87.09 | 260 | 21 | 29.71 |
| 09/01/2020<br>22:20 | 44.6 | 41   | 87.09 | 270 | 17 | 29.71 |
| 09/01/2020<br>22:50 | 44.6 | 42.8 | 93.35 | 310 | 12 | 29.74 |
| 09/01/2020<br>23:20 | 42.8 | 41   | 93.3  | 310 | 8  | 29.77 |

|                     |      |      |       |     |   |       |
|---------------------|------|------|-------|-----|---|-------|
| 09/01/2020<br>23:50 | 42.8 | 41   | 93.3  | 310 | 8 | 29.8  |
| 10/01/2020<br>00:20 | 42.8 | 41   | 93.3  | 300 | 9 | 29.83 |
| 10/01/2020<br>00:50 | 42.8 | 41   | 93.3  | 310 | 7 | 29.85 |
| 10/01/2020<br>01:20 | 42.8 | 41   | 93.3  | 310 | 7 | 29.85 |
| 10/01/2020<br>01:50 | 42.8 | 41   | 93.3  | 310 | 8 | 29.88 |
| 10/01/2020<br>02:20 | 42.8 | 41   | 93.3  | 320 | 7 | 29.91 |
| 10/01/2020<br>02:50 | 42.8 | 41   | 93.3  | 320 | 8 | 29.94 |
| 10/01/2020<br>03:20 | 42.8 | 41   | 93.3  | 330 | 7 | 29.94 |
| 10/01/2020<br>03:50 | 42.8 | 41   | 93.3  | 320 | 8 | 29.97 |
| 10/01/2020<br>04:20 | 42.8 | 41   | 93.3  | 320 | 6 | 30    |
| 10/01/2020<br>04:50 | 42.8 | 39.2 | 86.99 | 320 | 8 | 30.03 |
| 10/01/2020<br>05:20 | 42.8 | 39.2 | 86.99 | 310 | 7 | 30.06 |
| 10/01/2020<br>05:50 | 42.8 | 39.2 | 86.99 | 300 | 8 | 30.09 |
| 10/01/2020<br>06:20 | 42.8 | 39.2 | 86.99 | 300 | 9 | 30.09 |
| 10/01/2020<br>06:50 | 42.8 | 37.4 | 81.07 | 300 | 7 | 30.12 |
| 10/01/2020<br>07:20 | 42.8 | 37.4 | 81.07 | 300 | 7 | 30.15 |
| 10/01/2020<br>07:50 | 42.8 | 35.6 | 75.5  | 310 | 7 | 30.15 |
| 10/01/2020<br>08:20 | 42.8 | 35.6 | 75.5  | 310 | 7 | 30.18 |
| 10/01/2020<br>08:50 | 42.8 | 35.6 | 75.5  | 300 | 7 | 30.21 |
| 10/01/2020<br>09:20 | 42.8 | 35.6 | 75.5  | 300 | 7 | 30.24 |
| 10/01/2020<br>09:50 | 42.8 | 33.8 | 70.28 | 310 | 8 | 30.24 |
| 10/01/2020<br>10:20 | 42.8 | 33.8 | 70.28 | 300 | 7 | 30.27 |
| 10/01/2020<br>10:50 | 44.6 | 35.6 | 70.48 | 320 | 5 | 30.3  |
| 10/01/2020<br>11:20 | 44.6 | 35.6 | 70.48 | 310 | 7 | 30.3  |

|                     |      |      |       |     |    |       |
|---------------------|------|------|-------|-----|----|-------|
| 10/01/2020<br>11:50 | 46.4 | 37.4 | 70.68 | 300 | 7  | 30.3  |
| 10/01/2020<br>12:20 | 46.4 | 37.4 | 70.68 | 290 | 4  | 30.3  |
| 10/01/2020<br>12:50 | 46.4 | 35.6 | 65.83 | 310 | 6  | 30.3  |
| 10/01/2020<br>13:20 | 46.4 | 35.6 | 65.83 | 300 | 6  | 30.3  |
| 10/01/2020<br>13:50 | 46.4 | 35.6 | 65.83 | 290 | 7  | 30.33 |
| 10/01/2020<br>14:20 | 46.4 | 37.4 | 70.68 | M   | 2  | 30.33 |
| 10/01/2020<br>14:50 | 46.4 | 37.4 | 70.68 | 270 | 6  | 30.33 |
| 10/01/2020<br>15:20 | 44.6 | 35.6 | 70.48 | 270 | 9  | 30.36 |
| 10/01/2020<br>15:50 | 46.4 | 37.4 | 70.68 | 260 | 9  | 30.36 |
| 10/01/2020<br>16:20 | 44.6 | 35.6 | 70.48 | 240 | 7  | 30.36 |
| 10/01/2020<br>16:50 | 42.8 | 35.6 | 75.5  | 210 | 7  | 30.36 |
| 10/01/2020<br>17:20 | 42.8 | 35.6 | 75.5  | 230 | 7  | 30.36 |
| 10/01/2020<br>17:50 | 44.6 | 35.6 | 70.48 | 240 | 9  | 30.39 |
| 10/01/2020<br>18:20 | 42.8 | 35.6 | 75.5  | 210 | 7  | 30.39 |
| 10/01/2020<br>18:50 | 42.8 | 35.6 | 75.5  | 220 | 8  | 30.39 |
| 10/01/2020<br>19:20 | 41   | 35.6 | 80.93 | 210 | 8  | 30.39 |
| 10/01/2020<br>19:50 | 41   | 35.6 | 80.93 | 210 | 8  | 30.39 |
| 10/01/2020<br>20:20 | 41   | 35.6 | 80.93 | 220 | 8  | 30.42 |
| 10/01/2020<br>20:50 | 41   | 35.6 | 80.93 | 210 | 8  | 30.42 |
| 10/01/2020<br>21:20 | 41   | 37.4 | 86.89 | 210 | 10 | 30.42 |
| 10/01/2020<br>21:50 | 41   | 37.4 | 86.89 | 210 | 8  | 30.42 |
| 10/01/2020<br>22:20 | 41   | 37.4 | 86.89 | 200 | 9  | 30.39 |
| 10/01/2020<br>22:50 | 41   | 37.4 | 86.89 | 200 | 10 | 30.39 |
| 10/01/2020<br>23:20 | 42.8 | 37.4 | 81.07 | 200 | 9  | 30.39 |

|                     |      |      |       |     |    |       |
|---------------------|------|------|-------|-----|----|-------|
| 10/01/2020<br>23:50 | 42.8 | 39.2 | 86.99 | 210 | 10 | 30.39 |
| 11/01/2020<br>00:20 | 42.8 | 39.2 | 86.99 | 200 | 9  | 30.39 |
| 11/01/2020<br>00:50 | 42.8 | 39.2 | 86.99 | 200 | 8  | 30.39 |
| 11/01/2020<br>01:20 | 42.8 | 39.2 | 86.99 | 210 | 7  | 30.39 |
| 11/01/2020<br>01:50 | 42.8 | 39.2 | 86.99 | 210 | 8  | 30.36 |
| 11/01/2020<br>02:20 | 44.6 | 39.2 | 81.2  | 200 | 8  | 30.36 |
| 11/01/2020<br>02:50 | 44.6 | 41   | 87.09 | 210 | 10 | 30.36 |
| 11/01/2020<br>03:20 | 46.4 | 41   | 81.34 | 210 | 8  | 30.33 |
| 11/01/2020<br>03:50 | 46.4 | 41   | 81.34 | 200 | 9  | 30.33 |
| 11/01/2020<br>04:20 | 46.4 | 42.8 | 87.19 | 210 | 9  | 30.33 |
| 11/01/2020<br>04:50 | 48.2 | 42.8 | 81.47 | 210 | 13 | 30.33 |
| 11/01/2020<br>05:20 | 48.2 | 42.8 | 81.47 | 210 | 12 | 30.3  |
| 11/01/2020<br>05:50 | 48.2 | 42.8 | 81.47 | 210 | 10 | 30.3  |
| 11/01/2020<br>06:20 | 48.2 | 42.8 | 81.47 | 210 | 11 | 30.3  |
| 11/01/2020<br>06:50 | 48.2 | 42.8 | 81.47 | 210 | 12 | 30.3  |
| 11/01/2020<br>07:20 | 48.2 | 42.8 | 81.47 | 210 | 12 | 30.27 |
| 11/01/2020<br>07:50 | 50   | 42.8 | 76.18 | 220 | 12 | 30.27 |
| 11/01/2020<br>08:20 | 50   | 42.8 | 76.18 | 220 | 15 | 30.27 |
| 11/01/2020<br>08:50 | 50   | 42.8 | 76.18 | 210 | 12 | 30.27 |
| 11/01/2020<br>09:20 | 50   | 44.6 | 81.61 | 220 | 14 | 30.27 |
| 11/01/2020<br>09:50 | 50   | 44.6 | 81.61 | 230 | 16 | 30.27 |
| 11/01/2020<br>10:20 | 50   | 46.4 | 87.37 | 220 | 13 | 30.27 |
| 11/01/2020<br>10:50 | 48.2 | 46.4 | 93.45 | 220 | 14 | 30.27 |
| 11/01/2020<br>11:20 | 50   | 46.4 | 87.37 | 220 | 14 | 30.27 |

|                     |      |      |       |     |    |       |
|---------------------|------|------|-------|-----|----|-------|
| 11/01/2020<br>11:50 | 48.2 | 48.2 | 100   | 210 | 16 | 30.24 |
| 11/01/2020<br>12:20 | 50   | 46.4 | 87.37 | 210 | 18 | 30.21 |
| 11/01/2020<br>12:50 | 50   | 46.4 | 87.37 | 220 | 18 | 30.21 |
| 11/01/2020<br>13:20 | 50   | 46.4 | 87.37 | 220 | 19 | 30.21 |
| 11/01/2020<br>13:50 | 50   | 46.4 | 87.37 | 220 | 14 | 30.18 |
| 11/01/2020<br>14:20 | 50   | 46.4 | 87.37 | 220 | 14 | 30.18 |
| 11/01/2020<br>14:50 | 50   | 46.4 | 87.37 | 210 | 15 | 30.18 |
| 11/01/2020<br>15:20 | 50   | 46.4 | 87.37 | 220 | 16 | 30.18 |
| 11/01/2020<br>15:50 | 51.8 | 46.4 | 81.74 | 220 | 16 | 30.18 |
| 11/01/2020<br>16:20 | 51.8 | 46.4 | 81.74 | 230 | 17 | 30.18 |
| 11/01/2020<br>16:50 | 51.8 | 46.4 | 81.74 | 220 | 19 | 30.15 |
| 11/01/2020<br>17:20 | 51.8 | 44.6 | 76.34 | 220 | 18 | 30.15 |
| 11/01/2020<br>17:50 | 51.8 | 44.6 | 76.34 | 220 | 15 | 30.15 |
| 11/01/2020<br>18:20 | 51.8 | 46.4 | 81.74 | 220 | 18 | 30.15 |
| 11/01/2020<br>18:50 | 50   | 46.4 | 87.37 | 220 | 17 | 30.15 |
| 11/01/2020<br>19:20 | 50   | 46.4 | 87.37 | 220 | 17 | 30.15 |
| 11/01/2020<br>19:50 | 50   | 46.4 | 87.37 | 230 | 17 | 30.15 |
| 11/01/2020<br>20:20 | 51.8 | 46.4 | 81.74 | 220 | 18 | 30.12 |
| 11/01/2020<br>20:50 | 51.8 | 44.6 | 76.34 | 220 | 18 | 30.12 |
| 11/01/2020<br>21:20 | 51.8 | 44.6 | 76.34 | 220 | 18 | 30.12 |
| 11/01/2020<br>21:50 | 51.8 | 44.6 | 76.34 | 220 | 21 | 30.12 |
| 11/01/2020<br>22:20 | 51.8 | 44.6 | 76.34 | 220 | 19 | 30.09 |
| 11/01/2020<br>22:50 | 51.8 | 44.6 | 76.34 | 220 | 18 | 30.09 |
| 11/01/2020<br>23:20 | 50   | 46.4 | 87.37 | 220 | 17 | 30.09 |

|                     |      |      |       |     |    |       |
|---------------------|------|------|-------|-----|----|-------|
| 11/01/2020<br>23:50 | 50   | 46.4 | 87.37 | 210 | 17 | 30.09 |
| 12/01/2020<br>00:20 | 50   | 46.4 | 87.37 | 210 | 14 | 30.06 |
| 12/01/2020<br>00:50 | 50   | 46.4 | 87.37 | 220 | 16 | 30.06 |
| 12/01/2020<br>01:20 | 50   | 46.4 | 87.37 | 220 | 15 | 30.06 |
| 12/01/2020<br>01:50 | 50   | 48.2 | 93.5  | 210 | 12 | 30.06 |
| 12/01/2020<br>02:20 | 50   | 48.2 | 93.5  | 210 | 14 | 30.03 |
| 12/01/2020<br>02:50 | 50   | 48.2 | 93.5  | 210 | 14 | 30.03 |
| 12/01/2020<br>03:20 | 50   | 48.2 | 93.5  | 210 | 17 | 30.03 |
| 12/01/2020<br>03:50 | 50   | 48.2 | 93.5  | 210 | 15 | 30    |
| 12/01/2020<br>04:20 | 50   | 48.2 | 93.5  | 210 | 15 | 30    |
| 12/01/2020<br>04:50 | 50   | 48.2 | 93.5  | 210 | 13 | 30    |
| 12/01/2020<br>05:20 | 50   | 48.2 | 93.5  | 200 | 13 | 29.97 |
| 12/01/2020<br>05:50 | 50   | 50   | 100   | 210 | 12 | 29.97 |
| 12/01/2020<br>06:20 | 50   | 50   | 100   | 220 | 12 | 29.97 |
| 12/01/2020<br>06:50 | 51.8 | 50   | 93.55 | 230 | 16 | 29.97 |
| 12/01/2020<br>07:20 | 51.8 | 50   | 93.55 | 230 | 16 | 29.97 |
| 12/01/2020<br>07:50 | 51.8 | 50   | 93.55 | 220 | 14 | 29.97 |
| 12/01/2020<br>08:20 | 51.8 | 48.2 | 87.47 | 230 | 16 | 29.97 |
| 12/01/2020<br>08:50 | 51.8 | 48.2 | 87.47 | 230 | 16 | 29.97 |
| 12/01/2020<br>09:20 | 51.8 | 48.2 | 87.47 | 250 | 18 | 30    |
| 12/01/2020<br>09:50 | 51.8 | 44.6 | 76.34 | 250 | 17 | 30.03 |
| 12/01/2020<br>10:20 | 51.8 | 44.6 | 76.34 | 250 | 17 | 30.03 |
| 12/01/2020<br>10:50 | 51.8 | 44.6 | 76.34 | 240 | 19 | 30.03 |
| 12/01/2020<br>11:20 | 51.8 | 44.6 | 76.34 | 240 | 19 | 30.03 |

|                     |      |      |       |     |    |       |
|---------------------|------|------|-------|-----|----|-------|
| 12/01/2020<br>11:50 | 51.8 | 44.6 | 76.34 | 250 | 20 | 30.06 |
| 12/01/2020<br>12:20 | 51.8 | 44.6 | 76.34 | 250 | 19 | 30.06 |
| 12/01/2020<br>12:50 | 51.8 | 42.8 | 71.26 | 260 | 17 | 30.06 |
| 12/01/2020<br>13:20 | 50   | 44.6 | 81.61 | 270 | 17 | 30.06 |
| 12/01/2020<br>13:50 | 51.8 | 41   | 66.48 | 260 | 17 | 30.06 |
| 12/01/2020<br>14:20 | 51.8 | 39.2 | 61.99 | 250 | 18 | 30.09 |
| 12/01/2020<br>14:50 | 51.8 | 39.2 | 61.99 | 250 | 17 | 30.09 |
| 12/01/2020<br>15:20 | 50   | 39.2 | 66.27 | 260 | 16 | 30.09 |
| 12/01/2020<br>15:50 | 48.2 | 39.2 | 70.88 | 270 | 14 | 30.09 |
| 12/01/2020<br>16:20 | 50   | 41   | 71.07 | 250 | 12 | 30.12 |
| 12/01/2020<br>16:50 | 48.2 | 39.2 | 70.88 | 240 | 11 | 30.12 |
| 12/01/2020<br>17:20 | 48.2 | 41   | 76.01 | 250 | 10 | 30.12 |
| 12/01/2020<br>17:50 | 46.4 | 41   | 81.34 | 230 | 10 | 30.12 |
| 12/01/2020<br>18:20 | 46.4 | 41   | 81.34 | 240 | 10 | 30.15 |
| 12/01/2020<br>18:50 | 44.6 | 41   | 87.09 | 230 | 8  | 30.15 |
| 12/01/2020<br>19:20 | 44.6 | 41   | 87.09 | 220 | 8  | 30.15 |
| 12/01/2020<br>19:50 | 44.6 | 41   | 87.09 | 210 | 9  | 30.15 |
| 12/01/2020<br>20:20 | 44.6 | 41   | 87.09 | 220 | 8  | 30.15 |
| 12/01/2020<br>20:50 | 42.8 | 41   | 93.3  | 210 | 8  | 30.15 |
| 12/01/2020<br>21:20 | 42.8 | 41   | 93.3  | 220 | 8  | 30.15 |
| 12/01/2020<br>21:50 | 42.8 | 41   | 93.3  | 220 | 9  | 30.15 |
| 12/01/2020<br>22:20 | 42.8 | 39.2 | 86.99 | 220 | 8  | 30.12 |
| 12/01/2020<br>22:50 | 42.8 | 39.2 | 86.99 | 220 | 7  | 30.12 |
| 12/01/2020<br>23:20 | 42.8 | 39.2 | 86.99 | 210 | 5  | 30.12 |



|                     |      |      |       |     |    |       |
|---------------------|------|------|-------|-----|----|-------|
| 12/01/2020<br>23:50 | 41   | 39.2 | 93.24 | 220 | 5  | 30.12 |
| 13/01/2020<br>00:20 | 41   | 41   | 100   | 190 | 5  | 30.12 |
| 13/01/2020<br>00:50 | 42.8 | 41   | 93.3  | 190 | 8  | 30.09 |
| 13/01/2020<br>01:20 | 42.8 | 41   | 93.3  | 200 | 7  | 30.09 |
| 13/01/2020<br>01:50 | 44.6 | 42.8 | 93.35 | 200 | 7  | 30.09 |
| 13/01/2020<br>02:20 | 44.6 | 42.8 | 93.35 | 190 | 6  | 30.06 |
| 13/01/2020<br>02:50 | 44.6 | 42.8 | 93.35 | 180 | 5  | 30.03 |
| 13/01/2020<br>03:20 | 44.6 | 42.8 | 93.35 | 200 | 8  | 30.03 |
| 13/01/2020<br>03:50 | 44.6 | 42.8 | 93.35 | 200 | 10 | 30.03 |
| 13/01/2020<br>04:20 | 44.6 | 42.8 | 93.35 | 210 | 8  | 30    |
| 13/01/2020<br>04:50 | 44.6 | 42.8 | 93.35 | 210 | 6  | 30    |
| 13/01/2020<br>05:20 | 42.8 | 41   | 93.3  | 200 | 5  | 30    |
| 13/01/2020<br>05:50 | 44.6 | 42.8 | 93.35 | 200 | 7  | 29.97 |
| 13/01/2020<br>06:20 | 44.6 | 42.8 | 93.35 | 200 | 7  | 29.97 |
| 13/01/2020<br>06:50 | 44.6 | 42.8 | 93.35 | 190 | 8  | 29.97 |
| 13/01/2020<br>07:20 | 44.6 | 42.8 | 93.35 | 190 | 8  | 29.94 |
| 13/01/2020<br>07:50 | 44.6 | 44.6 | 100   | 180 | 6  | 29.94 |
| 13/01/2020<br>08:20 | 44.6 | 44.6 | 100   | 170 | 6  | 29.94 |
| 13/01/2020<br>08:50 | 46.4 | 44.6 | 93.4  | 180 | 9  | 29.91 |
| 13/01/2020<br>09:20 | 46.4 | 44.6 | 93.4  | 180 | 12 | 29.88 |
| 13/01/2020<br>09:50 | 48.2 | 44.6 | 87.28 | 190 | 14 | 29.88 |
| 13/01/2020<br>10:20 | 48.2 | 44.6 | 87.28 | 190 | 14 | 29.85 |
| 13/01/2020<br>10:50 | 48.2 | 42.8 | 81.47 | 180 | 14 | 29.85 |
| 13/01/2020<br>11:20 | 48.2 | 42.8 | 81.47 | 190 | 13 | 29.83 |

|                     |      |      |       |     |    |       |
|---------------------|------|------|-------|-----|----|-------|
| 13/01/2020<br>11:50 | 48.2 | 42.8 | 81.47 | 190 | 13 | 29.8  |
| 13/01/2020<br>12:20 | 48.2 | 42.8 | 81.47 | 200 | 14 | 29.77 |
| 13/01/2020<br>12:50 | 48.2 | 42.8 | 81.47 | 200 | 15 | 29.74 |
| 13/01/2020<br>13:20 | 48.2 | 42.8 | 81.47 | 190 | 15 | 29.71 |
| 13/01/2020<br>13:50 | 48.2 | 42.8 | 81.47 | 200 | 16 | 29.68 |
| 13/01/2020<br>14:20 | 48.2 | 42.8 | 81.47 | 190 | 16 | 29.65 |
| 13/01/2020<br>14:50 | 48.2 | 42.8 | 81.47 | 190 | 17 | 29.62 |
| 13/01/2020<br>15:20 | 48.2 | 44.6 | 87.28 | 200 | 15 | 29.59 |
| 13/01/2020<br>15:50 | 48.2 | 46.4 | 93.45 | 200 | 14 | 29.56 |
| 13/01/2020<br>16:20 | 48.2 | 46.4 | 93.45 | 200 | 17 | 29.53 |
| 13/01/2020<br>16:50 | 50   | 46.4 | 87.37 | 200 | 20 | 29.5  |
| 13/01/2020<br>17:20 | 51.8 | 46.4 | 81.74 | 200 | 20 | 29.5  |
| 13/01/2020<br>17:50 | 50   | 48.2 | 93.5  | 200 | 19 | 29.47 |
| 13/01/2020<br>18:20 | 50   | 48.2 | 93.5  | 200 | 21 | 29.47 |
| 13/01/2020<br>18:50 | 50   | 48.2 | 93.5  | 200 | 21 | 29.44 |
| 13/01/2020<br>19:20 | 51.8 | 48.2 | 87.47 | 200 | 22 | 29.41 |
| 13/01/2020<br>19:50 | 51.8 | 50   | 93.55 | 200 | 24 | 29.41 |
| 13/01/2020<br>20:20 | 51.8 | 50   | 93.55 | 200 | 23 | 29.38 |
| 13/01/2020<br>20:50 | 51.8 | 50   | 93.55 | 210 | 21 | 29.38 |
| 13/01/2020<br>21:20 | 48.2 | 46.4 | 93.45 | 270 | 15 | 29.41 |
| 13/01/2020<br>21:50 | 46.4 | 44.6 | 93.4  | 260 | 17 | 29.41 |
| 13/01/2020<br>22:20 | 46.4 | 44.6 | 93.4  | 250 | 11 | 29.44 |
| 13/01/2020<br>22:50 | 46.4 | 44.6 | 93.4  | 230 | 15 | 29.44 |
| 13/01/2020<br>23:20 | 46.4 | 42.8 | 87.19 | 220 | 11 | 29.44 |

|                     |      |      |       |     |    |       |
|---------------------|------|------|-------|-----|----|-------|
| 13/01/2020<br>23:50 | 46.4 | 42.8 | 87.19 | 210 | 11 | 29.44 |
| 14/01/2020<br>00:20 | 46.4 | 42.8 | 87.19 | 220 | 11 | 29.44 |
| 14/01/2020<br>00:50 | 46.4 | 42.8 | 87.19 | 220 | 11 | 29.44 |
| 14/01/2020<br>01:20 | 46.4 | 44.6 | 93.4  | 230 | 12 | 29.44 |
| 14/01/2020<br>01:50 | 44.6 | 44.6 | 100   | 210 | 9  | 29.44 |
| 14/01/2020<br>02:20 | 46.4 | 44.6 | 93.4  | 210 | 8  | 29.44 |
| 14/01/2020<br>02:50 | 46.4 | 44.6 | 93.4  | 220 | 9  | 29.44 |
| 14/01/2020<br>03:20 | 46.4 | 44.6 | 93.4  | 210 | 8  | 29.44 |
| 14/01/2020<br>03:50 | 46.4 | 44.6 | 93.4  | 210 | 9  | 29.44 |
| 14/01/2020<br>04:20 | 46.4 | 44.6 | 93.4  | 210 | 7  | 29.47 |
| 14/01/2020<br>04:50 | 46.4 | 44.6 | 93.4  | 210 | 7  | 29.47 |
| 14/01/2020<br>05:20 | 46.4 | 42.8 | 87.19 | 210 | 8  | 29.47 |
| 14/01/2020<br>05:50 | 46.4 | 42.8 | 87.19 | 210 | 9  | 29.47 |
| 14/01/2020<br>06:20 | 46.4 | 41   | 81.34 | 210 | 9  | 29.5  |
| 14/01/2020<br>06:50 | 46.4 | 41   | 81.34 | 220 | 10 | 29.5  |
| 14/01/2020<br>07:20 | 46.4 | 41   | 81.34 | 210 | 12 | 29.47 |
| 14/01/2020<br>07:50 | 46.4 | 42.8 | 87.19 | 200 | 8  | 29.47 |
| 14/01/2020<br>08:20 | 46.4 | 42.8 | 87.19 | 190 | 10 | 29.47 |
| 14/01/2020<br>08:50 | 46.4 | 44.6 | 93.4  | 200 | 10 | 29.47 |
| 14/01/2020<br>09:20 | 48.2 | 46.4 | 93.45 | 200 | 11 | 29.47 |
| 14/01/2020<br>09:50 | 48.2 | 46.4 | 93.45 | 200 | 11 | 29.47 |
| 14/01/2020<br>10:20 | 50   | 46.4 | 87.37 | 190 | 11 | 29.47 |
| 14/01/2020<br>10:50 | 50   | 46.4 | 87.37 | 200 | 13 | 29.44 |
| 14/01/2020<br>11:20 | 50   | 46.4 | 87.37 | 200 | 14 | 29.41 |

|                     |      |      |       |     |    |       |
|---------------------|------|------|-------|-----|----|-------|
| 14/01/2020<br>11:50 | 50   | 48.2 | 93.5  | 190 | 18 | 29.38 |
| 14/01/2020<br>12:20 | 51.8 | 48.2 | 87.47 | 190 | 16 | 29.38 |
| 14/01/2020<br>12:50 | 51.8 | 50   | 93.55 | 190 | 16 | 29.35 |
| 14/01/2020<br>13:20 | 53.6 | 51.8 | 93.6  | 200 | 19 | 29.32 |
| 14/01/2020<br>13:50 | 53.6 | 53.6 | 100   | 210 | 20 | 29.32 |
| 14/01/2020<br>14:20 | 55.4 | 53.6 | 93.65 | 210 | 19 | 29.29 |
| 14/01/2020<br>14:50 | 55.4 | 53.6 | 93.65 | 210 | 19 | 29.29 |
| 14/01/2020<br>15:20 | 55.4 | 55.4 | 100   | 210 | 21 | 29.32 |
| 14/01/2020<br>15:50 | 55.4 | 53.6 | 93.65 | 210 | 18 | 29.32 |
| 14/01/2020<br>16:20 | 55.4 | 53.6 | 93.65 | 210 | 21 | 29.32 |
| 14/01/2020<br>16:50 | 55.4 | 53.6 | 93.65 | 210 | 19 | 29.32 |
| 14/01/2020<br>17:20 | 55.4 | 53.6 | 93.65 | 210 | 22 | 29.32 |
| 14/01/2020<br>17:50 | 55.4 | 53.6 | 93.65 | 200 | 22 | 29.35 |
| 14/01/2020<br>18:20 | 53.6 | 53.6 | 100   | 200 | 21 | 29.35 |
| 14/01/2020<br>18:50 | 53.6 | 53.6 | 100   | 210 | 21 | 29.35 |
| 14/01/2020<br>19:20 | 53.6 | 53.6 | 100   | 210 | 22 | 29.35 |
| 14/01/2020<br>19:50 | 53.6 | 53.6 | 100   | 210 | 24 | 29.35 |
| 14/01/2020<br>20:20 | 53.6 | 53.6 | 100   | 220 | 22 | 29.38 |
| 14/01/2020<br>20:50 | 53.6 | 53.6 | 100   | 210 | 25 | 29.38 |
| 14/01/2020<br>21:20 | 53.6 | 51.8 | 93.6  | 210 | 23 | 29.38 |
| 14/01/2020<br>21:50 | 53.6 | 51.8 | 93.6  | 210 | 19 | 29.41 |
| 14/01/2020<br>22:20 | 53.6 | 51.8 | 93.6  | 220 | 20 | 29.41 |
| 14/01/2020<br>22:50 | 53.6 | 51.8 | 93.6  | 210 | 20 | 29.41 |
| 14/01/2020<br>23:20 | 53.6 | 51.8 | 93.6  | 220 | 19 | 29.41 |

|                     |      |      |       |     |    |       |
|---------------------|------|------|-------|-----|----|-------|
| 14/01/2020<br>23:50 | 53.6 | 51.8 | 93.6  | 210 | 21 | 29.41 |
| 15/01/2020<br>00:20 | 53.6 | 51.8 | 93.6  | 210 | 22 | 29.41 |
| 15/01/2020<br>00:50 | 53.6 | 51.8 | 93.6  | 210 | 22 | 29.41 |
| 15/01/2020<br>01:20 | 55.4 | 51.8 | 87.65 | 210 | 21 | 29.41 |
| 15/01/2020<br>01:50 | 53.6 | 51.8 | 93.6  | 220 | 21 | 29.44 |
| 15/01/2020<br>02:20 | 53.6 | 51.8 | 93.6  | 220 | 21 | 29.44 |
| 15/01/2020<br>02:50 | 53.6 | 51.8 | 93.6  | 220 | 19 | 29.47 |
| 15/01/2020<br>03:20 | 48.2 | 46.4 | 93.45 | 280 | 11 | 29.5  |
| 15/01/2020<br>03:50 | 46.4 | 46.4 | 100   | 280 | 9  | 29.5  |
| 15/01/2020<br>04:20 | 46.4 | 46.4 | 100   | 270 | 8  | 29.53 |
| 15/01/2020<br>04:50 | 46.4 | 46.4 | 100   | 250 | 5  | 29.53 |
| 15/01/2020<br>05:20 | 46.4 | 46.4 | 100   | 230 | 6  | 29.53 |
| 15/01/2020<br>05:50 | 46.4 | 46.4 | 100   | 240 | 8  | 29.56 |
| 15/01/2020<br>06:20 | 46.4 | 46.4 | 100   | 260 | 8  | 29.56 |
| 15/01/2020<br>06:50 | 44.6 | 44.6 | 100   | 270 | 9  | 29.56 |
| 15/01/2020<br>07:20 | 44.6 | 44.6 | 100   | 270 | 9  | 29.59 |
| 15/01/2020<br>07:50 | 44.6 | 44.6 | 100   | 250 | 10 | 29.59 |
| 15/01/2020<br>08:20 | 44.6 | 42.8 | 93.35 | 230 | 10 | 29.62 |
| 15/01/2020<br>08:50 | 44.6 | 42.8 | 93.35 | 220 | 10 | 29.62 |
| 15/01/2020<br>09:20 | 44.6 | 41   | 87.09 | 210 | 10 | 29.65 |
| 15/01/2020<br>09:50 | 44.6 | 41   | 87.09 | 190 | 9  | 29.65 |
| 15/01/2020<br>10:20 | 44.6 | 42.8 | 93.35 | 190 | 10 | 29.68 |
| 15/01/2020<br>10:50 | 44.6 | 42.8 | 93.35 | 210 | 10 | 29.68 |
| 15/01/2020<br>11:20 | 44.6 | 42.8 | 93.35 | 210 | 9  | 29.71 |

|                     |      |      |       |     |    |       |
|---------------------|------|------|-------|-----|----|-------|
| 15/01/2020<br>11:50 | 44.6 | 42.8 | 93.35 | 220 | 11 | 29.74 |
| 15/01/2020<br>12:20 | 46.4 | 42.8 | 87.19 | 230 | 12 | 29.74 |
| 15/01/2020<br>12:50 | 46.4 | 42.8 | 87.19 | 230 | 10 | 29.74 |
| 15/01/2020<br>13:20 | 48.2 | 44.6 | 87.28 | 230 | 12 | 29.77 |
| 15/01/2020<br>13:50 | 48.2 | 44.6 | 87.28 | 220 | 12 | 29.77 |
| 15/01/2020<br>14:20 | 50   | 42.8 | 76.18 | 240 | 15 | 29.8  |
| 15/01/2020<br>14:50 | 50   | 41   | 71.07 | 250 | 14 | 29.83 |
| 15/01/2020<br>15:20 | 50   | 41   | 71.07 | 250 | 12 | 29.83 |
| 15/01/2020<br>15:50 | 48.2 | 37.4 | 66.05 | 240 | 11 | 29.85 |
| 15/01/2020<br>16:20 | 48.2 | 37.4 | 66.05 | 240 | 12 | 29.88 |
| 15/01/2020<br>16:50 | 48.2 | 37.4 | 66.05 | 230 | 11 | 29.88 |
| 15/01/2020<br>17:20 | 46.4 | 37.4 | 70.68 | 220 | 9  | 29.91 |
| 15/01/2020<br>17:50 | 46.4 | 39.2 | 75.84 | 220 | 9  | 29.94 |
| 15/01/2020<br>18:20 | 46.4 | 39.2 | 75.84 | 220 | 9  | 29.94 |
| 15/01/2020<br>18:50 | 44.6 | 39.2 | 81.2  | 220 | 11 | 29.97 |
| 15/01/2020<br>19:20 | 44.6 | 39.2 | 81.2  | 210 | 10 | 30    |
| 15/01/2020<br>19:50 | 44.6 | 39.2 | 81.2  | 210 | 10 | 30    |
| 15/01/2020<br>20:20 | 46.4 | 39.2 | 75.84 | 210 | 11 | 30    |
| 15/01/2020<br>20:50 | 44.6 | 39.2 | 81.2  | 210 | 10 | 30.03 |
| 15/01/2020<br>21:20 | 44.6 | 39.2 | 81.2  | 200 | 10 | 30.03 |
| 15/01/2020<br>21:50 | 44.6 | 39.2 | 81.2  | 200 | 8  | 30.03 |
| 15/01/2020<br>22:20 | 44.6 | 41   | 87.09 | 210 | 8  | 30.06 |
| 15/01/2020<br>22:50 | 44.6 | 41   | 87.09 | 210 | 7  | 30.06 |
| 15/01/2020<br>23:20 | 44.6 | 41   | 87.09 | 200 | 8  | 30.06 |

|                     |      |      |       |     |    |       |
|---------------------|------|------|-------|-----|----|-------|
| 16/01/2020<br>00:50 | 44.6 | 41   | 87.09 | 200 | 6  | 30.09 |
| 16/01/2020<br>01:20 | 44.6 | 41   | 87.09 | 180 | 6  | 30.09 |
| 16/01/2020<br>01:50 | 44.6 | 42.8 | 93.35 | 180 | 6  | 30.09 |
| 16/01/2020<br>02:20 | 44.6 | 42.8 | 93.35 | 180 | 8  | 30.09 |
| 16/01/2020<br>02:50 | 44.6 | 42.8 | 93.35 | 190 | 8  | 30.09 |
| 16/01/2020<br>03:20 | 44.6 | 42.8 | 93.35 | 190 | 6  | 30.09 |
| 16/01/2020<br>03:50 | 44.6 | 41   | 87.09 | 180 | 5  | 30.09 |
| 16/01/2020<br>04:20 | 42.8 | 41   | 93.3  | 150 | 5  | 30.09 |
| 16/01/2020<br>04:50 | 42.8 | 41   | 93.3  | 150 | 6  | 30.09 |
| 16/01/2020<br>05:20 | 42.8 | 41   | 93.3  | M   | 6  | 30.09 |
| 16/01/2020<br>05:50 | 42.8 | 41   | 93.3  | 150 | 6  | 30.06 |
| 16/01/2020<br>06:20 | 42.8 | 41   | 93.3  | 140 | 7  | 30.06 |
| 16/01/2020<br>06:50 | 42.8 | 42.8 | 100   | 160 | 8  | 30.06 |
| 16/01/2020<br>07:20 | 44.6 | 42.8 | 93.35 | 150 | 9  | 30.03 |
| 16/01/2020<br>07:50 | 44.6 | 42.8 | 93.35 | 150 | 8  | 30.03 |
| 16/01/2020<br>08:20 | 44.6 | 42.8 | 93.35 | 150 | 7  | 30.03 |
| 16/01/2020<br>08:50 | 46.4 | 44.6 | 93.4  | 170 | 12 | 30.03 |
| 16/01/2020<br>09:20 | 48.2 | 44.6 | 87.28 | 170 | 10 | 30.03 |
| 16/01/2020<br>09:50 | 48.2 | 44.6 | 87.28 | 160 | 11 | 30.03 |
| 16/01/2020<br>10:20 | 48.2 | 44.6 | 87.28 | 160 | 12 | 30    |
| 16/01/2020<br>10:50 | 48.2 | 44.6 | 87.28 | 150 | 12 | 30    |
| 16/01/2020<br>11:20 | 50   | 44.6 | 81.61 | 160 | 13 | 29.97 |
| 16/01/2020<br>11:50 | 50   | 46.4 | 87.37 | 150 | 14 | 29.94 |
| 16/01/2020<br>12:20 | 50   | 46.4 | 87.37 | 150 | 11 | 29.94 |

|                     |      |      |       |     |    |       |
|---------------------|------|------|-------|-----|----|-------|
| 16/01/2020<br>12:50 | 50   | 46.4 | 87.37 | 180 | 13 | 29.91 |
| 16/01/2020<br>13:20 | 50   | 46.4 | 87.37 | 170 | 13 | 29.88 |
| 16/01/2020<br>13:50 | 50   | 46.4 | 87.37 | 170 | 13 | 29.85 |
| 16/01/2020<br>14:20 | 51.8 | 46.4 | 81.74 | 170 | 13 | 29.85 |
| 16/01/2020<br>14:50 | 51.8 | 46.4 | 81.74 | 180 | 13 | 29.85 |
| 16/01/2020<br>15:20 | 51.8 | 46.4 | 81.74 | 190 | 16 | 29.85 |
| 16/01/2020<br>15:50 | 51.8 | 46.4 | 81.74 | 180 | 15 | 29.83 |
| 16/01/2020<br>16:20 | 53.6 | 46.4 | 76.5  | 180 | 16 | 29.83 |
| 16/01/2020<br>16:50 | 53.6 | 46.4 | 76.5  | 170 | 13 | 29.83 |
| 16/01/2020<br>17:20 | 53.6 | 44.6 | 71.45 | 170 | 13 | 29.8  |
| 16/01/2020<br>17:50 | 53.6 | 46.4 | 76.5  | 190 | 15 | 29.8  |
| 16/01/2020<br>18:20 | 53.6 | 48.2 | 81.87 | 180 | 14 | 29.8  |
| 16/01/2020<br>18:50 | 55.4 | 48.2 | 76.66 | 190 | 16 | 29.8  |
| 16/01/2020<br>19:20 | 53.6 | 50   | 87.56 | 190 | 17 | 29.8  |
| 16/01/2020<br>19:50 | 51.8 | 50   | 93.55 | 190 | 16 | 29.8  |
| 16/01/2020<br>20:20 | 51.8 | 50   | 93.55 | 190 | 16 | 29.8  |
| 16/01/2020<br>20:50 | 53.6 | 50   | 87.56 | 200 | 17 | 29.8  |
| 16/01/2020<br>21:20 | 53.6 | 51.8 | 93.6  | 210 | 15 | 29.8  |
| 16/01/2020<br>21:50 | 51.8 | 50   | 93.55 | 200 | 11 | 29.83 |
| 16/01/2020<br>22:20 | 51.8 | 50   | 93.55 | 200 | 11 | 29.83 |
| 16/01/2020<br>22:50 | 51.8 | 50   | 93.55 | 200 | 9  | 29.83 |
| 16/01/2020<br>23:20 | 51.8 | 50   | 93.55 | 170 | 9  | 29.8  |
| 16/01/2020<br>23:50 | 51.8 | 50   | 93.55 | 200 | 8  | 29.83 |
| 17/01/2020<br>00:20 | 51.8 | 50   | 93.55 | 200 | 8  | 29.83 |



|                     |      |      |       |     |    |       |
|---------------------|------|------|-------|-----|----|-------|
| 17/01/2020<br>00:50 | 50   | 50   | 100   | 200 | 6  | 29.8  |
| 17/01/2020<br>01:20 | 50   | 50   | 100   | 190 | 6  | 29.8  |
| 17/01/2020<br>01:50 | 50   | 50   | 100   | 190 | 6  | 29.8  |
| 17/01/2020<br>02:20 | 50   | 50   | 100   | 190 | 6  | 29.8  |
| 17/01/2020<br>02:50 | 50   | 50   | 100   | 190 | 8  | 29.8  |
| 17/01/2020<br>03:20 | 50   | 50   | 100   | 190 | 8  | 29.8  |
| 17/01/2020<br>03:50 | 50   | 48.2 | 93.5  | 190 | 7  | 29.77 |
| 17/01/2020<br>04:20 | 50   | 48.2 | 93.5  | 200 | 9  | 29.77 |
| 17/01/2020<br>04:50 | 50   | 48.2 | 93.5  | 190 | 7  | 29.77 |
| 17/01/2020<br>05:20 | 50   | 48.2 | 93.5  | 190 | 10 | 29.77 |
| 17/01/2020<br>05:50 | 46.4 | 44.6 | 93.4  | 250 | 16 | 29.8  |
| 17/01/2020<br>06:20 | 46.4 | 44.6 | 93.4  | 220 | 7  | 29.77 |
| 17/01/2020<br>06:50 | 46.4 | 44.6 | 93.4  | 210 | 8  | 29.77 |
| 17/01/2020<br>07:20 | 46.4 | 44.6 | 93.4  | 210 | 9  | 29.8  |
| 17/01/2020<br>07:50 | 46.4 | 44.6 | 93.4  | 210 | 7  | 29.8  |
| 17/01/2020<br>08:20 | 46.4 | 44.6 | 93.4  | 210 | 9  | 29.8  |
| 17/01/2020<br>08:50 | 46.4 | 44.6 | 93.4  | 210 | 9  | 29.8  |
| 17/01/2020<br>09:20 | 48.2 | 44.6 | 87.28 | 210 | 10 | 29.8  |
| 17/01/2020<br>09:50 | 48.2 | 44.6 | 87.28 | 210 | 12 | 29.8  |
| 17/01/2020<br>10:20 | 48.2 | 42.8 | 81.47 | 220 | 14 | 29.8  |
| 17/01/2020<br>10:50 | 48.2 | 42.8 | 81.47 | 240 | 17 | 29.83 |
| 17/01/2020<br>11:20 | 48.2 | 42.8 | 81.47 | 240 | 16 | 29.83 |
| 17/01/2020<br>11:50 | 46.4 | 39.2 | 75.84 | 250 | 24 | 29.85 |
| 17/01/2020<br>12:20 | 46.4 | 39.2 | 75.84 | 260 | 22 | 29.85 |

|                     |      |      |       |     |    |       |
|---------------------|------|------|-------|-----|----|-------|
| 17/01/2020<br>12:50 | 46.4 | 37.4 | 70.68 | 270 | 22 | 29.88 |
| 17/01/2020<br>13:20 | 44.6 | 37.4 | 75.68 | 270 | 21 | 29.91 |
| 17/01/2020<br>13:50 | 46.4 | 35.6 | 65.83 | 280 | 17 | 29.91 |
| 17/01/2020<br>14:20 | 44.6 | 35.6 | 70.48 | 280 | 14 | 29.94 |
| 17/01/2020<br>14:50 | 44.6 | 35.6 | 70.48 | 270 | 14 | 29.94 |
| 17/01/2020<br>15:20 | 44.6 | 37.4 | 75.68 | 260 | 15 | 29.97 |
| 17/01/2020<br>15:50 | 44.6 | 37.4 | 75.68 | 260 | 13 | 30    |
| 17/01/2020<br>16:20 | 44.6 | 37.4 | 75.68 | 250 | 12 | 30    |
| 17/01/2020<br>16:50 | 42.8 | 37.4 | 81.07 | 240 | 11 | 30    |
| 17/01/2020<br>17:20 | 42.8 | 35.6 | 75.5  | 250 | 10 | 30.03 |
| 17/01/2020<br>17:50 | 42.8 | 35.6 | 75.5  | 240 | 10 | 30.03 |
| 17/01/2020<br>18:20 | 41   | 37.4 | 86.89 | 230 | 9  | 30.03 |
| 17/01/2020<br>18:50 | 41   | 37.4 | 86.89 | 230 | 8  | 30.03 |
| 17/01/2020<br>19:20 | 41   | 37.4 | 86.89 | 220 | 10 | 30.06 |
| 17/01/2020<br>19:50 | 41   | 35.6 | 80.93 | 230 | 10 | 30.06 |
| 17/01/2020<br>20:20 | 41   | 35.6 | 80.93 | 240 | 10 | 30.06 |
| 17/01/2020<br>20:50 | 39.2 | 35.6 | 86.79 | 240 | 9  | 30.06 |
| 17/01/2020<br>21:20 | 41   | 35.6 | 80.93 | 240 | 9  | 30.06 |
| 17/01/2020<br>21:50 | 39.2 | 35.6 | 86.79 | 250 | 9  | 30.09 |
| 17/01/2020<br>22:20 | 39.2 | 35.6 | 86.79 | 260 | 8  | 30.09 |
| 17/01/2020<br>22:50 | 39.2 | 35.6 | 86.79 | 270 | 9  | 30.09 |
| 17/01/2020<br>23:20 | 37.4 | 35.6 | 93.14 | 260 | 8  | 30.12 |
| 17/01/2020<br>23:50 | 37.4 | 35.6 | 93.14 | 270 | 8  | 30.12 |
| 18/01/2020<br>00:20 | 37.4 | 35.6 | 93.14 | 270 | 8  | 30.15 |

|                     |      |      |       |     |   |       |
|---------------------|------|------|-------|-----|---|-------|
| 18/01/2020<br>00:50 | 35.6 | 33.8 | 93.08 | 270 | 6 | 30.15 |
| 18/01/2020<br>01:20 | 35.6 | 35.6 | 100   | 270 | 6 | 30.15 |
| 18/01/2020<br>01:50 | 35.6 | 33.8 | 93.08 | 270 | 8 | 30.18 |
| 18/01/2020<br>02:20 | 35.6 | 33.8 | 93.08 | 280 | 6 | 30.18 |
| 18/01/2020<br>02:50 | 33.8 | 33.8 | 100   | 280 | 6 | 30.18 |
| 18/01/2020<br>03:20 | 35.6 | 35.6 | 100   | 270 | 7 | 30.21 |
| 18/01/2020<br>03:50 | 35.6 | 35.6 | 100   | 280 | 6 | 30.21 |
| 18/01/2020<br>04:20 | 35.6 | 33.8 | 93.08 | 280 | 6 | 30.21 |
| 18/01/2020<br>04:50 | 33.8 | 33.8 | 100   | 270 | 6 | 30.21 |
| 18/01/2020<br>05:20 | 33.8 | 33.8 | 100   | 270 | 6 | 30.24 |
| 18/01/2020<br>05:50 | 35.6 | 33.8 | 93.08 | 270 | 6 | 30.24 |
| 18/01/2020<br>06:20 | 33.8 | 33.8 | 100   | 270 | 6 | 30.27 |
| 18/01/2020<br>06:50 | 35.6 | 33.8 | 93.08 | 270 | 7 | 30.27 |
| 18/01/2020<br>07:20 | 35.6 | 33.8 | 93.08 | 270 | 7 | 30.3  |
| 18/01/2020<br>07:50 | 33.8 | 33.8 | 100   | 290 | 4 | 30.3  |
| 18/01/2020<br>08:20 | 35.6 | 33.8 | 93.08 | 270 | 6 | 30.3  |
| 18/01/2020<br>08:50 | 35.6 | 33.8 | 93.08 | 280 | 6 | 30.3  |
| 18/01/2020<br>09:20 | 37.4 | 35.6 | 93.14 | 280 | 6 | 30.33 |
| 18/01/2020<br>09:50 | 37.4 | 35.6 | 93.14 | 280 | 5 | 30.33 |
| 18/01/2020<br>10:20 | 39.2 | 35.6 | 86.79 | 280 | 6 | 30.33 |
| 18/01/2020<br>10:50 | 41   | 37.4 | 86.89 | M   | 3 | 30.36 |
| 18/01/2020<br>11:20 | 41   | 37.4 | 86.89 | 270 | 6 | 30.36 |
| 18/01/2020<br>11:50 | 42.8 | 37.4 | 81.07 | 280 | 5 | 30.36 |
| 18/01/2020<br>12:20 | 42.8 | 37.4 | 81.07 | 260 | 8 | 30.36 |

|                     |      |      |       |     |   |       |
|---------------------|------|------|-------|-----|---|-------|
| 18/01/2020<br>12:50 | 44.6 | 35.6 | 70.48 | 260 | 7 | 30.36 |
| 18/01/2020<br>13:20 | 44.6 | 35.6 | 70.48 | 310 | 5 | 30.39 |
| 18/01/2020<br>13:50 | 44.6 | 35.6 | 70.48 | 340 | 6 | 30.39 |
| 18/01/2020<br>14:20 | 44.6 | 33.8 | 65.61 | 310 | 7 | 30.39 |
| 18/01/2020<br>14:50 | 44.6 | 33.8 | 65.61 | 310 | 7 | 30.39 |
| 18/01/2020<br>15:20 | 44.6 | 33.8 | 65.61 | 320 | 5 | 30.42 |
| 18/01/2020<br>15:50 | 44.6 | 33.8 | 65.61 | 310 | 4 | 30.42 |
| 18/01/2020<br>16:20 | 42.8 | 33.8 | 70.28 | M   | 2 | 30.42 |
| 18/01/2020<br>16:50 | 42.8 | 33.8 | 70.28 | M   | 2 | 30.45 |
| 18/01/2020<br>17:20 | 41   | 33.8 | 75.33 | 320 | 3 | 30.45 |
| 18/01/2020<br>17:50 | 42.8 | 33.8 | 70.28 | 310 | 3 | 30.47 |
| 18/01/2020<br>18:20 | 41   | 33.8 | 75.33 | 300 | 3 | 30.47 |
| 18/01/2020<br>18:50 | 41   | 33.8 | 75.33 | 290 | 4 | 30.47 |
| 18/01/2020<br>19:20 | 41   | 33.8 | 75.33 | 300 | 3 | 30.5  |
| 18/01/2020<br>19:50 | 41   | 33.8 | 75.33 | 290 | 3 | 30.5  |
| 18/01/2020<br>20:20 | 39.2 | 33.8 | 80.79 | 290 | 4 | 30.5  |
| 18/01/2020<br>20:50 | 39.2 | 33.8 | 80.79 | 300 | 5 | 30.53 |
| 18/01/2020<br>21:20 | 39.2 | 33.8 | 80.79 | 310 | 4 | 30.53 |
| 18/01/2020<br>21:50 | 39.2 | 33.8 | 80.79 | 300 | 3 | 30.53 |
| 18/01/2020<br>22:20 | 39.2 | 33.8 | 80.79 | 290 | 2 | 30.56 |
| 18/01/2020<br>22:50 | 37.4 | 33.8 | 86.69 | M   | 2 | 30.56 |
| 18/01/2020<br>23:20 | 37.4 | 33.8 | 86.69 | 290 | 3 | 30.56 |
| 18/01/2020<br>23:50 | 35.6 | 32   | 86.59 | 290 | 4 | 30.59 |
| 19/01/2020<br>00:20 | 35.6 | 32   | 86.59 | 290 | 4 | 30.62 |

|                     |      |      |       |     |   |       |
|---------------------|------|------|-------|-----|---|-------|
| 19/01/2020<br>00:50 | 33.8 | 32   | 93.03 | 290 | 3 | 30.62 |
| 19/01/2020<br>01:20 | 33.8 | 32   | 93.03 | M   | 2 | 30.62 |
| 19/01/2020<br>01:50 | 32   | 30.2 | 92.97 | 290 | 3 | 30.65 |
| 19/01/2020<br>02:20 | 32   | 32   | 100   | 310 | 2 | 30.68 |
| 19/01/2020<br>02:50 | 33.8 | 32   | 93.03 | 310 | 2 | 30.68 |
| 19/01/2020<br>03:20 | 32   | 32   | 100   | M   | 1 | 30.68 |
| 19/01/2020<br>03:50 | 33.8 | 32   | 93.03 | 310 | 2 | 30.68 |
| 19/01/2020<br>04:20 | 32   | 32   | 100   | 310 | 2 | 30.71 |
| 19/01/2020<br>04:50 | 33.8 | 32   | 93.03 | 300 | 3 | 30.71 |
| 19/01/2020<br>05:20 | 33.8 | 32   | 93.03 | 300 | 3 | 30.71 |
| 19/01/2020<br>05:50 | 32   | 30.2 | 92.97 | 300 | 3 | 30.74 |
| 19/01/2020<br>06:20 | 33.8 | 32   | 93.03 | 290 | 3 | 30.74 |
| 19/01/2020<br>06:50 | 33.8 | 32   | 93.03 | 310 | 4 | 30.77 |
| 19/01/2020<br>07:20 | 35.6 | 32   | 86.59 | 280 | 1 | 30.77 |
| 19/01/2020<br>07:50 | 33.8 | 30.2 | 86.49 | 280 | 3 | 30.8  |
| 19/01/2020<br>08:20 | 33.8 | 30.2 | 86.49 | 280 | 2 | 30.8  |
| 19/01/2020<br>08:50 | 33.8 | 30.2 | 86.49 | 270 | 2 | 30.83 |
| 19/01/2020<br>09:20 | 33.8 | 32   | 93.03 | 280 | 4 | 30.83 |
| 19/01/2020<br>09:50 | 37.4 | 32   | 80.65 | 300 | 3 | 30.86 |
| 19/01/2020<br>10:20 | 37.4 | 32   | 80.65 | M   | 3 | 30.86 |
| 19/01/2020<br>10:50 | 39.2 | 32   | 75.16 | 300 | 5 | 30.86 |
| 19/01/2020<br>11:20 | 41   | 33.8 | 75.33 | 290 | 5 | 30.86 |
| 19/01/2020<br>11:50 | 41   | 33.8 | 75.33 | 300 | 4 | 30.89 |
| 19/01/2020<br>12:20 | 42.8 | 35.6 | 75.5  | M   | 2 | 30.89 |

|                     |      |      |       |     |   |       |
|---------------------|------|------|-------|-----|---|-------|
| 19/01/2020<br>12:50 | 44.6 | 35.6 | 70.48 | 360 | 4 | 30.89 |
| 19/01/2020<br>13:20 | 44.6 | 35.6 | 70.48 | 340 | 4 | 30.89 |
| 19/01/2020<br>13:50 | 44.6 | 35.6 | 70.48 | 310 | 4 | 30.89 |
| 19/01/2020<br>14:20 | 44.6 | 35.6 | 70.48 | 340 | 4 | 30.89 |
| 19/01/2020<br>14:50 | 44.6 | 35.6 | 70.48 | M   | 3 | 30.89 |
| 19/01/2020<br>15:20 | 44.6 | 35.6 | 70.48 | M   | 3 | 30.89 |
| 19/01/2020<br>15:50 | 44.6 | 35.6 | 70.48 | M   | 2 | 30.92 |
| 19/01/2020<br>16:20 | 44.6 | 35.6 | 70.48 | 310 | 3 | 30.92 |
| 19/01/2020<br>16:50 | 42.8 | 33.8 | 70.28 | M   | 3 | 30.92 |
| 19/01/2020<br>17:20 | 41   | 33.8 | 75.33 | M   | 3 | 30.92 |
| 19/01/2020<br>17:50 | 41   | 33.8 | 75.33 | M   | 2 | 30.95 |
| 19/01/2020<br>18:20 | 41   | 33.8 | 75.33 | M   | 2 | 30.95 |
| 19/01/2020<br>18:50 | 41   | 33.8 | 75.33 | M   | 1 | 30.95 |
| 19/01/2020<br>19:20 | 41   | 33.8 | 75.33 | 330 | 1 | 30.95 |
| 19/01/2020<br>19:50 | 39.2 | 33.8 | 80.79 | 0   | 0 | 30.95 |
| 19/01/2020<br>20:20 | 37.4 | 33.8 | 86.69 | 310 | 3 | 30.98 |
| 19/01/2020<br>20:50 | 39.2 | 33.8 | 80.79 | 310 | 2 | 30.98 |
| 19/01/2020<br>21:20 | 35.6 | 32   | 86.59 | M   | 1 | 30.98 |
| 19/01/2020<br>21:50 | 35.6 | 32   | 86.59 | M   | 3 | 30.98 |
| 19/01/2020<br>22:20 | 32   | 30.2 | 92.97 | M   | 2 | 30.98 |
| 19/01/2020<br>22:50 | 33.8 | 33.8 | 100   | M   | 2 | 30.98 |
| 19/01/2020<br>23:20 | 33.8 | 32   | 93.03 | M   | 2 | 30.98 |
| 19/01/2020<br>23:50 | 33.8 | 32   | 93.03 | 280 | 3 | 30.98 |
| 20/01/2020<br>00:20 | 33.8 | 33.8 | 100   | M   | 2 | 30.98 |

|                     |      |      |       |     |   |       |
|---------------------|------|------|-------|-----|---|-------|
| 20/01/2020<br>00:50 | 33.8 | 33.8 | 100   | 300 | 2 | 30.98 |
| 20/01/2020<br>01:20 | 33.8 | 32   | 93.03 | M   | 2 | 30.98 |
| 20/01/2020<br>01:50 | 33.8 | 32   | 93.03 | 280 | 5 | 30.98 |
| 20/01/2020<br>02:20 | 33.8 | 32   | 93.03 | M   | 2 | 30.98 |
| 20/01/2020<br>02:50 | 33.8 | 33.8 | 100   | 310 | 3 | 30.98 |
| 20/01/2020<br>03:20 | 35.6 | 33.8 | 93.08 | M   | 3 | 30.98 |
| 20/01/2020<br>03:50 | 33.8 | 32   | 93.03 | M   | 2 | 30.98 |
| 20/01/2020<br>04:20 | 33.8 | 32   | 93.03 | 280 | 2 | 30.98 |
| 20/01/2020<br>04:50 | 33.8 | 32   | 93.03 | M   | 3 | 30.95 |
| 20/01/2020<br>05:20 | 33.8 | 32   | 93.03 | M   | 3 | 30.98 |
| 20/01/2020<br>05:50 | 33.8 | 32   | 93.03 | M   | 2 | 30.98 |
| 20/01/2020<br>06:20 | 33.8 | 33.8 | 100   | M   | 3 | 30.98 |
| 20/01/2020<br>06:50 | 35.6 | 33.8 | 93.08 | M   | 3 | 30.98 |
| 20/01/2020<br>07:20 | 33.8 | 33.8 | 100   | M   | 2 | 30.98 |
| 20/01/2020<br>07:50 | 35.6 | 33.8 | 93.08 | M   | 3 | 30.98 |
| 20/01/2020<br>08:20 | 35.6 | 33.8 | 93.08 | M   | 2 | 30.98 |
| 20/01/2020<br>08:50 | 35.6 | 33.8 | 93.08 | M   | 3 | 30.98 |
| 20/01/2020<br>09:20 | 37.4 | 33.8 | 86.69 | M   | 3 | 30.98 |
| 20/01/2020<br>09:50 | 37.4 | 33.8 | 86.69 | M   | 3 | 30.98 |
| 20/01/2020<br>10:20 | 37.4 | 35.6 | 93.14 | M   | 3 | 30.98 |
| 20/01/2020<br>10:50 | 39.2 | 35.6 | 86.79 | M   | 3 | 30.98 |
| 20/01/2020<br>11:20 | 41   | 35.6 | 80.93 | 270 | 4 | 30.95 |
| 20/01/2020<br>11:50 | 41   | 35.6 | 80.93 | M   | 3 | 30.95 |
| 20/01/2020<br>12:20 | 41   | 35.6 | 80.93 | M   | 3 | 30.95 |

|                     |      |      |       |     |   |       |
|---------------------|------|------|-------|-----|---|-------|
| 20/01/2020<br>12:50 | 42.8 | 37.4 | 81.07 | 260 | 4 | 30.95 |
| 20/01/2020<br>13:20 | 44.6 | 37.4 | 75.68 | M   | 3 | 30.95 |
| 20/01/2020<br>13:50 | 44.6 | 35.6 | 70.48 | 230 | 4 | 30.92 |
| 20/01/2020<br>14:20 | 46.4 | 37.4 | 70.68 | 230 | 4 | 30.92 |
| 20/01/2020<br>14:50 | 46.4 | 35.6 | 65.83 | 230 | 4 | 30.92 |
| 20/01/2020<br>15:20 | 46.4 | 35.6 | 65.83 | 250 | 4 | 30.92 |
| 20/01/2020<br>15:50 | 44.6 | 35.6 | 70.48 | 280 | 4 | 30.89 |
| 20/01/2020<br>16:20 | 42.8 | 33.8 | 70.28 | 260 | 5 | 30.89 |
| 20/01/2020<br>16:50 | 42.8 | 35.6 | 75.5  | 230 | 6 | 30.89 |
| 20/01/2020<br>17:20 | 41   | 35.6 | 80.93 | 220 | 4 | 30.89 |
| 20/01/2020<br>17:50 | 39.2 | 33.8 | 80.79 | 230 | 5 | 30.89 |
| 20/01/2020<br>18:20 | 39.2 | 33.8 | 80.79 | 300 | 3 | 30.89 |
| 20/01/2020<br>18:50 | 39.2 | 35.6 | 86.79 | 290 | 2 | 30.89 |
| 20/01/2020<br>19:20 | 37.4 | 33.8 | 86.69 | 300 | 4 | 30.89 |
| 20/01/2020<br>19:50 | 35.6 | 33.8 | 93.08 | 300 | 3 | 30.86 |
| 20/01/2020<br>20:20 | 37.4 | 33.8 | 86.69 | 290 | 3 | 30.86 |
| 20/01/2020<br>20:50 | 35.6 | 33.8 | 93.08 | 270 | 5 | 30.86 |
| 20/01/2020<br>21:20 | 33.8 | 32   | 93.03 | 310 | 5 | 30.86 |
| 20/01/2020<br>21:50 | 35.6 | 33.8 | 93.08 | 310 | 1 | 30.86 |
| 20/01/2020<br>22:20 | 33.8 | 32   | 93.03 | M   | 1 | 30.86 |
| 20/01/2020<br>22:50 | 33.8 | 32   | 93.03 | 320 | 2 | 30.86 |
| 20/01/2020<br>23:20 | 33.8 | 32   | 93.03 | 170 | 2 | 30.86 |
| 20/01/2020<br>23:50 | 33.8 | 32   | 93.03 | 270 | 3 | 30.86 |
| 21/01/2020<br>00:20 | 32   | 30.2 | 92.97 | M   | 3 | 30.83 |



|                     |      |      |       |     |   |       |
|---------------------|------|------|-------|-----|---|-------|
| 21/01/2020<br>00:50 | 32   | 32   | 100   | 180 | 3 | 30.83 |
| 21/01/2020<br>01:20 | 32   | 30.2 | 92.97 | 190 | 2 | 30.83 |
| 21/01/2020<br>01:50 | 32   | 30.2 | 92.97 | 170 | 1 | 30.83 |
| 21/01/2020<br>02:20 | 30.2 | 30.2 | 100   | 290 | 2 | 30.83 |
| 21/01/2020<br>02:50 | 30.2 | 30.2 | 100   | 320 | 2 | 30.8  |
| 21/01/2020<br>03:20 | 32   | 30.2 | 92.97 | 310 | 2 | 30.8  |
| 21/01/2020<br>03:50 | 28.4 | 28.4 | 100   | 300 | 3 | 30.8  |
| 21/01/2020<br>04:20 | 30.2 | 30.2 | 100   | 300 | 3 | 30.8  |
| 21/01/2020<br>04:50 | 30.2 | 30.2 | 100   | M   | 2 | 30.8  |
| 21/01/2020<br>05:20 | 30.2 | 30.2 | 100   | 260 | 4 | 30.8  |
| 21/01/2020<br>05:50 | 30.2 | 30.2 | 100   | 270 | 4 | 30.8  |
| 21/01/2020<br>06:20 | 28.4 | 28.4 | 100   | M   | 2 | 30.8  |
| 21/01/2020<br>06:50 | 30.2 | 30.2 | 100   | M   | 2 | 30.77 |
| 21/01/2020<br>07:20 | 30.2 | 30.2 | 100   | M   | 3 | 30.77 |
| 21/01/2020<br>07:50 | 30.2 | 30.2 | 100   | M   | 3 | 30.8  |
| 21/01/2020<br>08:20 | 30.2 | 30.2 | 100   | 310 | 4 | 30.8  |
| 21/01/2020<br>08:50 | 32   | 32   | 100   | 300 | 4 | 30.8  |
| 21/01/2020<br>09:20 | 33.8 | 33.8 | 100   | M   | 3 | 30.8  |
| 21/01/2020<br>09:50 | 35.6 | 33.8 | 93.08 | 270 | 3 | 30.8  |
| 21/01/2020<br>10:20 | 37.4 | 35.6 | 93.14 | 250 | 4 | 30.8  |
| 21/01/2020<br>10:50 | 37.4 | 35.6 | 93.14 | 190 | 5 | 30.8  |
| 21/01/2020<br>11:20 | 39.2 | 37.4 | 93.19 | 190 | 4 | 30.77 |
| 21/01/2020<br>11:50 | 41   | 37.4 | 86.89 | 190 | 4 | 30.77 |
| 21/01/2020<br>12:20 | 41   | 37.4 | 86.89 | 220 | 4 | 30.77 |

|                     |      |      |       |     |   |       |
|---------------------|------|------|-------|-----|---|-------|
| 21/01/2020<br>12:50 | 42.8 | 39.2 | 86.99 | 220 | 4 | 30.77 |
| 21/01/2020<br>13:20 | 44.6 | 39.2 | 81.2  | 280 | 5 | 30.74 |
| 21/01/2020<br>13:50 | 44.6 | 39.2 | 81.2  | 300 | 5 | 30.74 |
| 21/01/2020<br>14:20 | 46.4 | 39.2 | 75.84 | 290 | 4 | 30.74 |
| 21/01/2020<br>14:50 | 44.6 | 37.4 | 75.68 | 260 | 4 | 30.74 |
| 21/01/2020<br>15:20 | 44.6 | 37.4 | 75.68 | 280 | 5 | 30.71 |
| 21/01/2020<br>15:50 | 42.8 | 37.4 | 81.07 | 270 | 6 | 30.71 |
| 21/01/2020<br>16:20 | 41   | 37.4 | 86.89 | 280 | 4 | 30.71 |
| 21/01/2020<br>16:50 | 39.2 | 35.6 | 86.79 | 280 | 5 | 30.71 |
| 21/01/2020<br>17:20 | 41   | 37.4 | 86.89 | 300 | 3 | 30.71 |
| 21/01/2020<br>17:50 | 41   | 35.6 | 80.93 | 290 | 2 | 30.71 |
| 21/01/2020<br>18:20 | 39.2 | 35.6 | 86.79 | 280 | 4 | 30.71 |
| 21/01/2020<br>18:50 | 39.2 | 35.6 | 86.79 | 280 | 4 | 30.71 |
| 21/01/2020<br>19:20 | 37.4 | 35.6 | 93.14 | 300 | 4 | 30.71 |
| 21/01/2020<br>19:50 | 39.2 | 37.4 | 93.19 | 310 | 4 | 30.71 |
| 21/01/2020<br>20:20 | 37.4 | 35.6 | 93.14 | 300 | 3 | 30.71 |
| 21/01/2020<br>20:50 | 37.4 | 35.6 | 93.14 | 280 | 4 | 30.71 |
| 21/01/2020<br>21:20 | 37.4 | 35.6 | 93.14 | 250 | 6 | 30.68 |
| 21/01/2020<br>21:50 | 37.4 | 35.6 | 93.14 | 290 | 4 | 30.68 |
| 21/01/2020<br>22:20 | 35.6 | 35.6 | 100   | 310 | 4 | 30.71 |
| 21/01/2020<br>22:50 | 37.4 | 35.6 | 93.14 | 320 | 4 | 30.71 |
| 21/01/2020<br>23:20 | 37.4 | 35.6 | 93.14 | 290 | 3 | 30.71 |
| 21/01/2020<br>23:50 | 35.6 | 33.8 | 93.08 | 310 | 2 | 30.71 |
| 22/01/2020<br>00:20 | 33.8 | 33.8 | 100   | 300 | 2 | 30.71 |

|                     |      |      |       |     |   |       |
|---------------------|------|------|-------|-----|---|-------|
| 22/01/2020<br>00:50 | 33.8 | 33.8 | 100   | 270 | 2 | 30.68 |
| 22/01/2020<br>01:20 | 33.8 | 33.8 | 100   | M   | 1 | 30.68 |
| 22/01/2020<br>01:50 | 35.6 | 35.6 | 100   | 280 | 2 | 30.68 |
| 22/01/2020<br>02:20 | 35.6 | 35.6 | 100   | M   | 1 | 30.68 |
| 22/01/2020<br>02:50 | 37.4 | 35.6 | 93.14 | 280 | 1 | 30.65 |
| 22/01/2020<br>03:20 | 37.4 | 35.6 | 93.14 | 320 | 2 | 30.65 |
| 22/01/2020<br>03:50 | 37.4 | 35.6 | 93.14 | M   | 3 | 30.65 |
| 22/01/2020<br>04:20 | 37.4 | 37.4 | 100   | M   | 2 | 30.65 |
| 22/01/2020<br>04:50 | 39.2 | 37.4 | 93.19 | M   | 2 | 30.65 |
| 22/01/2020<br>05:20 | 39.2 | 39.2 | 100   | M   | 2 | 30.62 |
| 22/01/2020<br>05:50 | 39.2 | 39.2 | 100   | M   | 3 | 30.62 |
| 22/01/2020<br>06:20 | 39.2 | 39.2 | 100   | M   | 3 | 30.65 |
| 22/01/2020<br>06:50 | 39.2 | 39.2 | 100   | M   | 2 | 30.65 |
| 22/01/2020<br>07:20 | 41   | 39.2 | 93.24 | M   | 1 | 30.65 |
| 22/01/2020<br>07:50 | 41   | 39.2 | 93.24 | 160 | 1 | 30.65 |
| 22/01/2020<br>08:20 | 41   | 41   | 100   | M   | 1 | 30.65 |
| 22/01/2020<br>08:50 | 39.2 | 39.2 | 100   | M   | 1 | 30.65 |
| 22/01/2020<br>09:20 | 41   | 41   | 100   | 190 | 1 | 30.65 |
| 22/01/2020<br>09:50 | 41   | 41   | 100   | 190 | 1 | 30.65 |
| 22/01/2020<br>10:20 | 42.8 | 42.8 | 100   | 350 | 3 | 30.65 |
| 22/01/2020<br>10:50 | 42.8 | 42.8 | 100   | 90  | 1 | 30.65 |
| 22/01/2020<br>11:20 | 42.8 | 42.8 | 100   | M   | 2 | 30.65 |
| 22/01/2020<br>11:50 | 42.8 | 42.8 | 100   | 350 | 3 | 30.65 |
| 22/01/2020<br>12:20 | 44.6 | 42.8 | 93.35 | M   | 2 | 30.62 |

|                     |      |      |       |     |   |       |
|---------------------|------|------|-------|-----|---|-------|
| 22/01/2020<br>12:50 | 44.6 | 44.6 | 100   | M   | 2 | 30.62 |
| 22/01/2020<br>13:20 | 44.6 | 44.6 | 100   | M   | 2 | 30.62 |
| 22/01/2020<br>13:50 | 44.6 | 44.6 | 100   | M   | 2 | 30.62 |
| 22/01/2020<br>14:20 | 44.6 | 44.6 | 100   | M   | 2 | 30.62 |
| 22/01/2020<br>14:50 | 46.4 | 44.6 | 93.4  | M   | 2 | 30.62 |
| 22/01/2020<br>15:20 | 46.4 | 44.6 | 93.4  | M   | 2 | 30.59 |
| 22/01/2020<br>15:50 | 46.4 | 46.4 | 100   | M   | 3 | 30.59 |
| 22/01/2020<br>16:20 | 46.4 | 46.4 | 100   | M   | 3 | 30.59 |
| 22/01/2020<br>16:50 | 46.4 | 46.4 | 100   | M   | 3 | 30.62 |
| 22/01/2020<br>17:20 | 46.4 | 46.4 | 100   | 50  | 4 | 30.62 |
| 22/01/2020<br>17:50 | 46.4 | 44.6 | 93.4  | M   | 3 | 30.62 |
| 22/01/2020<br>18:20 | 44.6 | 44.6 | 100   | M   | 3 | 30.62 |
| 22/01/2020<br>18:50 | 46.4 | 44.6 | 93.4  | 80  | 2 | 30.62 |
| 22/01/2020<br>19:20 | 46.4 | 44.6 | 93.4  | 70  | 3 | 30.62 |
| 22/01/2020<br>19:50 | 46.4 | 44.6 | 93.4  | 70  | 4 | 30.62 |
| 22/01/2020<br>20:20 | 46.4 | 44.6 | 93.4  | 80  | 5 | 30.62 |
| 22/01/2020<br>20:50 | 46.4 | 44.6 | 93.4  | 80  | 4 | 30.62 |
| 22/01/2020<br>21:20 | 44.6 | 44.6 | 100   | 110 | 5 | 30.59 |
| 22/01/2020<br>21:50 | 44.6 | 42.8 | 93.35 | 120 | 8 | 30.59 |
| 22/01/2020<br>22:20 | 44.6 | 42.8 | 93.35 | 120 | 7 | 30.59 |
| 22/01/2020<br>22:50 | 44.6 | 42.8 | 93.35 | 100 | 4 | 30.59 |
| 22/01/2020<br>23:20 | 44.6 | 42.8 | 93.35 | 110 | 4 | 30.59 |
| 22/01/2020<br>23:50 | 44.6 | 42.8 | 93.35 | 110 | 7 | 30.59 |
| 23/01/2020<br>00:20 | 44.6 | 42.8 | 93.35 | 90  | 4 | 30.59 |

|                     |      |      |       |     |   |       |
|---------------------|------|------|-------|-----|---|-------|
| 23/01/2020<br>00:50 | 44.6 | 42.8 | 93.35 | 100 | 4 | 30.59 |
| 23/01/2020<br>01:20 | 44.6 | 42.8 | 93.35 | 100 | 4 | 30.56 |
| 23/01/2020<br>01:50 | 44.6 | 42.8 | 93.35 | 100 | 4 | 30.56 |
| 23/01/2020<br>02:20 | 44.6 | 42.8 | 93.35 | 90  | 5 | 30.56 |
| 23/01/2020<br>02:50 | 44.6 | 42.8 | 93.35 | 90  | 6 | 30.56 |
| 23/01/2020<br>03:20 | 44.6 | 42.8 | 93.35 | 100 | 5 | 30.56 |
| 23/01/2020<br>03:50 | 44.6 | 42.8 | 93.35 | 70  | 4 | 30.53 |
| 23/01/2020<br>04:20 | 44.6 | 42.8 | 93.35 | 100 | 5 | 30.53 |
| 23/01/2020<br>04:50 | 44.6 | 42.8 | 93.35 | 60  | 3 | 30.53 |
| 23/01/2020<br>05:20 | 44.6 | 42.8 | 93.35 | 110 | 4 | 30.5  |
| 23/01/2020<br>05:50 | 44.6 | 42.8 | 93.35 | 40  | 2 | 30.5  |
| 23/01/2020<br>06:20 | 44.6 | 42.8 | 93.35 | M   | 2 | 30.5  |
| 23/01/2020<br>06:50 | 44.6 | 42.8 | 93.35 | M   | 2 | 30.5  |
| 23/01/2020<br>07:20 | 44.6 | 42.8 | 93.35 | M   | 2 | 30.5  |
| 23/01/2020<br>07:50 | 44.6 | 42.8 | 93.35 | M   | 2 | 30.5  |
| 23/01/2020<br>08:20 | 44.6 | 42.8 | 93.35 | M   | 2 | 30.5  |
| 23/01/2020<br>08:50 | 44.6 | 42.8 | 93.35 | 130 | 5 | 30.5  |
| 23/01/2020<br>09:20 | 44.6 | 42.8 | 93.35 | 110 | 5 | 30.5  |
| 23/01/2020<br>09:50 | 46.4 | 42.8 | 87.19 | 100 | 4 | 30.5  |
| 23/01/2020<br>10:20 | 46.4 | 42.8 | 87.19 | M   | 3 | 30.5  |
| 23/01/2020<br>10:50 | 46.4 | 42.8 | 87.19 | 110 | 4 | 30.5  |
| 23/01/2020<br>11:20 | 46.4 | 42.8 | 87.19 | 100 | 4 | 30.47 |
| 23/01/2020<br>11:50 | 46.4 | 42.8 | 87.19 | 120 | 5 | 30.47 |
| 23/01/2020<br>12:20 | 46.4 | 42.8 | 87.19 | 160 | 4 | 30.45 |

|                     |      |      |       |     |   |       |
|---------------------|------|------|-------|-----|---|-------|
| 23/01/2020<br>12:50 | 46.4 | 42.8 | 87.19 | M   | 2 | 30.45 |
| 23/01/2020<br>13:20 | 46.4 | 42.8 | 87.19 | M   | 3 | 30.45 |
| 23/01/2020<br>13:50 | 46.4 | 42.8 | 87.19 | 70  | 4 | 30.42 |
| 23/01/2020<br>14:20 | 46.4 | 42.8 | 87.19 | M   | 3 | 30.42 |
| 23/01/2020<br>14:50 | 46.4 | 42.8 | 87.19 | M   | 2 | 30.39 |
| 23/01/2020<br>15:20 | 46.4 | 42.8 | 87.19 | M   | 2 | 30.39 |
| 23/01/2020<br>15:50 | 46.4 | 42.8 | 87.19 | M   | 1 | 30.39 |
| 23/01/2020<br>16:20 | 46.4 | 42.8 | 87.19 | M   | 2 | 30.36 |
| 23/01/2020<br>16:50 | 46.4 | 42.8 | 87.19 | M   | 2 | 30.36 |
| 23/01/2020<br>17:20 | 46.4 | 42.8 | 87.19 | 310 | 2 | 30.36 |
| 23/01/2020<br>17:50 | 46.4 | 42.8 | 87.19 | M   | 3 | 30.36 |
| 23/01/2020<br>18:20 | 44.6 | 42.8 | 93.35 | M   | 3 | 30.36 |
| 23/01/2020<br>18:50 | 44.6 | 42.8 | 93.35 | M   | 3 | 30.36 |
| 23/01/2020<br>19:20 | 44.6 | 42.8 | 93.35 | M   | 3 | 30.36 |
| 23/01/2020<br>19:50 | 44.6 | 42.8 | 93.35 | 320 | 3 | 30.33 |
| 23/01/2020<br>20:20 | 44.6 | 42.8 | 93.35 | M   | 3 | 30.33 |
| 23/01/2020<br>20:50 | 44.6 | 42.8 | 93.35 | M   | 2 | 30.33 |
| 23/01/2020<br>21:20 | 44.6 | 42.8 | 93.35 | M   | 3 | 30.33 |
| 23/01/2020<br>21:50 | 44.6 | 42.8 | 93.35 | 350 | 3 | 30.33 |
| 23/01/2020<br>22:20 | 44.6 | 42.8 | 93.35 | M   | 2 | 30.33 |
| 23/01/2020<br>22:50 | 44.6 | 41   | 87.09 | 310 | 4 | 30.33 |
| 23/01/2020<br>23:20 | 44.6 | 42.8 | 93.35 | M   | 2 | 30.3  |
| 23/01/2020<br>23:50 | 42.8 | 42.8 | 100   | M   | 3 | 50    |
| 24/01/2020<br>00:20 | 42.8 | 42.8 | 100   | M   | 2 | 30.3  |

|                     |      |      |       |     |   |       |
|---------------------|------|------|-------|-----|---|-------|
| 24/01/2020<br>00:50 | 42.8 | 42.8 | 100   | 320 | 3 | 30.3  |
| 24/01/2020<br>01:20 | 42.8 | 42.8 | 100   | 320 | 3 | 30.27 |
| 24/01/2020<br>01:50 | 42.8 | 42.8 | 100   | 350 | 3 | 30.27 |
| 24/01/2020<br>02:20 | 42.8 | 42.8 | 100   | M   | 3 | 30.27 |
| 24/01/2020<br>02:50 | 42.8 | 42.8 | 100   | M   | 3 | 30.27 |
| 24/01/2020<br>03:20 | 42.8 | 41   | 93.3  | M   | 3 | 30.24 |
| 24/01/2020<br>03:50 | 42.8 | 41   | 93.3  | M   | 3 | 30.24 |
| 24/01/2020<br>04:20 | 42.8 | 41   | 93.3  | 360 | 3 | 30.24 |
| 24/01/2020<br>04:50 | 42.8 | 41   | 93.3  | M   | 2 | 30.24 |
| 24/01/2020<br>05:20 | 42.8 | 41   | 93.3  | 350 | 2 | 30.21 |
| 24/01/2020<br>05:50 | 42.8 | 41   | 93.3  | M   | 2 | 30.21 |
| 24/01/2020<br>06:20 | 42.8 | 42.8 | 100   | M   | 2 | 30.24 |
| 24/01/2020<br>06:50 | 44.6 | 41   | 87.09 | M   | 2 | 30.24 |
| 24/01/2020<br>07:20 | 42.8 | 41   | 93.3  | 330 | 4 | 30.24 |
| 24/01/2020<br>07:50 | 42.8 | 41   | 93.3  | M   | 2 | 30.24 |
| 24/01/2020<br>08:20 | 42.8 | 41   | 93.3  | M   | 3 | 30.24 |
| 24/01/2020<br>08:50 | 42.8 | 41   | 93.3  | 300 | 3 | 30.24 |
| 24/01/2020<br>09:20 | 42.8 | 41   | 93.3  | M   | 2 | 30.24 |
| 24/01/2020<br>09:50 | 42.8 | 41   | 93.3  | M   | 3 | 30.24 |
| 24/01/2020<br>10:20 | 42.8 | 42.8 | 100   | M   | 2 | 30.24 |
| 24/01/2020<br>10:50 | 44.6 | 42.8 | 93.35 | 280 | 3 | 30.24 |
| 24/01/2020<br>11:20 | 44.6 | 42.8 | 93.35 | 290 | 3 | 30.24 |
| 24/01/2020<br>11:50 | 44.6 | 42.8 | 93.35 | M   | 2 | 30.21 |
| 24/01/2020<br>12:20 | 44.6 | 42.8 | 93.35 | M   | 2 | 30.21 |

|                     |      |      |       |     |   |       |
|---------------------|------|------|-------|-----|---|-------|
| 24/01/2020<br>12:50 | 44.6 | 42.8 | 93.35 | 210 | 4 | 30.21 |
| 24/01/2020<br>13:20 | 44.6 | 42.8 | 93.35 | 210 | 6 | 30.18 |
| 24/01/2020<br>13:50 | 44.6 | 42.8 | 93.35 | 230 | 5 | 30.18 |
| 24/01/2020<br>14:20 | 44.6 | 42.8 | 93.35 | 220 | 4 | 30.18 |
| 24/01/2020<br>14:50 | 44.6 | 42.8 | 93.35 | 220 | 5 | 30.18 |
| 24/01/2020<br>15:20 | 44.6 | 42.8 | 93.35 | 230 | 6 | 30.18 |
| 24/01/2020<br>15:50 | 44.6 | 42.8 | 93.35 | 260 | 6 | 30.18 |
| 24/01/2020<br>16:20 | 44.6 | 42.8 | 93.35 | 260 | 6 | 30.15 |
| 24/01/2020<br>16:50 | 44.6 | 42.8 | 93.35 | 250 | 6 | 30.15 |
| 24/01/2020<br>17:20 | 44.6 | 42.8 | 93.35 | 240 | 5 | 30.15 |
| 24/01/2020<br>17:50 | 44.6 | 42.8 | 93.35 | M   | 3 | 30.15 |
| 24/01/2020<br>18:20 | 44.6 | 42.8 | 93.35 | 240 | 4 | 30.15 |
| 24/01/2020<br>18:50 | 44.6 | 42.8 | 93.35 | 230 | 5 | 30.18 |
| 24/01/2020<br>19:20 | 42.8 | 42.8 | 100   | 220 | 5 | 30.18 |
| 24/01/2020<br>19:50 | 42.8 | 42.8 | 100   | 220 | 5 | 30.18 |
| 24/01/2020<br>20:20 | 42.8 | 42.8 | 100   | 200 | 5 | 30.18 |
| 24/01/2020<br>20:50 | 42.8 | 42.8 | 100   | 190 | 6 | 30.18 |
| 24/01/2020<br>21:20 | 42.8 | 42.8 | 100   | 220 | 6 | 30.18 |
| 24/01/2020<br>21:50 | 42.8 | 42.8 | 100   | 210 | 4 | 30.15 |
| 24/01/2020<br>22:20 | 42.8 | 42.8 | 100   | 210 | 7 | 30.15 |
| 24/01/2020<br>22:50 | 42.8 | 41   | 93.3  | 220 | 5 | 30.15 |
| 24/01/2020<br>23:20 | 42.8 | 41   | 93.3  | 200 | 4 | 30.15 |
| 24/01/2020<br>23:50 | 42.8 | 41   | 93.3  | 210 | 3 | 30.15 |
| 25/01/2020<br>00:20 | 42.8 | 41   | 93.3  | 210 | 3 | 30.15 |



|                     |      |      |       |     |    |       |
|---------------------|------|------|-------|-----|----|-------|
| 25/01/2020<br>00:50 | 42.8 | 41   | 93.3  | 220 | 5  | 30.15 |
| 25/01/2020<br>01:20 | 42.8 | 41   | 93.3  | 190 | 5  | 30.15 |
| 25/01/2020<br>01:50 | 42.8 | 41   | 93.3  | 200 | 4  | 30.15 |
| 25/01/2020<br>02:20 | 42.8 | 39.2 | 86.99 | 190 | 6  | 30.12 |
| 25/01/2020<br>02:50 | 42.8 | 39.2 | 86.99 | 210 | 6  | 30.12 |
| 25/01/2020<br>03:20 | 42.8 | 39.2 | 86.99 | 210 | 5  | 30.12 |
| 25/01/2020<br>03:50 | 42.8 | 37.4 | 81.07 | 240 | 5  | 30.12 |
| 25/01/2020<br>04:20 | 42.8 | 37.4 | 81.07 | 230 | 5  | 30.12 |
| 25/01/2020<br>04:50 | 42.8 | 37.4 | 81.07 | 190 | 5  | 30.12 |
| 25/01/2020<br>05:20 | 42.8 | 37.4 | 81.07 | 180 | 5  | 30.12 |
| 25/01/2020<br>05:50 | 42.8 | 37.4 | 81.07 | 190 | 3  | 30.12 |
| 25/01/2020<br>06:20 | 42.8 | 37.4 | 81.07 | 200 | 5  | 30.09 |
| 25/01/2020<br>06:50 | 42.8 | 39.2 | 86.99 | 190 | 4  | 30.09 |
| 25/01/2020<br>07:20 | 42.8 | 39.2 | 86.99 | 180 | 4  | 30.09 |
| 25/01/2020<br>07:50 | 42.8 | 39.2 | 86.99 | M   | 4  | 30.09 |
| 25/01/2020<br>08:20 | 42.8 | 39.2 | 86.99 | 190 | 4  | 30.12 |
| 25/01/2020<br>08:50 | 42.8 | 39.2 | 86.99 | 180 | 5  | 30.12 |
| 25/01/2020<br>09:20 | 42.8 | 41   | 93.3  | 180 | 7  | 30.12 |
| 25/01/2020<br>09:50 | 42.8 | 41   | 93.3  | 170 | 7  | 30.12 |
| 25/01/2020<br>10:20 | 42.8 | 41   | 93.3  | 170 | 6  | 30.12 |
| 25/01/2020<br>10:50 | 42.8 | 42.8 | 100   | 150 | 6  | 30.12 |
| 25/01/2020<br>11:20 | 42.8 | 41   | 93.3  | 140 | 8  | 30.09 |
| 25/01/2020<br>11:50 | 42.8 | 41   | 93.3  | 150 | 7  | 30.09 |
| 25/01/2020<br>12:20 | 42.8 | 41   | 93.3  | 180 | 10 | 30.09 |

|                     |      |      |       |     |   |       |
|---------------------|------|------|-------|-----|---|-------|
| 25/01/2020<br>12:50 | 42.8 | 41   | 93.3  | 170 | 8 | 30.09 |
| 25/01/2020<br>13:20 | 42.8 | 41   | 93.3  | 170 | 7 | 30.06 |
| 25/01/2020<br>13:50 | 42.8 | 42.8 | 100   | 160 | 6 | 30.06 |
| 25/01/2020<br>14:20 | 44.6 | 42.8 | 93.35 | 150 | 5 | 30.03 |
| 25/01/2020<br>14:50 | 42.8 | 41   | 93.3  | 140 | 7 | 30.03 |
| 25/01/2020<br>15:20 | 44.6 | 42.8 | 93.35 | 150 | 6 | 30.03 |
| 25/01/2020<br>15:50 | 44.6 | 41   | 87.09 | 170 | 7 | 30.03 |
| 25/01/2020<br>16:20 | 42.8 | 41   | 93.3  | 150 | 7 | 30    |
| 25/01/2020<br>16:50 | 42.8 | 41   | 93.3  | 140 | 7 | 30    |
| 25/01/2020<br>17:20 | 42.8 | 41   | 93.3  | 150 | 6 | 30    |
| 25/01/2020<br>17:50 | 42.8 | 41   | 93.3  | 140 | 6 | 30.03 |
| 25/01/2020<br>18:20 | 42.8 | 41   | 93.3  | 150 | 7 | 30.03 |
| 25/01/2020<br>18:50 | 42.8 | 41   | 93.3  | 140 | 7 | 30    |
| 25/01/2020<br>19:20 | 42.8 | 41   | 93.3  | 150 | 5 | 30    |
| 25/01/2020<br>19:50 | 42.8 | 41   | 93.3  | 140 | 6 | 30    |
| 25/01/2020<br>20:20 | 42.8 | 42.8 | 100   | 140 | 5 | 30    |
| 25/01/2020<br>20:50 | 42.8 | 42.8 | 100   | 130 | 5 | 30    |
| 25/01/2020<br>21:20 | 42.8 | 42.8 | 100   | 130 | 6 | 29.97 |
| 25/01/2020<br>21:50 | 42.8 | 42.8 | 100   | 130 | 5 | 29.97 |
| 25/01/2020<br>22:20 | 42.8 | 42.8 | 100   | 130 | 5 | 29.97 |
| 25/01/2020<br>22:50 | 42.8 | 42.8 | 100   | 130 | 5 | 29.94 |
| 25/01/2020<br>23:20 | 44.6 | 42.8 | 93.35 | 140 | 5 | 29.94 |
| 25/01/2020<br>23:50 | 44.6 | 42.8 | 93.35 | 140 | 6 | 29.94 |
| 26/01/2020<br>00:20 | 44.6 | 44.6 | 100   | 170 | 6 | 29.94 |

|                     |      |      |       |     |    |       |
|---------------------|------|------|-------|-----|----|-------|
| 26/01/2020<br>00:50 | 44.6 | 44.6 | 100   | 170 | 5  | 29.94 |
| 26/01/2020<br>01:20 | 44.6 | 44.6 | 100   | 200 | 4  | 29.94 |
| 26/01/2020<br>01:50 | 44.6 | 44.6 | 100   | 230 | 3  | 29.91 |
| 26/01/2020<br>02:20 | 44.6 | 44.6 | 100   | 170 | 5  | 29.91 |
| 26/01/2020<br>02:50 | 44.6 | 44.6 | 100   | 150 | 5  | 29.91 |
| 26/01/2020<br>03:20 | 44.6 | 42.8 | 93.35 | 170 | 5  | 29.91 |
| 26/01/2020<br>03:50 | 42.8 | 42.8 | 100   | 170 | 5  | 29.88 |
| 26/01/2020<br>04:20 | 44.6 | 44.6 | 100   | 160 | 7  | 29.88 |
| 26/01/2020<br>04:50 | 42.8 | 42.8 | 100   | 160 | 6  | 29.88 |
| 26/01/2020<br>05:20 | 44.6 | 42.8 | 93.35 | 190 | 6  | 29.88 |
| 26/01/2020<br>05:50 | 44.6 | 42.8 | 93.35 | 160 | 8  | 29.88 |
| 26/01/2020<br>06:20 | 44.6 | 42.8 | 93.35 | 180 | 7  | 29.88 |
| 26/01/2020<br>06:50 | 44.6 | 42.8 | 93.35 | 180 | 9  | 29.85 |
| 26/01/2020<br>07:20 | 44.6 | 42.8 | 93.35 | 180 | 10 | 29.85 |
| 26/01/2020<br>07:50 | 46.4 | 44.6 | 93.4  | 180 | 9  | 29.85 |
| 26/01/2020<br>08:20 | 46.4 | 44.6 | 93.4  | 180 | 12 | 29.85 |
| 26/01/2020<br>08:50 | 46.4 | 44.6 | 93.4  | 190 | 9  | 29.85 |
| 26/01/2020<br>09:20 | 48.2 | 46.4 | 93.45 | 190 | 9  | 29.85 |
| 26/01/2020<br>09:50 | 48.2 | 46.4 | 93.45 | 190 | 10 | 29.85 |
| 26/01/2020<br>10:20 | 48.2 | 46.4 | 93.45 | 200 | 10 | 29.85 |
| 26/01/2020<br>10:50 | 50   | 46.4 | 87.37 | 190 | 11 | 29.83 |
| 26/01/2020<br>11:20 | 50   | 46.4 | 87.37 | 190 | 11 | 29.83 |
| 26/01/2020<br>11:50 | 50   | 46.4 | 87.37 | 200 | 11 | 29.83 |
| 26/01/2020<br>12:20 | 50   | 44.6 | 81.61 | 200 | 12 | 29.8  |

|                     |      |      |       |     |    |       |
|---------------------|------|------|-------|-----|----|-------|
| 26/01/2020<br>12:50 | 50   | 44.6 | 81.61 | 200 | 13 | 29.8  |
| 26/01/2020<br>13:20 | 50   | 44.6 | 81.61 | 200 | 14 | 29.8  |
| 26/01/2020<br>13:50 | 50   | 46.4 | 87.37 | 190 | 11 | 29.77 |
| 26/01/2020<br>14:20 | 50   | 46.4 | 87.37 | 200 | 13 | 29.77 |
| 26/01/2020<br>14:50 | 50   | 46.4 | 87.37 | 200 | 13 | 29.77 |
| 26/01/2020<br>15:20 | 50   | 46.4 | 87.37 | 200 | 12 | 29.74 |
| 26/01/2020<br>15:50 | 48.2 | 48.2 | 100   | 210 | 12 | 29.74 |
| 26/01/2020<br>16:20 | 48.2 | 46.4 | 93.45 | 190 | 11 | 29.71 |
| 26/01/2020<br>16:50 | 48.2 | 46.4 | 93.45 | 200 | 13 | 29.71 |
| 26/01/2020<br>17:20 | 48.2 | 46.4 | 93.45 | 190 | 12 | 29.71 |
| 26/01/2020<br>17:50 | 48.2 | 48.2 | 100   | 200 | 12 | 29.71 |
| 26/01/2020<br>18:20 | 48.2 | 48.2 | 100   | 210 | 13 | 29.71 |
| 26/01/2020<br>18:50 | 50   | 48.2 | 93.5  | 220 | 10 | 29.71 |
| 26/01/2020<br>19:20 | 48.2 | 48.2 | 100   | 220 | 11 | 29.71 |
| 26/01/2020<br>19:50 | 48.2 | 48.2 | 100   | 210 | 9  | 29.71 |
| 26/01/2020<br>20:20 | 48.2 | 46.4 | 93.45 | 210 | 10 | 29.68 |
| 26/01/2020<br>20:50 | 48.2 | 46.4 | 93.45 | 220 | 10 | 29.71 |
| 26/01/2020<br>21:20 | 48.2 | 46.4 | 93.45 | 220 | 10 | 29.71 |
| 26/01/2020<br>21:50 | 46.4 | 46.4 | 100   | 220 | 10 | 29.71 |
| 26/01/2020<br>22:20 | 46.4 | 46.4 | 100   | 220 | 7  | 29.71 |
| 26/01/2020<br>22:50 | 46.4 | 44.6 | 93.4  | 220 | 6  | 29.71 |
| 26/01/2020<br>23:20 | 46.4 | 44.6 | 93.4  | 230 | 7  | 29.71 |
| 26/01/2020<br>23:50 | 46.4 | 44.6 | 93.4  | 210 | 6  | 29.71 |
| 27/01/2020<br>00:20 | 46.4 | 46.4 | 100   | 210 | 8  | 29.68 |

|                     |      |      |       |     |    |       |
|---------------------|------|------|-------|-----|----|-------|
| 27/01/2020<br>00:50 | 46.4 | 44.6 | 93.4  | 210 | 8  | 29.68 |
| 27/01/2020<br>01:20 | 46.4 | 44.6 | 93.4  | 210 | 8  | 29.68 |
| 27/01/2020<br>01:50 | 46.4 | 44.6 | 93.4  | 210 | 7  | 29.68 |
| 27/01/2020<br>02:20 | 46.4 | 44.6 | 93.4  | 220 | 8  | 29.68 |
| 27/01/2020<br>02:50 | 46.4 | 44.6 | 93.4  | 220 | 10 | 29.68 |
| 27/01/2020<br>03:20 | 46.4 | 44.6 | 93.4  | 210 | 7  | 29.65 |
| 27/01/2020<br>03:50 | 46.4 | 44.6 | 93.4  | 210 | 8  | 29.65 |
| 27/01/2020<br>04:20 | 46.4 | 44.6 | 93.4  | 210 | 8  | 29.65 |
| 27/01/2020<br>04:50 | 46.4 | 44.6 | 93.4  | 200 | 6  | 29.65 |
| 27/01/2020<br>05:20 | 46.4 | 44.6 | 93.4  | 210 | 8  | 29.62 |
| 27/01/2020<br>05:50 | 46.4 | 44.6 | 93.4  | 210 | 8  | 29.62 |
| 27/01/2020<br>06:20 | 46.4 | 44.6 | 93.4  | 200 | 12 | 29.62 |
| 27/01/2020<br>06:50 | 46.4 | 44.6 | 93.4  | 220 | 9  | 29.62 |
| 27/01/2020<br>07:20 | 46.4 | 44.6 | 93.4  | 220 | 7  | 29.62 |
| 27/01/2020<br>07:50 | 46.4 | 42.8 | 87.19 | 210 | 9  | 29.62 |
| 27/01/2020<br>08:20 | 44.6 | 42.8 | 93.35 | 210 | 10 | 29.62 |
| 27/01/2020<br>08:50 | 44.6 | 41   | 87.09 | 210 | 8  | 29.62 |
| 27/01/2020<br>09:20 | 44.6 | 42.8 | 93.35 | 210 | 9  | 29.62 |
| 27/01/2020<br>09:50 | 44.6 | 42.8 | 93.35 | 200 | 8  | 29.59 |
| 27/01/2020<br>10:20 | 46.4 | 42.8 | 87.19 | 210 | 9  | 29.59 |
| 27/01/2020<br>10:50 | 48.2 | 44.6 | 87.28 | 210 | 10 | 29.59 |
| 27/01/2020<br>11:20 | 48.2 | 44.6 | 87.28 | 210 | 9  | 29.59 |
| 27/01/2020<br>11:50 | 48.2 | 44.6 | 87.28 | 200 | 9  | 29.56 |
| 27/01/2020<br>12:20 | 48.2 | 44.6 | 87.28 | 210 | 8  | 29.53 |

|                     |      |      |       |     |    |       |
|---------------------|------|------|-------|-----|----|-------|
| 27/01/2020<br>12:50 | 48.2 | 44.6 | 87.28 | 220 | 7  | 29.53 |
| 27/01/2020<br>13:20 | 48.2 | 44.6 | 87.28 | 220 | 10 | 29.5  |
| 27/01/2020<br>13:50 | 48.2 | 44.6 | 87.28 | 200 | 7  | 29.47 |
| 27/01/2020<br>14:20 | 46.4 | 42.8 | 87.19 | 240 | 9  | 29.47 |
| 27/01/2020<br>14:50 | 44.6 | 42.8 | 93.35 | 250 | 13 | 29.47 |
| 27/01/2020<br>15:20 | 42.8 | 41   | 93.3  | 240 | 7  | 29.44 |
| 27/01/2020<br>15:50 | 42.8 | 41   | 93.3  | 250 | 6  | 29.44 |
| 27/01/2020<br>16:20 | 42.8 | 41   | 93.3  | 250 | 5  | 29.41 |
| 27/01/2020<br>16:50 | 42.8 | 41   | 93.3  | 220 | 5  | 29.38 |
| 27/01/2020<br>17:20 | 41   | 39.2 | 93.24 | 150 | 5  | 29.38 |
| 27/01/2020<br>17:50 | 42.8 | 41   | 93.3  | 180 | 7  | 29.38 |
| 27/01/2020<br>18:20 | 41   | 41   | 100   | 180 | 8  | 29.35 |
| 27/01/2020<br>18:50 | 42.8 | 41   | 93.3  | 200 | 8  | 29.35 |
| 27/01/2020<br>19:20 | 42.8 | 41   | 93.3  | 210 | 9  | 29.35 |
| 27/01/2020<br>19:50 | 42.8 | 41   | 93.3  | 210 | 9  | 29.32 |
| 27/01/2020<br>20:20 | 42.8 | 41   | 93.3  | 210 | 8  | 29.32 |
| 27/01/2020<br>20:50 | 42.8 | 41   | 93.3  | 220 | 8  | 29.32 |
| 27/01/2020<br>21:20 | 42.8 | 41   | 93.3  | 210 | 7  | 29.32 |
| 27/01/2020<br>21:50 | 42.8 | 41   | 93.3  | 210 | 9  | 29.29 |
| 27/01/2020<br>22:20 | 42.8 | 41   | 93.3  | 210 | 8  | 29.29 |
| 27/01/2020<br>22:50 | 42.8 | 41   | 93.3  | 210 | 9  | 29.26 |
| 27/01/2020<br>23:20 | 42.8 | 39.2 | 86.99 | 200 | 9  | 29.26 |
| 27/01/2020<br>23:50 | 42.8 | 41   | 93.3  | 210 | 8  | 29.26 |
| 28/01/2020<br>00:20 | 42.8 | 41   | 93.3  | 200 | 9  | 29.23 |

|                     |      |      |       |     |    |       |
|---------------------|------|------|-------|-----|----|-------|
| 28/01/2020<br>00:50 | 42.8 | 41   | 93.3  | 220 | 12 | 29.23 |
| 28/01/2020<br>01:20 | 41   | 39.2 | 93.24 | 220 | 9  | 29.21 |
| 28/01/2020<br>01:50 | 41   | 39.2 | 93.24 | 230 | 10 | 29.21 |
| 28/01/2020<br>02:20 | 41   | 39.2 | 93.24 | 230 | 9  | 29.23 |
| 28/01/2020<br>02:50 | 41   | 39.2 | 93.24 | 250 | 12 | 29.23 |
| 28/01/2020<br>03:20 | 41   | 37.4 | 86.89 | 280 | 13 | 29.23 |
| 28/01/2020<br>03:50 | 39.2 | 37.4 | 93.19 | 270 | 13 | 29.23 |
| 28/01/2020<br>04:20 | 37.4 | 35.6 | 93.14 | 270 | 20 | 29.26 |
| 28/01/2020<br>04:50 | 37.4 | 35.6 | 93.14 | 260 | 15 | 29.26 |
| 28/01/2020<br>05:20 | 37.4 | 35.6 | 93.14 | 250 | 14 | 29.26 |
| 28/01/2020<br>05:50 | 37.4 | 35.6 | 93.14 | 250 | 14 | 29.29 |
| 28/01/2020<br>06:20 | 37.4 | 33.8 | 86.69 | 260 | 16 | 29.29 |
| 28/01/2020<br>06:50 | 37.4 | 33.8 | 86.69 | 260 | 14 | 29.32 |
| 28/01/2020<br>07:20 | 37.4 | 33.8 | 86.69 | 270 | 16 | 29.32 |
| 28/01/2020<br>07:50 | 37.4 | 33.8 | 86.69 | 270 | 16 | 29.35 |
| 28/01/2020<br>08:20 | 37.4 | 33.8 | 86.69 | 260 | 14 | 29.38 |
| 28/01/2020<br>08:50 | 37.4 | 33.8 | 86.69 | 260 | 15 | 29.38 |
| 28/01/2020<br>09:20 | 39.2 | 33.8 | 80.79 | 270 | 18 | 29.41 |
| 28/01/2020<br>09:50 | 39.2 | 33.8 | 80.79 | 270 | 18 | 29.41 |
| 28/01/2020<br>10:20 | 39.2 | 33.8 | 80.79 | 260 | 14 | 29.44 |
| 28/01/2020<br>10:50 | 41   | 33.8 | 75.33 | 260 | 16 | 29.44 |
| 28/01/2020<br>11:20 | 42.8 | 33.8 | 70.28 | 260 | 16 | 29.44 |
| 28/01/2020<br>11:50 | 42.8 | 35.6 | 75.5  | 250 | 15 | 29.44 |
| 28/01/2020<br>12:20 | 44.6 | 35.6 | 70.48 | 250 | 16 | 29.44 |

|                     |      |      |       |     |    |       |
|---------------------|------|------|-------|-----|----|-------|
| 28/01/2020<br>12:50 | 44.6 | 35.6 | 70.48 | 250 | 17 | 29.44 |
| 28/01/2020<br>13:20 | 44.6 | 35.6 | 70.48 | 250 | 17 | 29.44 |
| 28/01/2020<br>13:50 | 44.6 | 33.8 | 65.61 | 250 | 16 | 29.44 |
| 28/01/2020<br>14:20 | 46.4 | 33.8 | 61.28 | 260 | 16 | 29.44 |
| 28/01/2020<br>14:50 | 44.6 | 33.8 | 65.61 | 260 | 15 | 29.44 |
| 28/01/2020<br>15:20 | 42.8 | 33.8 | 70.28 | 240 | 13 | 29.44 |
| 28/01/2020<br>15:50 | 42.8 | 33.8 | 70.28 | 250 | 14 | 29.44 |
| 28/01/2020<br>16:20 | 42.8 | 33.8 | 70.28 | 240 | 12 | 29.47 |
| 28/01/2020<br>16:50 | 41   | 33.8 | 75.33 | 250 | 12 | 29.47 |
| 28/01/2020<br>17:20 | 41   | 33.8 | 75.33 | 250 | 12 | 29.5  |
| 28/01/2020<br>17:50 | 41   | 35.6 | 80.93 | 260 | 12 | 29.5  |
| 28/01/2020<br>18:20 | 39.2 | 35.6 | 86.79 | 250 | 12 | 29.53 |
| 28/01/2020<br>18:50 | 39.2 | 35.6 | 86.79 | 250 | 11 | 29.53 |
| 28/01/2020<br>19:20 | 39.2 | 33.8 | 80.79 | 260 | 11 | 29.53 |
| 28/01/2020<br>19:50 | 39.2 | 33.8 | 80.79 | 270 | 8  | 29.56 |
| 28/01/2020<br>20:20 | 39.2 | 33.8 | 80.79 | 260 | 10 | 29.56 |
| 28/01/2020<br>20:50 | 39.2 | 33.8 | 80.79 | 260 | 10 | 29.56 |
| 28/01/2020<br>21:20 | 39.2 | 32   | 75.16 | 250 | 10 | 29.56 |
| 28/01/2020<br>21:50 | 39.2 | 32   | 75.16 | 250 | 11 | 29.59 |
| 28/01/2020<br>22:20 | 39.2 | 32   | 75.16 | 250 | 9  | 29.59 |
| 28/01/2020<br>22:50 | 39.2 | 32   | 75.16 | 250 | 12 | 29.62 |
| 28/01/2020<br>23:20 | 39.2 | 33.8 | 80.79 | 250 | 10 | 29.62 |
| 28/01/2020<br>23:50 | 37.4 | 33.8 | 86.69 | 240 | 8  | 29.62 |
| 29/01/2020<br>00:20 | 37.4 | 32   | 80.65 | 240 | 9  | 29.65 |



|                     |      |      |       |     |    |       |
|---------------------|------|------|-------|-----|----|-------|
| 29/01/2020<br>00:50 | 37.4 | 33.8 | 86.69 | 230 | 9  | 29.65 |
| 29/01/2020<br>01:20 | 37.4 | 32   | 80.65 | 250 | 10 | 29.65 |
| 29/01/2020<br>01:50 | 39.2 | 33.8 | 80.79 | 260 | 10 | 29.65 |
| 29/01/2020<br>02:20 | 39.2 | 33.8 | 80.79 | 250 | 10 | 29.68 |
| 29/01/2020<br>02:50 | 39.2 | 33.8 | 80.79 | 250 | 10 | 29.68 |
| 29/01/2020<br>03:20 | 37.4 | 33.8 | 86.69 | 260 | 8  | 29.68 |
| 29/01/2020<br>03:50 | 39.2 | 33.8 | 80.79 | 260 | 10 | 29.68 |
| 29/01/2020<br>04:20 | 39.2 | 33.8 | 80.79 | 260 | 14 | 29.71 |
| 29/01/2020<br>04:50 | 39.2 | 33.8 | 80.79 | 260 | 12 | 29.71 |
| 29/01/2020<br>05:20 | 39.2 | 33.8 | 80.79 | 250 | 12 | 29.71 |
| 29/01/2020<br>05:50 | 39.2 | 33.8 | 80.79 | 240 | 12 | 29.74 |
| 29/01/2020<br>06:20 | 39.2 | 33.8 | 80.79 | 240 | 11 | 29.74 |
| 29/01/2020<br>06:50 | 39.2 | 33.8 | 80.79 | 240 | 9  | 29.74 |
| 29/01/2020<br>07:20 | 37.4 | 33.8 | 86.69 | 240 | 9  | 29.77 |
| 29/01/2020<br>07:50 | 37.4 | 33.8 | 86.69 | 240 | 9  | 29.77 |
| 29/01/2020<br>08:20 | 37.4 | 33.8 | 86.69 | 240 | 7  | 29.8  |
| 29/01/2020<br>08:50 | 39.2 | 33.8 | 80.79 | 240 | 8  | 29.8  |
| 29/01/2020<br>09:20 | 41   | 35.6 | 80.93 | 250 | 12 | 29.8  |
| 29/01/2020<br>09:50 | 41   | 35.6 | 80.93 | 240 | 12 | 29.83 |
| 29/01/2020<br>10:20 | 42.8 | 35.6 | 75.5  | 240 | 12 | 29.83 |
| 29/01/2020<br>10:50 | 44.6 | 35.6 | 70.48 | 250 | 13 | 29.85 |
| 29/01/2020<br>11:20 | 46.4 | 35.6 | 65.83 | 250 | 14 | 29.85 |
| 29/01/2020<br>11:50 | 46.4 | 37.4 | 70.68 | 260 | 14 | 29.85 |
| 29/01/2020<br>12:20 | 48.2 | 37.4 | 66.05 | 260 | 16 | 29.85 |

|                     |      |      |       |     |    |       |
|---------------------|------|------|-------|-----|----|-------|
| 29/01/2020<br>12:50 | 48.2 | 37.4 | 66.05 | 270 | 14 | 29.85 |
| 29/01/2020<br>13:20 | 48.2 | 37.4 | 66.05 | 260 | 17 | 29.83 |
| 29/01/2020<br>13:50 | 48.2 | 37.4 | 66.05 | 250 | 15 | 29.83 |
| 29/01/2020<br>14:20 | 48.2 | 37.4 | 66.05 | 260 | 14 | 29.85 |
| 29/01/2020<br>14:50 | 48.2 | 37.4 | 66.05 | 250 | 16 | 29.85 |
| 29/01/2020<br>15:20 | 48.2 | 37.4 | 66.05 | 250 | 11 | 29.85 |
| 29/01/2020<br>15:50 | 48.2 | 37.4 | 66.05 | 240 | 10 | 29.85 |
| 29/01/2020<br>16:20 | 48.2 | 39.2 | 70.88 | 230 | 11 | 29.85 |
| 29/01/2020<br>16:50 | 46.4 | 37.4 | 70.68 | 220 | 12 | 29.85 |
| 29/01/2020<br>17:20 | 46.4 | 37.4 | 70.68 | 220 | 10 | 29.85 |
| 29/01/2020<br>17:50 | 44.6 | 37.4 | 75.68 | 210 | 9  | 29.85 |
| 29/01/2020<br>18:20 | 44.6 | 37.4 | 75.68 | 220 | 10 | 29.85 |
| 29/01/2020<br>18:50 | 44.6 | 39.2 | 81.2  | 220 | 10 | 29.85 |
| 29/01/2020<br>19:20 | 44.6 | 39.2 | 81.2  | 220 | 13 | 29.85 |
| 29/01/2020<br>19:50 | 44.6 | 41   | 87.09 | 210 | 10 | 29.85 |
| 29/01/2020<br>20:20 | 44.6 | 41   | 87.09 | 220 | 9  | 29.85 |
| 29/01/2020<br>20:50 | 46.4 | 42.8 | 87.19 | 220 | 10 | 29.85 |
| 29/01/2020<br>21:20 | 44.6 | 41   | 87.09 | 210 | 10 | 29.85 |
| 29/01/2020<br>21:50 | 44.6 | 42.8 | 93.35 | 210 | 10 | 29.85 |
| 29/01/2020<br>22:20 | 46.4 | 42.8 | 87.19 | 220 | 10 | 29.85 |
| 29/01/2020<br>22:50 | 46.4 | 42.8 | 87.19 | 220 | 11 | 29.85 |
| 29/01/2020<br>23:20 | 46.4 | 42.8 | 87.19 | 230 | 12 | 29.85 |
| 29/01/2020<br>23:50 | 46.4 | 44.6 | 93.4  | 220 | 10 | 29.83 |
| 30/01/2020<br>00:20 | 48.2 | 44.6 | 87.28 | 220 | 12 | 29.83 |

|                     |      |      |       |     |    |       |
|---------------------|------|------|-------|-----|----|-------|
| 30/01/2020<br>00:50 | 46.4 | 42.8 | 87.19 | 230 | 11 | 29.83 |
| 30/01/2020<br>01:20 | 46.4 | 42.8 | 87.19 | 230 | 9  | 29.83 |
| 30/01/2020<br>01:50 | 46.4 | 44.6 | 93.4  | 230 | 8  | 29.83 |
| 30/01/2020<br>02:20 | 46.4 | 44.6 | 93.4  | 210 | 5  | 29.83 |
| 30/01/2020<br>02:50 | 46.4 | 44.6 | 93.4  | 210 | 4  | 29.8  |
| 30/01/2020<br>03:20 | 46.4 | 44.6 | 93.4  | 200 | 4  | 29.8  |
| 30/01/2020<br>03:50 | 46.4 | 44.6 | 93.4  | 210 | 6  | 29.77 |
| 30/01/2020<br>04:20 | 46.4 | 44.6 | 93.4  | 210 | 6  | 29.77 |
| 30/01/2020<br>04:50 | 46.4 | 44.6 | 93.4  | 210 | 6  | 29.74 |
| 30/01/2020<br>05:20 | 46.4 | 44.6 | 93.4  | 190 | 4  | 29.74 |
| 30/01/2020<br>05:50 | 46.4 | 44.6 | 93.4  | 200 | 7  | 29.71 |
| 30/01/2020<br>06:20 | 46.4 | 46.4 | 100   | 200 | 8  | 29.71 |
| 30/01/2020<br>06:50 | 46.4 | 46.4 | 100   | 190 | 9  | 29.71 |
| 30/01/2020<br>07:20 | 46.4 | 46.4 | 100   | 200 | 8  | 29.71 |
| 30/01/2020<br>07:50 | 48.2 | 46.4 | 93.45 | 190 | 8  | 29.68 |
| 30/01/2020<br>08:20 | 48.2 | 46.4 | 93.45 | 190 | 9  | 29.68 |
| 30/01/2020<br>08:50 | 48.2 | 46.4 | 93.45 | 170 | 7  | 29.68 |
| 30/01/2020<br>09:20 | 48.2 | 46.4 | 93.45 | 160 | 7  | 29.65 |
| 30/01/2020<br>09:50 | 48.2 | 46.4 | 93.45 | 180 | 6  | 29.65 |
| 30/01/2020<br>10:20 | 48.2 | 48.2 | 100   | 180 | 9  | 29.62 |
| 30/01/2020<br>10:50 | 48.2 | 48.2 | 100   | 190 | 12 | 29.59 |
| 30/01/2020<br>11:20 | 50   | 48.2 | 93.5  | 200 | 12 | 29.59 |
| 30/01/2020<br>11:50 | 50   | 48.2 | 93.5  | 220 | 7  | 29.59 |
| 30/01/2020<br>12:20 | 50   | 48.2 | 93.5  | 220 | 7  | 29.59 |

|                     |      |      |       |     |    |       |
|---------------------|------|------|-------|-----|----|-------|
| 30/01/2020<br>12:50 | 50   | 50   | 100   | 190 | 7  | 29.56 |
| 30/01/2020<br>13:20 | 51.8 | 50   | 93.55 | 210 | 7  | 29.53 |
| 30/01/2020<br>13:50 | 51.8 | 51.8 | 100   | 220 | 10 | 29.53 |
| 30/01/2020<br>14:20 | 53.6 | 51.8 | 93.6  | 230 | 10 | 29.53 |
| 30/01/2020<br>14:50 | 55.4 | 53.6 | 93.65 | 240 | 12 | 29.53 |
| 30/01/2020<br>15:20 | 53.6 | 53.6 | 100   | 240 | 12 | 29.53 |
| 30/01/2020<br>15:50 | 53.6 | 53.6 | 100   | 240 | 11 | 29.53 |
| 30/01/2020<br>16:20 | 53.6 | 53.6 | 100   | 240 | 12 | 29.53 |
| 30/01/2020<br>16:50 | 55.4 | 53.6 | 93.65 | 240 | 15 | 29.56 |
| 30/01/2020<br>17:20 | 55.4 | 53.6 | 93.65 | 240 | 13 | 29.56 |
| 30/01/2020<br>17:50 | 55.4 | 53.6 | 93.65 | 250 | 14 | 29.56 |
| 30/01/2020<br>18:20 | 55.4 | 53.6 | 93.65 | 240 | 14 | 29.56 |
| 30/01/2020<br>18:50 | 55.4 | 53.6 | 93.65 | 240 | 14 | 29.56 |
| 30/01/2020<br>19:20 | 55.4 | 51.8 | 87.65 | 250 | 16 | 29.56 |
| 30/01/2020<br>19:50 | 55.4 | 51.8 | 87.65 | 240 | 15 | 29.59 |
| 30/01/2020<br>20:20 | 53.6 | 51.8 | 93.6  | 250 | 14 | 29.59 |
| 30/01/2020<br>20:50 | 53.6 | 50   | 87.56 | 240 | 13 | 29.62 |
| 30/01/2020<br>21:20 | 53.6 | 50   | 87.56 | 260 | 13 | 29.62 |
| 30/01/2020<br>21:50 | 53.6 | 50   | 87.56 | 250 | 12 | 29.65 |
| 30/01/2020<br>22:20 | 53.6 | 50   | 87.56 | 260 | 17 | 29.65 |
| 30/01/2020<br>22:50 | 51.8 | 48.2 | 87.47 | 280 | 13 | 29.68 |
| 30/01/2020<br>23:20 | 50   | 46.4 | 87.37 | 260 | 17 | 29.68 |
| 30/01/2020<br>23:50 | 50   | 46.4 | 87.37 | 270 | 15 | 29.71 |
| 31/01/2020<br>00:20 | 50   | 46.4 | 87.37 | 250 | 13 | 29.71 |

|                     |      |      |       |     |    |       |
|---------------------|------|------|-------|-----|----|-------|
| 31/01/2020<br>00:50 | 50   | 46.4 | 87.37 | 250 | 13 | 29.71 |
| 31/01/2020<br>01:20 | 50   | 46.4 | 87.37 | 250 | 9  | 29.71 |
| 31/01/2020<br>01:50 | 50   | 46.4 | 87.37 | 250 | 11 | 29.74 |
| 31/01/2020<br>02:20 | 50   | 46.4 | 87.37 | 230 | 9  | 29.74 |
| 31/01/2020<br>02:50 | 48.2 | 46.4 | 93.45 | 240 | 10 | 29.74 |
| 31/01/2020<br>03:20 | 48.2 | 46.4 | 93.45 | 230 | 10 | 29.74 |
| 31/01/2020<br>03:50 | 48.2 | 46.4 | 93.45 | 230 | 10 | 29.74 |
| 31/01/2020<br>04:20 | 48.2 | 46.4 | 93.45 | 240 | 10 | 29.74 |
| 31/01/2020<br>04:50 | 48.2 | 46.4 | 93.45 | 240 | 12 | 29.77 |
| 31/01/2020<br>05:20 | 48.2 | 46.4 | 93.45 | 240 | 11 | 29.77 |
| 31/01/2020<br>05:50 | 48.2 | 46.4 | 93.45 | 240 | 9  | 29.77 |
| 31/01/2020<br>06:20 | 48.2 | 46.4 | 93.45 | 220 | 9  | 29.74 |
| 31/01/2020<br>06:50 | 50   | 48.2 | 93.5  | 240 | 11 | 29.77 |
| 31/01/2020<br>07:20 | 50   | 48.2 | 93.5  | 230 | 11 | 29.77 |
| 31/01/2020<br>07:50 | 50   | 48.2 | 93.5  | 220 | 10 | 29.77 |
| 31/01/2020<br>08:20 | 48.2 | 48.2 | 100   | 220 | 12 | 29.77 |
| 31/01/2020<br>08:50 | 50   | 48.2 | 93.5  | 220 | 12 | 29.77 |
| 31/01/2020<br>09:20 | 50   | 48.2 | 93.5  | 230 | 13 | 29.77 |
| 31/01/2020<br>09:50 | 51.8 | 50   | 93.55 | 220 | 13 | 29.77 |
| 31/01/2020<br>10:20 | 51.8 | 50   | 93.55 | 230 | 12 | 29.77 |
| 31/01/2020<br>10:50 | 53.6 | 50   | 87.56 | 240 | 15 | 29.74 |
| 31/01/2020<br>11:20 | 53.6 | 50   | 87.56 | 230 | 17 | 29.74 |
| 31/01/2020<br>11:50 | 53.6 | 50   | 87.56 | 240 | 18 | 29.77 |
| 31/01/2020<br>12:20 | 53.6 | 48.2 | 81.87 | 230 | 18 | 29.74 |

|                     |      |      |       |     |    |       |
|---------------------|------|------|-------|-----|----|-------|
| 31/01/2020<br>12:50 | 53.6 | 48.2 | 81.87 | 220 | 17 | 29.74 |
| 31/01/2020<br>13:20 | 51.8 | 50   | 93.55 | 220 | 16 | 29.71 |
| 31/01/2020<br>13:50 | 51.8 | 50   | 93.55 | 230 | 11 | 29.71 |
| 31/01/2020<br>14:20 | 53.6 | 50   | 87.56 | 220 | 15 | 29.71 |
| 31/01/2020<br>14:50 | 53.6 | 50   | 87.56 | 230 | 16 | 29.68 |
| 31/01/2020<br>15:20 | 53.6 | 50   | 87.56 | 230 | 15 | 29.68 |
| 31/01/2020<br>15:50 | 53.6 | 50   | 87.56 | 230 | 15 | 29.68 |
| 31/01/2020<br>16:20 | 53.6 | 50   | 87.56 | 220 | 13 | 29.68 |
| 31/01/2020<br>16:50 | 51.8 | 50   | 93.55 | 210 | 13 | 29.68 |
| 31/01/2020<br>17:20 | 51.8 | 50   | 93.55 | 220 | 13 | 29.65 |
| 31/01/2020<br>17:50 | 51.8 | 50   | 93.55 | 220 | 13 | 29.65 |
| 31/01/2020<br>18:20 | 51.8 | 50   | 93.55 | 210 | 14 | 29.65 |
| 31/01/2020<br>18:50 | 51.8 | 51.8 | 100   | 220 | 13 | 29.65 |
| 31/01/2020<br>19:20 | 51.8 | 51.8 | 100   | 220 | 13 | 29.65 |
| 31/01/2020<br>19:50 | 51.8 | 51.8 | 100   | 220 | 14 | 29.65 |
| 31/01/2020<br>20:20 | 53.6 | 51.8 | 93.6  | 230 | 14 | 29.62 |
| 31/01/2020<br>20:50 | 53.6 | 51.8 | 93.6  | 230 | 14 | 29.62 |
| 31/01/2020<br>21:20 | 53.6 | 51.8 | 93.6  | 220 | 13 | 29.62 |
| 31/01/2020<br>21:50 | 53.6 | 51.8 | 93.6  | 230 | 12 | 29.65 |
| 31/01/2020<br>22:20 | 51.8 | 51.8 | 100   | 210 | 12 | 29.62 |
| 31/01/2020<br>22:50 | 53.6 | 51.8 | 93.6  | 210 | 10 | 29.59 |
| 31/01/2020<br>23:20 | 51.8 | 51.8 | 100   | 220 | 9  | 29.62 |
| 31/01/2020<br>23:50 | 51.8 | 51.8 | 100   | 230 | 9  | 29.62 |
| 01/02/2020<br>00:20 | 51.8 | 50   | 93.55 | 220 | 11 | 29.59 |

|                     |      |      |       |     |    |       |
|---------------------|------|------|-------|-----|----|-------|
| 01/02/2020<br>00:50 | 51.8 | 50   | 93.55 | 220 | 9  | 29.59 |
| 01/02/2020<br>01:20 | 51.8 | 50   | 93.55 | 230 | 8  | 29.59 |
| 01/02/2020<br>01:50 | 51.8 | 50   | 93.55 | 220 | 9  | 29.59 |
| 01/02/2020<br>02:20 | 51.8 | 50   | 93.55 | 210 | 10 | 29.59 |
| 01/02/2020<br>02:50 | 51.8 | 50   | 93.55 | 220 | 10 | 29.59 |
| 01/02/2020<br>03:20 | 51.8 | 50   | 93.55 | 230 | 11 | 29.59 |
| 01/02/2020<br>03:50 | 51.8 | 48.2 | 87.47 | 240 | 12 | 29.56 |
| 01/02/2020<br>04:20 | 51.8 | 48.2 | 87.47 | 230 | 12 | 29.56 |
| 01/02/2020<br>04:50 | 50   | 48.2 | 93.5  | 230 | 13 | 29.56 |
| 01/02/2020<br>05:20 | 50   | 48.2 | 93.5  | 240 | 10 | 29.56 |
| 01/02/2020<br>05:50 | 50   | 48.2 | 93.5  | 230 | 11 | 29.56 |
| 01/02/2020<br>06:20 | 50   | 48.2 | 93.5  | 230 | 12 | 29.56 |
| 01/02/2020<br>06:50 | 50   | 48.2 | 93.5  | 230 | 12 | 29.56 |
| 01/02/2020<br>07:20 | 50   | 46.4 | 87.37 | 240 | 15 | 29.59 |
| 01/02/2020<br>07:50 | 50   | 46.4 | 87.37 | 240 | 14 | 29.59 |
| 01/02/2020<br>08:20 | 50   | 46.4 | 87.37 | 240 | 14 | 29.59 |
| 01/02/2020<br>08:50 | 50   | 44.6 | 81.61 | 240 | 13 | 29.59 |
| 01/02/2020<br>09:20 | 50   | 44.6 | 81.61 | 240 | 14 | 29.62 |
| 01/02/2020<br>09:50 | 50   | 42.8 | 76.18 | 240 | 16 | 29.62 |
| 01/02/2020<br>10:20 | 50   | 42.8 | 76.18 | 250 | 15 | 29.62 |
| 01/02/2020<br>10:50 | 51.8 | 41   | 66.48 | 260 | 20 | 29.62 |
| 01/02/2020<br>11:20 | 51.8 | 41   | 66.48 | 260 | 20 | 29.65 |
| 01/02/2020<br>11:50 | 51.8 | 39.2 | 61.99 | 260 | 21 | 29.65 |
| 01/02/2020<br>12:20 | 51.8 | 41   | 66.48 | 260 | 22 | 29.65 |

|                     |      |      |       |     |    |       |
|---------------------|------|------|-------|-----|----|-------|
| 01/02/2020<br>12:50 | 51.8 | 39.2 | 61.99 | 260 | 17 | 29.65 |
| 01/02/2020<br>13:20 | 53.6 | 39.2 | 58.02 | 270 | 18 | 29.65 |
| 01/02/2020<br>13:50 | 53.6 | 35.6 | 50.36 | 260 | 25 | 29.68 |
| 01/02/2020<br>14:20 | 51.8 | 37.4 | 57.77 | 280 | 24 | 29.68 |
| 01/02/2020<br>14:50 | 51.8 | 35.6 | 53.81 | 270 | 20 | 29.68 |
| 01/02/2020<br>15:20 | 51.8 | 35.6 | 53.81 | 270 | 23 | 29.71 |
| 01/02/2020<br>15:50 | 50   | 35.6 | 57.52 | 260 | 20 | 29.71 |
| 01/02/2020<br>16:20 | 50   | 35.6 | 57.52 | 260 | 19 | 29.71 |
| 01/02/2020<br>16:50 | 50   | 35.6 | 57.52 | 260 | 18 | 29.74 |
| 01/02/2020<br>17:20 | 50   | 37.4 | 61.76 | 260 | 18 | 29.74 |
| 01/02/2020<br>17:50 | 50   | 37.4 | 61.76 | 260 | 20 | 29.77 |
| 01/02/2020<br>18:20 | 48.2 | 37.4 | 66.05 | 260 | 20 | 29.77 |
| 01/02/2020<br>18:50 | 48.2 | 37.4 | 66.05 | 250 | 16 | 29.77 |
| 01/02/2020<br>19:20 | 48.2 | 37.4 | 66.05 | 250 | 12 | 29.8  |
| 01/02/2020<br>19:50 | 48.2 | 37.4 | 66.05 | 240 | 11 | 29.8  |
| 01/02/2020<br>20:20 | 46.4 | 37.4 | 70.68 | 240 | 13 | 29.83 |
| 01/02/2020<br>20:50 | 46.4 | 37.4 | 70.68 | 240 | 11 | 29.83 |
| 01/02/2020<br>21:20 | 46.4 | 37.4 | 70.68 | 240 | 12 | 29.83 |
| 01/02/2020<br>21:50 | 46.4 | 37.4 | 70.68 | 240 | 11 | 29.83 |
| 01/02/2020<br>22:20 | 46.4 | 39.2 | 75.84 | 240 | 10 | 29.83 |
| 01/02/2020<br>22:50 | 44.6 | 39.2 | 81.2  | 230 | 9  | 29.85 |
| 01/02/2020<br>23:20 | 44.6 | 39.2 | 81.2  | 230 | 10 | 29.83 |
| 01/02/2020<br>23:50 | 44.6 | 39.2 | 81.2  | 230 | 8  | 29.83 |
| 02/02/2020<br>00:20 | 44.6 | 39.2 | 81.2  | 210 | 7  | 29.83 |



|                     |      |      |       |     |    |       |
|---------------------|------|------|-------|-----|----|-------|
| 02/02/2020<br>00:50 | 44.6 | 39.2 | 81.2  | 220 | 7  | 29.83 |
| 02/02/2020<br>01:20 | 44.6 | 39.2 | 81.2  | 210 | 7  | 29.8  |
| 02/02/2020<br>02:20 | 44.6 | 41   | 87.09 | 170 | 3  | 29.8  |
| 02/02/2020<br>02:50 | 44.6 | 42.8 | 93.35 | 150 | 4  | 29.77 |
| 02/02/2020<br>03:20 | 44.6 | 42.8 | 93.35 | 140 | 5  | 29.74 |
| 02/02/2020<br>03:50 | 42.8 | 42.8 | 100   | 110 | 6  | 29.71 |
| 02/02/2020<br>04:20 | 44.6 | 42.8 | 93.35 | 120 | 8  | 29.68 |
| 02/02/2020<br>04:50 | 44.6 | 44.6 | 100   | 130 | 7  | 29.68 |
| 02/02/2020<br>05:20 | 44.6 | 44.6 | 100   | 110 | 9  | 29.65 |
| 02/02/2020<br>05:50 | 44.6 | 44.6 | 100   | 120 | 6  | 29.62 |
| 02/02/2020<br>06:20 | 46.4 | 44.6 | 93.4  | M   | 5  | 29.62 |
| 02/02/2020<br>06:50 | 48.2 | 46.4 | 93.45 | 220 | 6  | 29.59 |
| 02/02/2020<br>07:20 | 50   | 50   | 100   | 230 | 7  | 29.62 |
| 02/02/2020<br>07:50 | 51.8 | 51.8 | 100   | 230 | 8  | 29.62 |
| 02/02/2020<br>08:20 | 51.8 | 51.8 | 100   | 240 | 12 | 29.62 |
| 02/02/2020<br>08:50 | 53.6 | 53.6 | 100   | 260 | 15 | 29.65 |
| 02/02/2020<br>09:20 | 53.6 | 51.8 | 93.6  | 260 | 17 | 29.65 |
| 02/02/2020<br>09:50 | 53.6 | 50   | 87.56 | 260 | 19 | 29.68 |
| 02/02/2020<br>10:20 | 53.6 | 50   | 87.56 | 260 | 18 | 29.68 |
| 02/02/2020<br>10:50 | 53.6 | 48.2 | 81.87 | 260 | 20 | 29.71 |
| 02/02/2020<br>11:20 | 53.6 | 48.2 | 81.87 | 260 | 17 | 29.74 |
| 02/02/2020<br>11:50 | 55.4 | 48.2 | 76.66 | 260 | 20 | 29.74 |
| 02/02/2020<br>12:20 | 55.4 | 46.4 | 71.64 | 250 | 20 | 29.74 |
| 02/02/2020<br>12:50 | 55.4 | 46.4 | 71.64 | 260 | 21 | 29.74 |

|                     |      |      |       |     |    |       |
|---------------------|------|------|-------|-----|----|-------|
| 02/02/2020<br>13:20 | 55.4 | 46.4 | 71.64 | 260 | 19 | 29.77 |
| 02/02/2020<br>13:50 | 55.4 | 44.6 | 66.91 | 270 | 19 | 29.77 |
| 02/02/2020<br>14:20 | 53.6 | 44.6 | 71.45 | 270 | 17 | 29.77 |
| 02/02/2020<br>14:50 | 55.4 | 44.6 | 66.91 | 260 | 12 | 29.8  |
| 02/02/2020<br>15:20 | 55.4 | 44.6 | 66.91 | 250 | 11 | 29.8  |
| 02/02/2020<br>15:50 | 55.4 | 44.6 | 66.91 | 240 | 14 | 29.8  |
| 02/02/2020<br>16:20 | 53.6 | 46.4 | 76.5  | 240 | 13 | 29.8  |
| 02/02/2020<br>16:50 | 53.6 | 46.4 | 76.5  | 240 | 12 | 29.8  |
| 02/02/2020<br>17:20 | 53.6 | 46.4 | 76.5  | 230 | 13 | 29.8  |
| 02/02/2020<br>17:50 | 53.6 | 48.2 | 81.87 | 230 | 13 | 29.8  |
| 02/02/2020<br>18:20 | 53.6 | 48.2 | 81.87 | 220 | 12 | 29.8  |
| 02/02/2020<br>18:50 | 53.6 | 48.2 | 81.87 | 230 | 12 | 29.8  |
| 02/02/2020<br>19:20 | 53.6 | 48.2 | 81.87 | 230 | 13 | 29.8  |
| 02/02/2020<br>19:50 | 53.6 | 48.2 | 81.87 | 230 | 14 | 29.83 |
| 02/02/2020<br>20:20 | 51.8 | 48.2 | 87.47 | 230 | 12 | 29.8  |
| 02/02/2020<br>20:50 | 51.8 | 48.2 | 87.47 | 230 | 12 | 29.8  |
| 02/02/2020<br>21:20 | 51.8 | 48.2 | 87.47 | 230 | 13 | 29.83 |
| 02/02/2020<br>21:50 | 51.8 | 48.2 | 87.47 | 240 | 13 | 29.83 |
| 02/02/2020<br>22:20 | 51.8 | 48.2 | 87.47 | 240 | 13 | 29.83 |
| 02/02/2020<br>22:50 | 51.8 | 46.4 | 81.74 | 230 | 14 | 29.83 |
| 02/02/2020<br>23:20 | 51.8 | 46.4 | 81.74 | 230 | 13 | 29.83 |
| 02/02/2020<br>23:50 | 51.8 | 46.4 | 81.74 | 230 | 15 | 29.83 |
| 03/02/2020<br>00:20 | 50   | 46.4 | 87.37 | 240 | 14 | 29.83 |
| 03/02/2020<br>00:50 | 50   | 44.6 | 81.61 | 240 | 14 | 29.85 |

|                     |      |      |       |     |    |       |
|---------------------|------|------|-------|-----|----|-------|
| 03/02/2020<br>01:20 | 50   | 46.4 | 87.37 | 240 | 16 | 29.83 |
| 03/02/2020<br>01:50 | 50   | 44.6 | 81.61 | 240 | 15 | 29.83 |
| 03/02/2020<br>02:20 | 50   | 44.6 | 81.61 | 240 | 16 | 29.85 |
| 03/02/2020<br>02:50 | 50   | 44.6 | 81.61 | 250 | 17 | 29.85 |
| 03/02/2020<br>03:20 | 50   | 44.6 | 81.61 | 250 | 14 | 29.85 |
| 03/02/2020<br>03:50 | 50   | 44.6 | 81.61 | 250 | 14 | 29.85 |
| 03/02/2020<br>04:20 | 50   | 44.6 | 81.61 | 250 | 18 | 29.85 |
| 03/02/2020<br>04:50 | 48.2 | 46.4 | 93.45 | 260 | 13 | 29.88 |
| 03/02/2020<br>05:20 | 48.2 | 44.6 | 87.28 | 260 | 17 | 29.88 |
| 03/02/2020<br>05:50 | 48.2 | 42.8 | 81.47 | 250 | 16 | 29.88 |
| 03/02/2020<br>06:20 | 48.2 | 42.8 | 81.47 | 260 | 14 | 29.88 |
| 03/02/2020<br>06:50 | 48.2 | 42.8 | 81.47 | 260 | 14 | 29.91 |
| 03/02/2020<br>07:20 | 48.2 | 42.8 | 81.47 | 250 | 16 | 29.91 |
| 03/02/2020<br>07:50 | 48.2 | 42.8 | 81.47 | 260 | 14 | 29.91 |
| 03/02/2020<br>08:20 | 48.2 | 42.8 | 81.47 | 250 | 12 | 29.94 |
| 03/02/2020<br>08:50 | 48.2 | 42.8 | 81.47 | 240 | 12 | 29.94 |
| 03/02/2020<br>09:20 | 50   | 42.8 | 76.18 | 240 | 13 | 29.94 |
| 03/02/2020<br>09:50 | 50   | 42.8 | 76.18 | 250 | 14 | 29.97 |
| 03/02/2020<br>10:20 | 50   | 42.8 | 76.18 | 250 | 15 | 29.97 |
| 03/02/2020<br>10:50 | 50   | 42.8 | 76.18 | 250 | 16 | 29.97 |
| 03/02/2020<br>11:20 | 51.8 | 42.8 | 71.26 | 250 | 14 | 29.97 |
| 03/02/2020<br>11:50 | 51.8 | 42.8 | 71.26 | 250 | 16 | 29.94 |
| 03/02/2020<br>12:20 | 51.8 | 42.8 | 71.26 | 250 | 13 | 29.94 |
| 03/02/2020<br>12:50 | 51.8 | 42.8 | 71.26 | 260 | 18 | 29.94 |

|                     |      |      |       |     |    |       |
|---------------------|------|------|-------|-----|----|-------|
| 03/02/2020<br>13:20 | 51.8 | 44.6 | 76.34 | 250 | 13 | 29.91 |
| 03/02/2020<br>13:50 | 51.8 | 44.6 | 76.34 | 260 | 12 | 29.91 |
| 03/02/2020<br>14:20 | 51.8 | 42.8 | 71.26 | 260 | 13 | 29.91 |
| 03/02/2020<br>14:50 | 51.8 | 41   | 66.48 | 250 | 13 | 29.88 |
| 03/02/2020<br>15:20 | 51.8 | 41   | 66.48 | 270 | 14 | 29.88 |
| 03/02/2020<br>15:50 | 50   | 41   | 71.07 | 270 | 11 | 29.88 |
| 03/02/2020<br>16:20 | 50   | 41   | 71.07 | 270 | 13 | 29.88 |
| 03/02/2020<br>16:50 | 48.2 | 41   | 76.01 | 280 | 9  | 29.88 |
| 03/02/2020<br>17:20 | 48.2 | 41   | 76.01 | 300 | 6  | 29.88 |
| 03/02/2020<br>17:50 | 48.2 | 41   | 76.01 | 290 | 7  | 29.85 |
| 03/02/2020<br>18:20 | 48.2 | 37.4 | 66.05 | 290 | 9  | 29.88 |
| 03/02/2020<br>18:50 | 48.2 | 35.6 | 61.52 | 290 | 8  | 29.88 |
| 03/02/2020<br>19:20 | 46.4 | 35.6 | 65.83 | 300 | 10 | 29.88 |
| 03/02/2020<br>19:50 | 46.4 | 33.8 | 61.28 | 300 | 11 | 29.88 |
| 03/02/2020<br>20:20 | 46.4 | 33.8 | 61.28 | 300 | 11 | 29.88 |
| 03/02/2020<br>20:50 | 44.6 | 33.8 | 65.61 | 290 | 11 | 29.91 |
| 03/02/2020<br>21:20 | 42.8 | 33.8 | 70.28 | 290 | 8  | 29.91 |
| 03/02/2020<br>21:50 | 41   | 33.8 | 75.33 | 290 | 10 | 29.94 |
| 03/02/2020<br>22:20 | 41   | 33.8 | 75.33 | 280 | 12 | 29.94 |
| 03/02/2020<br>22:50 | 41   | 33.8 | 75.33 | 280 | 11 | 29.94 |
| 03/02/2020<br>23:20 | 41   | 33.8 | 75.33 | 270 | 11 | 29.94 |
| 03/02/2020<br>23:50 | 39.2 | 33.8 | 80.79 | 280 | 9  | 29.94 |
| 04/02/2020<br>00:20 | 41   | 33.8 | 75.33 | 270 | 10 | 29.94 |
| 04/02/2020<br>00:50 | 41   | 33.8 | 75.33 | 270 | 12 | 29.97 |

|                     |      |      |       |     |    |       |
|---------------------|------|------|-------|-----|----|-------|
| 04/02/2020<br>01:20 | 39.2 | 33.8 | 80.79 | 270 | 11 | 29.94 |
| 04/02/2020<br>01:50 | 41   | 33.8 | 75.33 | 270 | 13 | 29.94 |
| 04/02/2020<br>02:20 | 41   | 33.8 | 75.33 | 270 | 15 | 29.97 |
| 04/02/2020<br>02:50 | 41   | 33.8 | 75.33 | 260 | 16 | 29.97 |
| 04/02/2020<br>03:20 | 41   | 33.8 | 75.33 | 260 | 16 | 29.97 |
| 04/02/2020<br>03:50 | 41   | 33.8 | 75.33 | 270 | 15 | 29.97 |
| 04/02/2020<br>04:20 | 41   | 33.8 | 75.33 | 280 | 16 | 30    |
| 04/02/2020<br>04:50 | 41   | 35.6 | 80.93 | 280 | 13 | 30    |
| 04/02/2020<br>05:20 | 41   | 35.6 | 80.93 | 280 | 17 | 30    |
| 04/02/2020<br>05:50 | 41   | 35.6 | 80.93 | 270 | 14 | 30    |
| 04/02/2020<br>06:20 | 41   | 35.6 | 80.93 | 270 | 15 | 30.03 |
| 04/02/2020<br>06:50 | 41   | 33.8 | 75.33 | 270 | 13 | 30.03 |
| 04/02/2020<br>07:20 | 41   | 33.8 | 75.33 | 280 | 14 | 30.03 |
| 04/02/2020<br>07:50 | 41   | 33.8 | 75.33 | 280 | 14 | 30.06 |
| 04/02/2020<br>08:20 | 41   | 33.8 | 75.33 | 280 | 12 | 30.09 |
| 04/02/2020<br>08:50 | 42.8 | 33.8 | 70.28 | 280 | 13 | 30.09 |
| 04/02/2020<br>09:20 | 42.8 | 32   | 65.38 | 280 | 16 | 30.09 |
| 04/02/2020<br>09:50 | 44.6 | 33.8 | 65.61 | 280 | 15 | 30.12 |
| 04/02/2020<br>10:20 | 44.6 | 33.8 | 65.61 | 280 | 13 | 30.12 |
| 04/02/2020<br>10:50 | 46.4 | 32   | 57    | 290 | 13 | 30.15 |
| 04/02/2020<br>11:20 | 46.4 | 33.8 | 61.28 | 300 | 13 | 30.15 |
| 04/02/2020<br>11:50 | 46.4 | 33.8 | 61.28 | 300 | 13 | 30.18 |
| 04/02/2020<br>12:20 | 48.2 | 35.6 | 61.52 | 290 | 13 | 30.18 |
| 04/02/2020<br>12:50 | 48.2 | 35.6 | 61.52 | 290 | 12 | 30.21 |

|                     |      |      |       |     |    |       |
|---------------------|------|------|-------|-----|----|-------|
| 04/02/2020<br>13:20 | 48.2 | 35.6 | 61.52 | 300 | 10 | 30.21 |
| 04/02/2020<br>13:50 | 48.2 | 37.4 | 66.05 | 300 | 10 | 30.24 |
| 04/02/2020<br>14:20 | 48.2 | 37.4 | 66.05 | 310 | 9  | 30.24 |
| 04/02/2020<br>14:50 | 50   | 39.2 | 66.27 | 310 | 8  | 30.27 |
| 04/02/2020<br>15:20 | 48.2 | 39.2 | 70.88 | 300 | 10 | 30.3  |
| 04/02/2020<br>15:50 | 48.2 | 39.2 | 70.88 | 300 | 7  | 30.3  |
| 04/02/2020<br>16:20 | 48.2 | 41   | 76.01 | 290 | 7  | 30.33 |
| 04/02/2020<br>16:50 | 48.2 | 41   | 76.01 | 300 | 8  | 30.33 |
| 04/02/2020<br>17:20 | 48.2 | 41   | 76.01 | 310 | 9  | 30.36 |
| 04/02/2020<br>17:50 | 48.2 | 41   | 76.01 | 310 | 7  | 30.36 |
| 04/02/2020<br>18:20 | 48.2 | 41   | 76.01 | 300 | 7  | 30.39 |
| 04/02/2020<br>18:50 | 48.2 | 41   | 76.01 | 310 | 6  | 30.42 |
| 04/02/2020<br>19:20 | 48.2 | 41   | 76.01 | 300 | 8  | 30.42 |
| 04/02/2020<br>19:50 | 46.4 | 41   | 81.34 | 310 | 5  | 30.45 |
| 04/02/2020<br>20:20 | 46.4 | 41   | 81.34 | 290 | 5  | 30.45 |
| 04/02/2020<br>20:50 | 46.4 | 41   | 81.34 | 320 | 5  | 30.47 |
| 04/02/2020<br>21:20 | 46.4 | 41   | 81.34 | 310 | 4  | 30.47 |
| 04/02/2020<br>21:50 | 46.4 | 41   | 81.34 | 310 | 4  | 30.5  |
| 04/02/2020<br>22:20 | 46.4 | 41   | 81.34 | M   | 3  | 30.5  |
| 04/02/2020<br>22:50 | 44.6 | 41   | 87.09 | M   | 3  | 30.53 |
| 04/02/2020<br>23:20 | 42.8 | 39.2 | 86.99 | M   | 2  | 30.53 |
| 04/02/2020<br>23:50 | 42.8 | 39.2 | 86.99 | M   | 1  | 30.53 |
| 05/02/2020<br>00:20 | 41   | 39.2 | 93.24 | 300 | 3  | 30.53 |
| 05/02/2020<br>00:50 | 41   | 39.2 | 93.24 | 290 | 4  | 30.56 |

|                     |      |      |       |     |   |       |
|---------------------|------|------|-------|-----|---|-------|
| 05/02/2020<br>01:20 | 41   | 39.2 | 93.24 | 300 | 4 | 30.56 |
| 05/02/2020<br>01:50 | 41   | 39.2 | 93.24 | 310 | 3 | 30.56 |
| 05/02/2020<br>02:20 | 39.2 | 37.4 | 93.19 | 290 | 1 | 30.56 |
| 05/02/2020<br>02:50 | 35.6 | 33.8 | 93.08 | 280 | 4 | 30.56 |
| 05/02/2020<br>03:20 | 37.4 | 35.6 | 93.14 | 290 | 4 | 30.59 |
| 05/02/2020<br>03:50 | 35.6 | 35.6 | 100   | 300 | 4 | 30.59 |
| 05/02/2020<br>04:20 | 35.6 | 35.6 | 100   | 310 | 3 | 30.59 |
| 05/02/2020<br>04:50 | 37.4 | 37.4 | 100   | 310 | 4 | 30.62 |
| 05/02/2020<br>05:20 | 37.4 | 37.4 | 100   | 310 | 3 | 30.62 |
| 05/02/2020<br>05:50 | 35.6 | 35.6 | 100   | M   | 2 | 30.62 |
| 05/02/2020<br>06:20 | 37.4 | 37.4 | 100   | M   | 3 | 30.62 |
| 05/02/2020<br>06:50 | 37.4 | 37.4 | 100   | 20  | 2 | 30.62 |
| 05/02/2020<br>07:20 | 37.4 | 37.4 | 100   | M   | 2 | 30.62 |
| 05/02/2020<br>07:50 | 35.6 | 35.6 | 100   | M   | 2 | 30.62 |
| 05/02/2020<br>08:20 | 37.4 | 37.4 | 100   | M   | 2 | 30.65 |
| 05/02/2020<br>08:50 | 37.4 | 37.4 | 100   | M   | 2 | 30.65 |
| 05/02/2020<br>09:20 | 37.4 | 37.4 | 100   | M   | 2 | 30.65 |
| 05/02/2020<br>09:50 | 37.4 | 37.4 | 100   | M   | 3 | 30.65 |
| 05/02/2020<br>10:20 | 37.4 | 37.4 | 100   | M   | 3 | 30.65 |
| 05/02/2020<br>10:50 | 37.4 | 37.4 | 100   | M   | 3 | 30.65 |
| 05/02/2020<br>11:20 | 39.2 | 39.2 | 100   | M   | 3 | 30.65 |
| 05/02/2020<br>11:50 | 41   | 39.2 | 93.24 | M   | 2 | 30.65 |
| 05/02/2020<br>12:20 | 42.8 | 41   | 93.3  | M   | 2 | 30.65 |
| 05/02/2020<br>12:50 | 44.6 | 39.2 | 81.2  | M   | 3 | 30.65 |

|                     |      |      |       |     |   |       |
|---------------------|------|------|-------|-----|---|-------|
| 05/02/2020<br>13:20 | 44.6 | 39.2 | 81.2  | 240 | 5 | 30.65 |
| 05/02/2020<br>13:50 | 44.6 | 39.2 | 81.2  | M   | 3 | 30.62 |
| 05/02/2020<br>14:20 | 48.2 | 39.2 | 70.88 | M   | 2 | 30.62 |
| 05/02/2020<br>14:50 | 50   | 41   | 71.07 | M   | 3 | 30.62 |
| 05/02/2020<br>15:20 | 48.2 | 37.4 | 66.05 | M   | 3 | 30.62 |
| 05/02/2020<br>15:50 | 46.4 | 39.2 | 75.84 | 230 | 5 | 30.59 |
| 05/02/2020<br>16:20 | 46.4 | 37.4 | 70.68 | 210 | 4 | 30.59 |
| 05/02/2020<br>16:50 | 46.4 | 37.4 | 70.68 | 180 | 4 | 30.59 |
| 05/02/2020<br>17:20 | 46.4 | 37.4 | 70.68 | 200 | 4 | 30.59 |
| 05/02/2020<br>17:50 | 44.6 | 39.2 | 81.2  | 180 | 4 | 30.59 |
| 05/02/2020<br>18:20 | 44.6 | 39.2 | 81.2  | 180 | 5 | 30.59 |
| 05/02/2020<br>18:50 | 44.6 | 39.2 | 81.2  | 190 | 6 | 30.56 |
| 05/02/2020<br>19:20 | 42.8 | 39.2 | 86.99 | 210 | 6 | 30.56 |
| 05/02/2020<br>19:50 | 42.8 | 39.2 | 86.99 | 210 | 5 | 30.59 |
| 05/02/2020<br>20:20 | 41   | 39.2 | 93.24 | 190 | 7 | 30.56 |
| 05/02/2020<br>20:50 | 41   | 37.4 | 86.89 | 220 | 6 | 30.56 |
| 05/02/2020<br>21:20 | 41   | 37.4 | 86.89 | 230 | 6 | 30.59 |
| 05/02/2020<br>21:50 | 41   | 37.4 | 86.89 | 250 | 5 | 30.59 |
| 05/02/2020<br>22:20 | 39.2 | 37.4 | 93.19 | 230 | 6 | 30.56 |
| 05/02/2020<br>22:50 | 39.2 | 37.4 | 93.19 | 280 | 3 | 30.56 |
| 05/02/2020<br>23:20 | 37.4 | 35.6 | 93.14 | 260 | 2 | 30.59 |
| 05/02/2020<br>23:50 | 39.2 | 37.4 | 93.19 | 230 | 1 | 30.56 |
| 06/02/2020<br>00:20 | 37.4 | 35.6 | 93.14 | 210 | 2 | 30.56 |
| 06/02/2020<br>00:50 | 35.6 | 33.8 | 93.08 | 160 | 1 | 30.56 |



|                     |      |      |       |     |   |       |
|---------------------|------|------|-------|-----|---|-------|
| 06/02/2020<br>01:20 | 35.6 | 33.8 | 93.08 | 170 | 2 | 30.53 |
| 06/02/2020<br>01:50 | 33.8 | 33.8 | 100   | 180 | 1 | 30.53 |
| 06/02/2020<br>02:20 | 35.6 | 35.6 | 100   | 0   | 0 | 30.53 |
| 06/02/2020<br>02:50 | 33.8 | 32   | 93.03 | 270 | 1 | 30.53 |
| 06/02/2020<br>03:20 | 33.8 | 32   | 93.03 | 0   | 0 | 30.53 |
| 06/02/2020<br>03:50 | 33.8 | 33.8 | 100   | 0   | 0 | 30.5  |
| 06/02/2020<br>04:20 | 33.8 | 33.8 | 100   | 0   | 0 | 30.5  |
| 06/02/2020<br>04:50 | 33.8 | 32   | 93.03 | M   | 2 | 30.5  |
| 06/02/2020<br>05:20 | 32   | 32   | 100   | 300 | 1 | 30.5  |
| 06/02/2020<br>05:50 | 32   | 32   | 100   | 320 | 1 | 30.5  |
| 06/02/2020<br>06:20 | 32   | 32   | 100   | M   | 3 | 30.5  |
| 06/02/2020<br>06:50 | 32   | 32   | 100   | 340 | 2 | 30.5  |
| 06/02/2020<br>07:20 | 32   | 32   | 100   | M   | 1 | 30.47 |
| 06/02/2020<br>07:50 | 32   | 32   | 100   | M   | 1 | 30.5  |
| 06/02/2020<br>08:20 | 32   | 32   | 100   | M   | 1 | 30.47 |
| 06/02/2020<br>08:50 | 33.8 | 33.8 | 100   | 0   | 0 | 30.47 |
| 06/02/2020<br>09:20 | 33.8 | 33.8 | 100   | M   | 3 | 30.47 |
| 06/02/2020<br>09:50 | 35.6 | 35.6 | 100   | M   | 2 | 30.47 |
| 06/02/2020<br>10:20 | 35.6 | 35.6 | 100   | M   | 3 | 30.47 |
| 06/02/2020<br>10:50 | 35.6 | 35.6 | 100   | M   | 2 | 30.47 |
| 06/02/2020<br>11:20 | 37.4 | 37.4 | 100   | M   | 1 | 30.47 |
| 06/02/2020<br>11:50 | 39.2 | 39.2 | 100   | M   | 2 | 30.47 |
| 06/02/2020<br>12:20 | 41   | 41   | 100   | M   | 2 | 30.47 |
| 06/02/2020<br>12:50 | 42.8 | 41   | 93.3  | M   | 3 | 30.45 |

|                     |      |      |       |     |   |       |
|---------------------|------|------|-------|-----|---|-------|
| 06/02/2020<br>13:20 | 44.6 | 42.8 | 93.35 | M   | 2 | 30.45 |
| 06/02/2020<br>13:50 | 46.4 | 41   | 81.34 | M   | 2 | 30.42 |
| 06/02/2020<br>14:20 | 48.2 | 41   | 76.01 | M   | 3 | 30.42 |
| 06/02/2020<br>14:50 | 48.2 | 41   | 76.01 | M   | 2 | 30.42 |
| 06/02/2020<br>15:20 | 48.2 | 39.2 | 70.88 | M   | 3 | 30.42 |
| 06/02/2020<br>15:50 | 48.2 | 39.2 | 70.88 | M   | 3 | 30.42 |
| 06/02/2020<br>16:20 | 46.4 | 39.2 | 75.84 | M   | 2 | 30.39 |
| 06/02/2020<br>16:50 | 46.4 | 39.2 | 75.84 | M   | 1 | 30.39 |
| 06/02/2020<br>17:20 | 44.6 | 37.4 | 75.68 | 40  | 4 | 30.39 |
| 06/02/2020<br>17:50 | 42.8 | 37.4 | 81.07 | 60  | 2 | 30.39 |
| 06/02/2020<br>18:20 | 42.8 | 37.4 | 81.07 | 70  | 2 | 30.39 |
| 06/02/2020<br>18:50 | 42.8 | 37.4 | 81.07 | 70  | 3 | 30.39 |
| 06/02/2020<br>19:20 | 41   | 37.4 | 86.89 | 120 | 5 | 30.39 |
| 06/02/2020<br>19:50 | 42.8 | 37.4 | 81.07 | 130 | 7 | 30.39 |
| 06/02/2020<br>20:20 | 41   | 37.4 | 86.89 | 140 | 5 | 30.36 |
| 06/02/2020<br>20:50 | 41   | 37.4 | 86.89 | 110 | 4 | 30.36 |
| 06/02/2020<br>21:20 | 41   | 35.6 | 80.93 | 80  | 3 | 30.36 |
| 06/02/2020<br>21:50 | 39.2 | 35.6 | 86.79 | 90  | 4 | 30.36 |
| 06/02/2020<br>22:20 | 35.6 | 32   | 86.59 | 80  | 4 | 30.36 |
| 06/02/2020<br>22:50 | 35.6 | 33.8 | 93.08 | 80  | 4 | 30.33 |
| 06/02/2020<br>23:20 | 35.6 | 33.8 | 93.08 | 70  | 5 | 30.33 |
| 06/02/2020<br>23:50 | 37.4 | 33.8 | 86.69 | 60  | 3 | 30.33 |
| 07/02/2020<br>00:20 | 33.8 | 32   | 93.03 | 70  | 3 | 30.33 |
| 07/02/2020<br>00:50 | 37.4 | 35.6 | 93.14 | 70  | 4 | 30.3  |

|                     |      |      |       |     |    |       |
|---------------------|------|------|-------|-----|----|-------|
| 07/02/2020<br>01:20 | 35.6 | 33.8 | 93.08 | 80  | 5  | 30.3  |
| 07/02/2020<br>01:50 | 35.6 | 33.8 | 93.08 | M   | 2  | 30.3  |
| 07/02/2020<br>02:20 | 33.8 | 33.8 | 100   | 40  | 3  | 30.3  |
| 07/02/2020<br>02:50 | 33.8 | 32   | 93.03 | 70  | 3  | 30.27 |
| 07/02/2020<br>03:20 | 33.8 | 32   | 93.03 | 70  | 4  | 30.27 |
| 07/02/2020<br>03:50 | 35.6 | 33.8 | 93.08 | 70  | 5  | 30.24 |
| 07/02/2020<br>04:20 | 33.8 | 32   | 93.03 | 100 | 3  | 30.24 |
| 07/02/2020<br>04:50 | 35.6 | 33.8 | 93.08 | 90  | 6  | 30.21 |
| 07/02/2020<br>05:20 | 33.8 | 32   | 93.03 | 90  | 6  | 30.21 |
| 07/02/2020<br>05:50 | 33.8 | 32   | 93.03 | 90  | 7  | 30.18 |
| 07/02/2020<br>06:20 | 33.8 | 32   | 93.03 | 80  | 4  | 30.18 |
| 07/02/2020<br>06:50 | 35.6 | 33.8 | 93.08 | 70  | 3  | 30.18 |
| 07/02/2020<br>07:20 | 35.6 | 33.8 | 93.08 | 80  | 5  | 30.18 |
| 07/02/2020<br>07:50 | 33.8 | 32   | 93.03 | 80  | 5  | 30.15 |
| 07/02/2020<br>08:20 | 35.6 | 33.8 | 93.08 | 80  | 4  | 30.15 |
| 07/02/2020<br>08:50 | 35.6 | 33.8 | 93.08 | 90  | 5  | 30.15 |
| 07/02/2020<br>09:20 | 39.2 | 35.6 | 86.79 | 100 | 6  | 30.15 |
| 07/02/2020<br>09:50 | 41   | 37.4 | 86.89 | 110 | 6  | 30.12 |
| 07/02/2020<br>10:20 | 42.8 | 37.4 | 81.07 | 120 | 7  | 30.12 |
| 07/02/2020<br>10:50 | 44.6 | 37.4 | 75.68 | 130 | 8  | 30.09 |
| 07/02/2020<br>11:20 | 44.6 | 37.4 | 75.68 | 140 | 12 | 30.09 |
| 07/02/2020<br>11:50 | 46.4 | 37.4 | 70.68 | 150 | 8  | 30.06 |
| 07/02/2020<br>12:20 | 44.6 | 37.4 | 75.68 | 160 | 11 | 30.03 |
| 07/02/2020<br>12:50 | 46.4 | 37.4 | 70.68 | 170 | 11 | 30.03 |

|                     |      |      |       |     |    |       |
|---------------------|------|------|-------|-----|----|-------|
| 07/02/2020<br>13:20 | 48.2 | 37.4 | 66.05 | 160 | 10 | 30.03 |
| 07/02/2020<br>13:50 | 48.2 | 37.4 | 66.05 | 160 | 9  | 30    |
| 07/02/2020<br>14:20 | 48.2 | 35.6 | 61.52 | 170 | 10 | 30    |
| 07/02/2020<br>14:50 | 48.2 | 37.4 | 66.05 | 160 | 10 | 30    |
| 07/02/2020<br>15:20 | 46.4 | 37.4 | 70.68 | 170 | 11 | 30    |
| 07/02/2020<br>15:50 | 46.4 | 39.2 | 75.84 | 170 | 10 | 29.97 |
| 07/02/2020<br>16:20 | 46.4 | 39.2 | 75.84 | 180 | 8  | 29.97 |
| 07/02/2020<br>16:50 | 46.4 | 39.2 | 75.84 | 170 | 12 | 29.97 |
| 07/02/2020<br>17:20 | 46.4 | 39.2 | 75.84 | 180 | 10 | 29.97 |
| 07/02/2020<br>17:50 | 46.4 | 39.2 | 75.84 | 170 | 11 | 29.97 |
| 07/02/2020<br>18:20 | 46.4 | 41   | 81.34 | 170 | 10 | 29.97 |
| 07/02/2020<br>18:50 | 46.4 | 41   | 81.34 | 170 | 8  | 29.97 |
| 07/02/2020<br>19:20 | 46.4 | 41   | 81.34 | 160 | 9  | 29.94 |
| 07/02/2020<br>19:50 | 46.4 | 42.8 | 87.19 | 170 | 9  | 29.94 |
| 07/02/2020<br>20:20 | 48.2 | 42.8 | 81.47 | 170 | 9  | 29.94 |
| 07/02/2020<br>20:50 | 48.2 | 44.6 | 87.28 | 190 | 9  | 29.94 |
| 07/02/2020<br>21:20 | 48.2 | 44.6 | 87.28 | 190 | 11 | 29.94 |
| 07/02/2020<br>21:50 | 48.2 | 44.6 | 87.28 | 180 | 10 | 29.91 |
| 07/02/2020<br>22:20 | 48.2 | 44.6 | 87.28 | 180 | 12 | 29.91 |
| 07/02/2020<br>22:50 | 48.2 | 46.4 | 93.45 | 190 | 11 | 29.91 |
| 07/02/2020<br>23:20 | 50   | 46.4 | 87.37 | 190 | 13 | 29.91 |
| 07/02/2020<br>23:50 | 50   | 46.4 | 87.37 | 200 | 12 | 29.91 |
| 08/02/2020<br>00:20 | 50   | 46.4 | 87.37 | 190 | 12 | 29.91 |
| 08/02/2020<br>00:50 | 51.8 | 46.4 | 81.74 | 200 | 10 | 29.88 |

|                     |      |      |       |     |    |       |
|---------------------|------|------|-------|-----|----|-------|
| 08/02/2020<br>01:20 | 51.8 | 46.4 | 81.74 | 200 | 10 | 29.88 |
| 08/02/2020<br>01:50 | 51.8 | 46.4 | 81.74 | 200 | 10 | 29.88 |
| 08/02/2020<br>02:20 | 50   | 46.4 | 87.37 | 200 | 12 | 29.88 |
| 08/02/2020<br>02:50 | 50   | 48.2 | 93.5  | 200 | 10 | 29.88 |
| 08/02/2020<br>03:20 | 50   | 48.2 | 93.5  | 200 | 10 | 29.88 |
| 08/02/2020<br>03:50 | 50   | 48.2 | 93.5  | 210 | 8  | 29.88 |
| 08/02/2020<br>04:20 | 48.2 | 46.4 | 93.45 | 270 | 12 | 29.91 |
| 08/02/2020<br>04:50 | 48.2 | 44.6 | 87.28 | 250 | 9  | 29.91 |
| 08/02/2020<br>05:20 | 48.2 | 44.6 | 87.28 | 260 | 9  | 29.91 |
| 08/02/2020<br>05:50 | 46.4 | 42.8 | 87.19 | 250 | 10 | 29.94 |
| 08/02/2020<br>06:20 | 46.4 | 42.8 | 87.19 | 240 | 7  | 29.94 |
| 08/02/2020<br>06:50 | 46.4 | 42.8 | 87.19 | 240 | 7  | 29.94 |
| 08/02/2020<br>07:20 | 46.4 | 41   | 81.34 | 220 | 7  | 29.97 |
| 08/02/2020<br>07:50 | 46.4 | 41   | 81.34 | 220 | 8  | 29.97 |
| 08/02/2020<br>08:20 | 46.4 | 41   | 81.34 | 230 | 6  | 30    |
| 08/02/2020<br>08:50 | 46.4 | 41   | 81.34 | 230 | 8  | 30    |
| 08/02/2020<br>09:20 | 46.4 | 41   | 81.34 | 240 | 8  | 30.03 |
| 08/02/2020<br>09:50 | 46.4 | 41   | 81.34 | 220 | 8  | 30.03 |
| 08/02/2020<br>10:20 | 46.4 | 41   | 81.34 | 240 | 9  | 30.03 |
| 08/02/2020<br>10:50 | 48.2 | 41   | 76.01 | 240 | 10 | 30.03 |
| 08/02/2020<br>11:20 | 48.2 | 39.2 | 70.88 | 240 | 9  | 30.03 |
| 08/02/2020<br>11:50 | 48.2 | 39.2 | 70.88 | 220 | 8  | 30.03 |
| 08/02/2020<br>12:20 | 48.2 | 39.2 | 70.88 | 230 | 8  | 30.03 |
| 08/02/2020<br>12:50 | 50   | 39.2 | 66.27 | 240 | 10 | 30.03 |

|                     |      |      |       |     |    |       |
|---------------------|------|------|-------|-----|----|-------|
| 08/02/2020<br>13:20 | 50   | 37.4 | 61.76 | 230 | 11 | 30    |
| 08/02/2020<br>13:50 | 51.8 | 35.6 | 53.81 | 220 | 10 | 30    |
| 08/02/2020<br>14:20 | 51.8 | 35.6 | 53.81 | 220 | 12 | 30    |
| 08/02/2020<br>14:50 | 51.8 | 35.6 | 53.81 | 220 | 13 | 30    |
| 08/02/2020<br>15:20 | 50   | 35.6 | 57.52 | 210 | 15 | 30    |
| 08/02/2020<br>15:50 | 50   | 37.4 | 61.76 | 220 | 13 | 30    |
| 08/02/2020<br>16:20 | 50   | 37.4 | 61.76 | 220 | 15 | 30    |
| 08/02/2020<br>16:50 | 48.2 | 37.4 | 66.05 | 220 | 12 | 30    |
| 08/02/2020<br>17:20 | 46.4 | 37.4 | 70.68 | 210 | 11 | 30    |
| 08/02/2020<br>17:50 | 46.4 | 37.4 | 70.68 | 210 | 12 | 29.97 |
| 08/02/2020<br>18:20 | 46.4 | 37.4 | 70.68 | 200 | 12 | 29.97 |
| 08/02/2020<br>18:50 | 46.4 | 37.4 | 70.68 | 180 | 11 | 29.94 |
| 08/02/2020<br>19:20 | 44.6 | 39.2 | 81.2  | 190 | 12 | 29.94 |
| 08/02/2020<br>19:50 | 44.6 | 39.2 | 81.2  | 190 | 11 | 29.94 |
| 08/02/2020<br>20:20 | 44.6 | 39.2 | 81.2  | 200 | 11 | 29.94 |
| 08/02/2020<br>20:50 | 46.4 | 39.2 | 75.84 | 210 | 14 | 29.94 |
| 08/02/2020<br>21:20 | 46.4 | 39.2 | 75.84 | 200 | 12 | 29.91 |
| 08/02/2020<br>21:50 | 46.4 | 39.2 | 75.84 | 210 | 14 | 29.91 |
| 08/02/2020<br>22:20 | 48.2 | 39.2 | 70.88 | 210 | 14 | 29.88 |
| 08/02/2020<br>22:50 | 48.2 | 39.2 | 70.88 | 210 | 17 | 29.88 |
| 08/02/2020<br>23:20 | 48.2 | 39.2 | 70.88 | 210 | 18 | 29.85 |
| 08/02/2020<br>23:50 | 48.2 | 39.2 | 70.88 | 210 | 18 | 29.83 |
| 09/02/2020<br>00:20 | 48.2 | 39.2 | 70.88 | 210 | 18 | 29.8  |
| 09/02/2020<br>00:50 | 48.2 | 39.2 | 70.88 | 210 | 19 | 29.77 |

|                     |      |      |       |     |    |       |
|---------------------|------|------|-------|-----|----|-------|
| 09/02/2020<br>01:20 | 48.2 | 41   | 76.01 | 210 | 20 | 29.74 |
| 09/02/2020<br>01:50 | 48.2 | 41   | 76.01 | 200 | 23 | 29.71 |
| 09/02/2020<br>02:20 | 48.2 | 41   | 76.01 | 210 | 20 | 29.71 |
| 09/02/2020<br>02:50 | 48.2 | 41   | 76.01 | 210 | 22 | 29.71 |
| 09/02/2020<br>03:20 | 48.2 | 42.8 | 81.47 | 210 | 21 | 29.68 |
| 09/02/2020<br>03:50 | 48.2 | 42.8 | 81.47 | 210 | 20 | 29.65 |
| 09/02/2020<br>04:20 | 48.2 | 42.8 | 81.47 | 210 | 23 | 29.62 |
| 09/02/2020<br>04:50 | 48.2 | 44.6 | 87.28 | 210 | 23 | 29.59 |
| 09/02/2020<br>05:20 | 48.2 | 44.6 | 87.28 | 210 | 23 | 29.56 |
| 09/02/2020<br>05:50 | 48.2 | 44.6 | 87.28 | 210 | 23 | 29.53 |
| 09/02/2020<br>06:20 | 50   | 46.4 | 87.37 | 210 | 24 | 29.53 |
| 09/02/2020<br>06:50 | 50   | 46.4 | 87.37 | 210 | 24 | 29.47 |
| 09/02/2020<br>07:20 | 50   | 46.4 | 87.37 | 210 | 23 | 29.47 |
| 09/02/2020<br>07:50 | 50   | 48.2 | 93.5  | 210 | 21 | 29.44 |
| 09/02/2020<br>08:20 | 50   | 48.2 | 93.5  | 210 | 23 | 29.41 |
| 09/02/2020<br>08:50 | 51.8 | 48.2 | 87.47 | 210 | 25 | 29.38 |
| 09/02/2020<br>09:20 | 51.8 | 48.2 | 87.47 | 210 | 27 | 29.35 |
| 09/02/2020<br>09:50 | 51.8 | 50   | 93.55 | 220 | 27 | 29.35 |
| 09/02/2020<br>10:20 | 53.6 | 50   | 87.56 | 210 | 26 | 29.35 |
| 09/02/2020<br>10:50 | 53.6 | 50   | 87.56 | 210 | 26 | 29.32 |
| 09/02/2020<br>11:20 | 53.6 | 50   | 87.56 | 220 | 26 | 29.29 |
| 09/02/2020<br>11:50 | 53.6 | 50   | 87.56 | 210 | 28 | 29.23 |
| 09/02/2020<br>12:20 | 53.6 | 50   | 87.56 | 230 | 29 | 29.23 |
| 09/02/2020<br>12:50 | 53.6 | 51.8 | 93.6  | 220 | 27 | 29.21 |

|                     |      |      |       |     |    |       |
|---------------------|------|------|-------|-----|----|-------|
| 09/02/2020<br>13:20 | 53.6 | 51.8 | 93.6  | 220 | 27 | 29.18 |
| 09/02/2020<br>13:50 | 53.6 | 51.8 | 93.6  | 230 | 27 | 29.15 |
| 09/02/2020<br>14:20 | 53.6 | 53.6 | 100   | 220 | 28 | 29.15 |
| 09/02/2020<br>14:50 | 55.4 | 53.6 | 93.65 | 220 | 25 | 29.12 |
| 09/02/2020<br>15:20 | 55.4 | 53.6 | 93.65 | 230 | 27 | 29.12 |
| 09/02/2020<br>15:50 | 53.6 | 51.8 | 93.6  | 250 | 27 | 29.15 |
| 09/02/2020<br>16:20 | 51.8 | 48.2 | 87.47 | 250 | 25 | 29.12 |
| 09/02/2020<br>16:50 | 51.8 | 48.2 | 87.47 | 240 | 20 | 29.12 |
| 09/02/2020<br>17:20 | 51.8 | 48.2 | 87.47 | 240 | 22 | 29.15 |
| 09/02/2020<br>17:50 | 51.8 | 48.2 | 87.47 | 250 | 28 | 29.12 |
| 09/02/2020<br>18:20 | 51.8 | 46.4 | 81.74 | 240 | 22 | 29.12 |
| 09/02/2020<br>18:50 | 51.8 | 44.6 | 76.34 | 250 | 31 | 29.12 |
| 09/02/2020<br>19:20 | 51.8 | 44.6 | 76.34 | 250 | 19 | 29.15 |
| 09/02/2020<br>19:50 | 51.8 | 44.6 | 76.34 | 250 | 22 | 29.15 |
| 09/02/2020<br>20:20 | 51.8 | 42.8 | 71.26 | 250 | 22 | 29.15 |
| 09/02/2020<br>20:50 | 50   | 44.6 | 81.61 | 260 | 25 | 29.18 |
| 09/02/2020<br>21:20 | 50   | 42.8 | 76.18 | 260 | 24 | 29.18 |
| 09/02/2020<br>21:50 | 50   | 42.8 | 76.18 | 250 | 20 | 29.18 |
| 09/02/2020<br>22:20 | 51.8 | 42.8 | 71.26 | 250 | 21 | 29.18 |
| 09/02/2020<br>22:50 | 50   | 42.8 | 76.18 | 250 | 20 | 29.21 |
| 09/02/2020<br>23:20 | 50   | 41   | 71.07 | 250 | 21 | 29.21 |
| 09/02/2020<br>23:50 | 50   | 41   | 71.07 | 250 | 21 | 29.21 |
| 10/02/2020<br>00:20 | 50   | 39.2 | 66.27 | 250 | 22 | 29.21 |
| 10/02/2020<br>00:50 | 42.8 | 41   | 93.3  | 260 | 31 | 29.23 |



|                     |      |      |       |     |    |       |
|---------------------|------|------|-------|-----|----|-------|
| 10/02/2020<br>01:20 | 44.6 | 41   | 87.09 | 250 | 16 | 29.23 |
| 10/02/2020<br>01:50 | 46.4 | 41   | 81.34 | 250 | 22 | 29.23 |
| 10/02/2020<br>02:20 | 46.4 | 41   | 81.34 | 260 | 22 | 29.26 |
| 10/02/2020<br>02:50 | 46.4 | 39.2 | 75.84 | 260 | 26 | 29.29 |
| 10/02/2020<br>03:20 | 46.4 | 39.2 | 75.84 | 260 | 22 | 29.32 |
| 10/02/2020<br>03:50 | 44.6 | 37.4 | 75.68 | 260 | 22 | 29.35 |
| 10/02/2020<br>04:20 | 44.6 | 37.4 | 75.68 | 260 | 25 | 29.38 |
| 10/02/2020<br>04:50 | 44.6 | 33.8 | 65.61 | 260 | 21 | 29.41 |
| 10/02/2020<br>05:20 | 44.6 | 33.8 | 65.61 | 270 | 21 | 29.44 |
| 10/02/2020<br>05:50 | 44.6 | 33.8 | 65.61 | 260 | 22 | 29.47 |
| 10/02/2020<br>06:20 | 44.6 | 33.8 | 65.61 | 260 | 21 | 29.47 |
| 10/02/2020<br>06:50 | 42.8 | 32   | 65.38 | 270 | 22 | 29.5  |
| 10/02/2020<br>07:20 | 42.8 | 33.8 | 70.28 | 260 | 23 | 29.53 |
| 10/02/2020<br>07:50 | 42.8 | 33.8 | 70.28 | 250 | 20 | 29.53 |
| 10/02/2020<br>08:20 | 44.6 | 33.8 | 65.61 | 260 | 21 | 29.56 |
| 10/02/2020<br>08:50 | 44.6 | 35.6 | 70.48 | 240 | 17 | 29.56 |
| 10/02/2020<br>09:20 | 44.6 | 35.6 | 70.48 | 240 | 18 | 29.56 |
| 10/02/2020<br>09:50 | 46.4 | 35.6 | 65.83 | 240 | 20 | 29.56 |
| 10/02/2020<br>10:20 | 46.4 | 35.6 | 65.83 | 240 | 22 | 29.56 |
| 10/02/2020<br>10:50 | 48.2 | 35.6 | 61.52 | 240 | 22 | 29.56 |
| 10/02/2020<br>11:20 | 48.2 | 33.8 | 57.26 | 240 | 20 | 29.56 |
| 10/02/2020<br>11:50 | 48.2 | 35.6 | 61.52 | 230 | 19 | 29.53 |
| 10/02/2020<br>12:20 | 48.2 | 37.4 | 66.05 | 230 | 18 | 29.53 |
| 10/02/2020<br>12:50 | 48.2 | 39.2 | 70.88 | 220 | 16 | 29.47 |

|                     |      |      |       |     |    |       |
|---------------------|------|------|-------|-----|----|-------|
| 10/02/2020<br>13:20 | 48.2 | 39.2 | 70.88 | 230 | 18 | 29.44 |
| 10/02/2020<br>13:50 | 48.2 | 41   | 76.01 | 260 | 23 | 29.44 |
| 10/02/2020<br>14:20 | 46.4 | 37.4 | 70.68 | 260 | 20 | 29.41 |
| 10/02/2020<br>14:50 | 48.2 | 35.6 | 61.52 | 250 | 23 | 29.41 |
| 10/02/2020<br>15:20 | 48.2 | 35.6 | 61.52 | 250 | 27 | 29.41 |
| 10/02/2020<br>15:50 | 44.6 | 39.2 | 81.2  | 260 | 29 | 29.41 |
| 10/02/2020<br>16:20 | 44.6 | 39.2 | 81.2  | 260 | 25 | 29.41 |
| 10/02/2020<br>16:50 | 44.6 | 37.4 | 75.68 | 260 | 19 | 29.41 |
| 10/02/2020<br>17:20 | 42.8 | 37.4 | 81.07 | 250 | 16 | 29.41 |
| 10/02/2020<br>17:50 | 42.8 | 39.2 | 86.99 | 260 | 33 | 29.44 |
| 10/02/2020<br>18:20 | 39.2 | 37.4 | 93.19 | 290 | 18 | 29.47 |
| 10/02/2020<br>18:50 | 39.2 | 35.6 | 86.79 | 270 | 13 | 29.47 |
| 10/02/2020<br>19:20 | 39.2 | 33.8 | 80.79 | 270 | 16 | 29.5  |
| 10/02/2020<br>19:50 | 41   | 33.8 | 75.33 | 250 | 19 | 29.5  |
| 10/02/2020<br>20:20 | 41   | 33.8 | 75.33 | 250 | 20 | 29.5  |
| 10/02/2020<br>20:50 | 41   | 35.6 | 80.93 | 250 | 16 | 29.53 |
| 10/02/2020<br>21:20 | 41   | 33.8 | 75.33 | 260 | 21 | 29.53 |
| 10/02/2020<br>21:50 | 41   | 33.8 | 75.33 | 260 | 14 | 29.56 |
| 10/02/2020<br>22:20 | 41   | 32   | 70.08 | 250 | 17 | 29.56 |
| 10/02/2020<br>22:50 | 41   | 30.2 | 65.16 | 260 | 17 | 29.59 |
| 10/02/2020<br>23:20 | 41   | 30.2 | 65.16 | 250 | 17 | 29.59 |
| 10/02/2020<br>23:50 | 41   | 30.2 | 65.16 | 260 | 18 | 29.59 |
| 11/02/2020<br>00:20 | 41   | 28.4 | 60.54 | 270 | 20 | 29.59 |
| 11/02/2020<br>00:50 | 41   | 28.4 | 60.54 | 260 | 18 | 29.62 |

|                     |      |      |       |     |    |       |
|---------------------|------|------|-------|-----|----|-------|
| 11/02/2020<br>01:20 | 41   | 28.4 | 60.54 | 250 | 20 | 29.62 |
| 11/02/2020<br>01:50 | 41   | 28.4 | 60.54 | 260 | 19 | 29.62 |
| 11/02/2020<br>02:20 | 41   | 28.4 | 60.54 | 250 | 17 | 29.62 |
| 11/02/2020<br>02:50 | 41   | 30.2 | 65.16 | 250 | 17 | 29.65 |
| 11/02/2020<br>03:20 | 41   | 30.2 | 65.16 | 250 | 18 | 29.65 |
| 11/02/2020<br>03:50 | 41   | 28.4 | 60.54 | 260 | 18 | 29.65 |
| 11/02/2020<br>04:20 | 39.2 | 30.2 | 69.88 | 250 | 14 | 29.65 |
| 11/02/2020<br>04:50 | 41   | 30.2 | 65.16 | 250 | 16 | 29.68 |
| 11/02/2020<br>05:20 | 41   | 28.4 | 60.54 | 260 | 19 | 29.68 |
| 11/02/2020<br>05:50 | 41   | 28.4 | 60.54 | 260 | 15 | 29.68 |
| 11/02/2020<br>06:20 | 41   | 28.4 | 60.54 | 260 | 20 | 29.68 |
| 11/02/2020<br>06:50 | 41   | 28.4 | 60.54 | 260 | 20 | 29.71 |
| 11/02/2020<br>07:20 | 39.2 | 30.2 | 69.88 | 240 | 13 | 29.71 |
| 11/02/2020<br>07:50 | 39.2 | 30.2 | 69.88 | 240 | 13 | 29.71 |
| 11/02/2020<br>08:20 | 39.2 | 30.2 | 69.88 | 250 | 13 | 29.71 |
| 11/02/2020<br>08:50 | 41   | 32   | 70.08 | 250 | 15 | 29.71 |
| 11/02/2020<br>09:20 | 41   | 30.2 | 65.16 | 260 | 20 | 29.74 |
| 11/02/2020<br>09:50 | 42.8 | 32   | 65.38 | 260 | 18 | 29.74 |
| 11/02/2020<br>10:20 | 42.8 | 32   | 65.38 | 250 | 20 | 29.74 |
| 11/02/2020<br>10:50 | 44.6 | 32   | 61.03 | 260 | 20 | 29.77 |
| 11/02/2020<br>11:20 | 44.6 | 32   | 61.03 | 260 | 22 | 29.77 |
| 11/02/2020<br>11:50 | 44.6 | 32   | 61.03 | 260 | 23 | 29.77 |
| 11/02/2020<br>12:20 | 44.6 | 32   | 61.03 | 260 | 23 | 29.77 |
| 11/02/2020<br>12:50 | 44.6 | 30.2 | 56.74 | 260 | 21 | 29.77 |

|                     |      |      |       |     |    |       |
|---------------------|------|------|-------|-----|----|-------|
| 11/02/2020<br>13:20 | 44.6 | 26.6 | 48.96 | 260 | 25 | 29.77 |
| 11/02/2020<br>13:50 | 44.6 | 26.6 | 48.96 | 280 | 21 | 29.8  |
| 11/02/2020<br>14:20 | 46.4 | 26.6 | 45.73 | 280 | 22 | 29.8  |
| 11/02/2020<br>14:50 | 44.6 | 26.6 | 48.96 | 280 | 22 | 29.8  |
| 11/02/2020<br>15:20 | 44.6 | 26.6 | 48.96 | 270 | 18 | 29.8  |
| 11/02/2020<br>15:50 | 44.6 | 26.6 | 48.96 | 260 | 20 | 29.83 |
| 11/02/2020<br>16:20 | 42.8 | 26.6 | 52.45 | 270 | 21 | 29.83 |
| 11/02/2020<br>16:50 | 42.8 | 26.6 | 52.45 | 260 | 18 | 29.85 |
| 11/02/2020<br>17:20 | 42.8 | 28.4 | 56.48 | 260 | 19 | 29.85 |
| 11/02/2020<br>17:50 | 42.8 | 28.4 | 56.48 | 250 | 16 | 29.85 |
| 11/02/2020<br>18:20 | 42.8 | 30.2 | 60.79 | 250 | 17 | 29.85 |
| 11/02/2020<br>18:50 | 41   | 30.2 | 65.16 | 250 | 17 | 29.88 |
| 11/02/2020<br>19:20 | 41   | 30.2 | 65.16 | 250 | 15 | 29.88 |
| 11/02/2020<br>19:50 | 41   | 30.2 | 65.16 | 250 | 14 | 29.88 |
| 11/02/2020<br>20:20 | 41   | 30.2 | 65.16 | 250 | 15 | 29.88 |
| 11/02/2020<br>20:50 | 41   | 32   | 70.08 | 250 | 14 | 29.88 |
| 11/02/2020<br>21:20 | 41   | 32   | 70.08 | 240 | 16 | 29.88 |
| 11/02/2020<br>21:50 | 39.2 | 32   | 75.16 | 240 | 13 | 29.88 |
| 11/02/2020<br>22:20 | 39.2 | 32   | 75.16 | 250 | 14 | 29.88 |
| 11/02/2020<br>22:50 | 39.2 | 32   | 75.16 | 250 | 16 | 29.88 |
| 11/02/2020<br>23:20 | 39.2 | 33.8 | 80.79 | 240 | 15 | 29.91 |
| 11/02/2020<br>23:50 | 39.2 | 33.8 | 80.79 | 240 | 14 | 29.91 |
| 12/02/2020<br>00:20 | 39.2 | 33.8 | 80.79 | 240 | 13 | 29.91 |
| 12/02/2020<br>00:50 | 39.2 | 33.8 | 80.79 | 250 | 15 | 29.91 |

|                     |      |      |       |     |    |       |
|---------------------|------|------|-------|-----|----|-------|
| 12/02/2020<br>01:20 | 39.2 | 33.8 | 80.79 | 250 | 14 | 29.91 |
| 12/02/2020<br>01:50 | 37.4 | 33.8 | 86.69 | 250 | 13 | 29.91 |
| 12/02/2020<br>02:20 | 39.2 | 33.8 | 80.79 | 250 | 13 | 29.91 |
| 12/02/2020<br>02:50 | 37.4 | 33.8 | 86.69 | 250 | 13 | 29.91 |
| 12/02/2020<br>03:20 | 37.4 | 33.8 | 86.69 | 250 | 13 | 29.91 |
| 12/02/2020<br>03:50 | 37.4 | 32   | 80.65 | 250 | 12 | 29.91 |
| 12/02/2020<br>04:20 | 37.4 | 32   | 80.65 | 250 | 11 | 29.91 |
| 12/02/2020<br>04:50 | 37.4 | 32   | 80.65 | 250 | 13 | 29.91 |
| 12/02/2020<br>05:20 | 37.4 | 32   | 80.65 | 240 | 11 | 29.91 |
| 12/02/2020<br>05:50 | 37.4 | 33.8 | 86.69 | 240 | 12 | 29.94 |
| 12/02/2020<br>06:20 | 37.4 | 33.8 | 86.69 | 240 | 11 | 29.94 |
| 12/02/2020<br>06:50 | 37.4 | 33.8 | 86.69 | 240 | 12 | 29.94 |
| 12/02/2020<br>07:20 | 37.4 | 33.8 | 86.69 | 250 | 12 | 29.94 |
| 12/02/2020<br>07:50 | 37.4 | 33.8 | 86.69 | 250 | 13 | 29.97 |
| 12/02/2020<br>08:20 | 39.2 | 33.8 | 80.79 | 250 | 13 | 29.97 |
| 12/02/2020<br>08:50 | 39.2 | 33.8 | 80.79 | 250 | 12 | 29.97 |
| 12/02/2020<br>09:20 | 41   | 33.8 | 75.33 | 260 | 15 | 29.97 |
| 12/02/2020<br>09:50 | 41   | 33.8 | 75.33 | 270 | 14 | 29.97 |
| 12/02/2020<br>10:20 | 42.8 | 32   | 65.38 | 270 | 19 | 29.97 |
| 12/02/2020<br>10:50 | 44.6 | 32   | 61.03 | 270 | 19 | 30    |
| 12/02/2020<br>11:20 | 44.6 | 32   | 61.03 | 270 | 20 | 30    |
| 12/02/2020<br>11:50 | 46.4 | 32   | 57    | 270 | 19 | 30    |
| 12/02/2020<br>12:20 | 46.4 | 32   | 57    | 270 | 20 | 30    |
| 12/02/2020<br>12:50 | 46.4 | 30.2 | 53    | 260 | 17 | 30    |

|                     |      |      |       |     |    |       |
|---------------------|------|------|-------|-----|----|-------|
| 12/02/2020<br>13:20 | 48.2 | 30.2 | 49.53 | 260 | 16 | 30    |
| 12/02/2020<br>13:50 | 46.4 | 30.2 | 53    | 260 | 16 | 30    |
| 12/02/2020<br>14:20 | 46.4 | 30.2 | 53    | 260 | 16 | 29.97 |
| 12/02/2020<br>14:50 | 48.2 | 30.2 | 49.53 | 270 | 15 | 29.97 |
| 12/02/2020<br>15:20 | 48.2 | 30.2 | 49.53 | 260 | 12 | 29.97 |
| 12/02/2020<br>15:50 | 46.4 | 32   | 57    | 240 | 13 | 29.97 |
| 12/02/2020<br>16:20 | 46.4 | 33.8 | 61.28 | 240 | 12 | 29.97 |
| 12/02/2020<br>16:50 | 44.6 | 33.8 | 65.61 | 250 | 9  | 29.97 |
| 12/02/2020<br>17:20 | 44.6 | 33.8 | 65.61 | 240 | 6  | 29.97 |
| 12/02/2020<br>17:50 | 42.8 | 33.8 | 70.28 | 220 | 6  | 29.97 |
| 12/02/2020<br>18:20 | 42.8 | 33.8 | 70.28 | 210 | 6  | 29.97 |
| 12/02/2020<br>18:50 | 42.8 | 33.8 | 70.28 | 210 | 6  | 29.97 |
| 12/02/2020<br>19:20 | 42.8 | 33.8 | 70.28 | 190 | 7  | 29.94 |
| 12/02/2020<br>19:50 | 42.8 | 33.8 | 70.28 | 180 | 8  | 29.94 |
| 12/02/2020<br>20:20 | 44.6 | 35.6 | 70.48 | 190 | 8  | 29.91 |
| 12/02/2020<br>20:50 | 44.6 | 35.6 | 70.48 | 190 | 9  | 29.91 |
| 12/02/2020<br>21:20 | 42.8 | 37.4 | 81.07 | 190 | 10 | 29.88 |
| 12/02/2020<br>21:50 | 42.8 | 39.2 | 86.99 | 180 | 9  | 29.88 |
| 12/02/2020<br>22:20 | 42.8 | 39.2 | 86.99 | 170 | 8  | 29.85 |
| 12/02/2020<br>22:50 | 42.8 | 39.2 | 86.99 | 180 | 10 | 29.83 |
| 12/02/2020<br>23:20 | 42.8 | 39.2 | 86.99 | 170 | 8  | 29.8  |
| 12/02/2020<br>23:50 | 42.8 | 39.2 | 86.99 | 160 | 8  | 29.77 |
| 13/02/2020<br>00:20 | 42.8 | 39.2 | 86.99 | 170 | 8  | 29.74 |
| 13/02/2020<br>00:50 | 42.8 | 41   | 93.3  | 180 | 9  | 29.71 |

|                     |      |      |       |     |    |       |
|---------------------|------|------|-------|-----|----|-------|
| 13/02/2020<br>01:20 | 44.6 | 41   | 87.09 | 190 | 12 | 29.68 |
| 13/02/2020<br>01:50 | 44.6 | 41   | 87.09 | 180 | 14 | 29.65 |
| 13/02/2020<br>02:20 | 44.6 | 39.2 | 81.2  | 180 | 16 | 29.62 |
| 13/02/2020<br>02:50 | 42.8 | 39.2 | 86.99 | 180 | 17 | 29.56 |
| 13/02/2020<br>03:20 | 42.8 | 39.2 | 86.99 | 180 | 18 | 29.53 |
| 13/02/2020<br>03:50 | 42.8 | 39.2 | 86.99 | 160 | 19 | 29.47 |
| 13/02/2020<br>04:20 | 42.8 | 39.2 | 86.99 | 160 | 15 | 29.41 |
| 13/02/2020<br>04:50 | 42.8 | 41   | 93.3  | 170 | 15 | 29.38 |
| 13/02/2020<br>05:20 | 44.6 | 41   | 87.09 | 200 | 14 | 29.35 |
| 13/02/2020<br>05:50 | 44.6 | 41   | 87.09 | 220 | 12 | 29.35 |
| 13/02/2020<br>06:20 | 42.8 | 39.2 | 86.99 | 220 | 11 | 29.32 |
| 13/02/2020<br>06:50 | 42.8 | 39.2 | 86.99 | 220 | 13 | 29.32 |
| 13/02/2020<br>07:20 | 42.8 | 39.2 | 86.99 | 200 | 13 | 29.32 |
| 13/02/2020<br>07:50 | 41   | 39.2 | 93.24 | 200 | 11 | 29.32 |
| 13/02/2020<br>08:20 | 42.8 | 39.2 | 86.99 | 190 | 10 | 29.29 |
| 13/02/2020<br>08:50 | 42.8 | 39.2 | 86.99 | 200 | 10 | 29.29 |
| 13/02/2020<br>09:20 | 44.6 | 41   | 87.09 | 200 | 11 | 29.29 |
| 13/02/2020<br>09:50 | 46.4 | 41   | 81.34 | 220 | 11 | 29.26 |
| 13/02/2020<br>10:20 | 46.4 | 41   | 81.34 | 210 | 10 | 29.26 |
| 13/02/2020<br>10:50 | 48.2 | 41   | 76.01 | 230 | 13 | 29.26 |
| 13/02/2020<br>11:20 | 48.2 | 41   | 76.01 | 240 | 12 | 29.26 |
| 13/02/2020<br>11:50 | 48.2 | 41   | 76.01 | 240 | 9  | 29.26 |
| 13/02/2020<br>12:20 | 46.4 | 41   | 81.34 | 240 | 8  | 29.26 |
| 13/02/2020<br>12:50 | 46.4 | 41   | 81.34 | 240 | 9  | 29.26 |

|                     |      |      |       |     |    |       |
|---------------------|------|------|-------|-----|----|-------|
| 13/02/2020<br>13:20 | 48.2 | 41   | 76.01 | 290 | 10 | 29.26 |
| 13/02/2020<br>13:50 | 48.2 | 41   | 76.01 | 290 | 12 | 29.29 |
| 13/02/2020<br>14:20 | 50   | 39.2 | 66.27 | 290 | 14 | 29.32 |
| 13/02/2020<br>14:50 | 50   | 39.2 | 66.27 | 290 | 12 | 29.35 |
| 13/02/2020<br>15:20 | 46.4 | 41   | 81.34 | 300 | 9  | 29.38 |
| 13/02/2020<br>15:50 | 48.2 | 41   | 76.01 | 300 | 10 | 29.41 |
| 13/02/2020<br>16:20 | 48.2 | 41   | 76.01 | 300 | 8  | 29.44 |
| 13/02/2020<br>16:50 | 48.2 | 41   | 76.01 | 300 | 8  | 29.47 |
| 13/02/2020<br>17:20 | 46.4 | 39.2 | 75.84 | 290 | 11 | 29.53 |
| 13/02/2020<br>17:50 | 46.4 | 39.2 | 75.84 | 290 | 10 | 29.56 |
| 13/02/2020<br>18:20 | 46.4 | 39.2 | 75.84 | 290 | 7  | 29.59 |
| 13/02/2020<br>18:50 | 44.6 | 39.2 | 81.2  | 290 | 10 | 29.62 |
| 13/02/2020<br>19:20 | 46.4 | 39.2 | 75.84 | 290 | 7  | 29.65 |
| 13/02/2020<br>19:50 | 46.4 | 39.2 | 75.84 | 270 | 9  | 29.71 |
| 13/02/2020<br>20:20 | 46.4 | 39.2 | 75.84 | 290 | 11 | 29.71 |
| 13/02/2020<br>20:50 | 46.4 | 37.4 | 70.68 | 280 | 10 | 29.74 |
| 13/02/2020<br>21:20 | 44.6 | 37.4 | 75.68 | 290 | 9  | 29.77 |
| 13/02/2020<br>21:50 | 42.8 | 37.4 | 81.07 | 280 | 8  | 29.83 |
| 13/02/2020<br>22:20 | 42.8 | 37.4 | 81.07 | 280 | 7  | 29.83 |
| 13/02/2020<br>22:50 | 42.8 | 37.4 | 81.07 | 270 | 7  | 29.85 |
| 13/02/2020<br>23:20 | 42.8 | 37.4 | 81.07 | 270 | 7  | 29.85 |
| 13/02/2020<br>23:50 | 42.8 | 37.4 | 81.07 | 270 | 5  | 29.88 |
| 14/02/2020<br>00:20 | 42.8 | 37.4 | 81.07 | 280 | 7  | 29.91 |
| 14/02/2020<br>00:50 | 39.2 | 35.6 | 86.79 | 270 | 5  | 29.91 |



|                     |      |      |       |     |    |       |
|---------------------|------|------|-------|-----|----|-------|
| 14/02/2020<br>01:20 | 37.4 | 33.8 | 86.69 | 270 | 5  | 29.94 |
| 14/02/2020<br>01:50 | 37.4 | 33.8 | 86.69 | 280 | 5  | 29.94 |
| 14/02/2020<br>02:20 | 39.2 | 35.6 | 86.79 | 280 | 2  | 29.94 |
| 14/02/2020<br>02:50 | 37.4 | 33.8 | 86.69 | 280 | 4  | 29.97 |
| 14/02/2020<br>03:20 | 37.4 | 33.8 | 86.69 | 280 | 5  | 29.97 |
| 14/02/2020<br>03:50 | 37.4 | 35.6 | 93.14 | 280 | 5  | 30    |
| 14/02/2020<br>04:20 | 37.4 | 35.6 | 93.14 | M   | 2  | 30    |
| 14/02/2020<br>04:50 | 37.4 | 33.8 | 86.69 | 190 | 4  | 30    |
| 14/02/2020<br>05:20 | 37.4 | 33.8 | 86.69 | 200 | 4  | 30.03 |
| 14/02/2020<br>05:50 | 37.4 | 33.8 | 86.69 | M   | 2  | 30.03 |
| 14/02/2020<br>06:20 | 35.6 | 33.8 | 93.08 | M   | 3  | 30.03 |
| 14/02/2020<br>06:50 | 35.6 | 32   | 86.59 | 160 | 4  | 30.03 |
| 14/02/2020<br>07:20 | 35.6 | 33.8 | 93.08 | 210 | 5  | 30.06 |
| 14/02/2020<br>07:50 | 37.4 | 33.8 | 86.69 | 190 | 5  | 30.06 |
| 14/02/2020<br>08:20 | 37.4 | 35.6 | 93.14 | 210 | 6  | 30.06 |
| 14/02/2020<br>08:50 | 39.2 | 35.6 | 86.79 | 190 | 6  | 30.06 |
| 14/02/2020<br>09:20 | 42.8 | 37.4 | 81.07 | 210 | 9  | 30.09 |
| 14/02/2020<br>09:50 | 44.6 | 37.4 | 75.68 | 200 | 9  | 30.06 |
| 14/02/2020<br>10:20 | 46.4 | 39.2 | 75.84 | 210 | 10 | 30.09 |
| 14/02/2020<br>10:50 | 46.4 | 41   | 81.34 | 200 | 10 | 30.06 |
| 14/02/2020<br>11:20 | 50   | 42.8 | 76.18 | 200 | 10 | 30.06 |
| 14/02/2020<br>11:50 | 50   | 42.8 | 76.18 | 210 | 12 | 30.03 |
| 14/02/2020<br>12:20 | 51.8 | 42.8 | 71.26 | 220 | 15 | 30.03 |
| 14/02/2020<br>12:50 | 51.8 | 42.8 | 71.26 | 220 | 16 | 30.03 |

|                     |      |      |       |     |    |       |
|---------------------|------|------|-------|-----|----|-------|
| 14/02/2020<br>13:20 | 53.6 | 41   | 62.23 | 230 | 17 | 30.03 |
| 14/02/2020<br>13:50 | 51.8 | 41   | 66.48 | 230 | 17 | 30.03 |
| 14/02/2020<br>14:20 | 51.8 | 41   | 66.48 | 220 | 14 | 30.03 |
| 14/02/2020<br>14:50 | 51.8 | 42.8 | 71.26 | 210 | 14 | 30.03 |
| 14/02/2020<br>15:20 | 51.8 | 42.8 | 71.26 | 200 | 15 | 30    |
| 14/02/2020<br>15:50 | 51.8 | 44.6 | 76.34 | 210 | 15 | 30    |
| 14/02/2020<br>16:20 | 50   | 46.4 | 87.37 | 220 | 15 | 30.03 |
| 14/02/2020<br>16:50 | 50   | 46.4 | 87.37 | 210 | 13 | 30.03 |
| 14/02/2020<br>17:20 | 50   | 46.4 | 87.37 | 210 | 13 | 30.03 |
| 14/02/2020<br>17:50 | 50   | 44.6 | 81.61 | 210 | 14 | 30.03 |
| 14/02/2020<br>18:20 | 50   | 44.6 | 81.61 | 210 | 13 | 30    |
| 14/02/2020<br>18:50 | 50   | 44.6 | 81.61 | 210 | 15 | 30    |
| 14/02/2020<br>19:20 | 50   | 44.6 | 81.61 | 210 | 13 | 30    |
| 14/02/2020<br>19:50 | 51.8 | 44.6 | 76.34 | 200 | 13 | 30    |
| 14/02/2020<br>20:20 | 50   | 46.4 | 87.37 | 210 | 13 | 30    |
| 14/02/2020<br>20:50 | 51.8 | 44.6 | 76.34 | 210 | 15 | 30    |
| 14/02/2020<br>21:20 | 51.8 | 44.6 | 76.34 | 200 | 13 | 30    |
| 14/02/2020<br>21:50 | 51.8 | 46.4 | 81.74 | 200 | 15 | 30    |
| 14/02/2020<br>22:20 | 51.8 | 46.4 | 81.74 | 200 | 12 | 29.97 |
| 14/02/2020<br>22:50 | 51.8 | 46.4 | 81.74 | 210 | 14 | 29.97 |
| 14/02/2020<br>23:20 | 50   | 46.4 | 87.37 | 200 | 13 | 29.97 |
| 14/02/2020<br>23:50 | 50   | 48.2 | 93.5  | 200 | 12 | 29.97 |
| 15/02/2020<br>00:20 | 50   | 48.2 | 93.5  | 210 | 9  | 29.97 |
| 15/02/2020<br>00:50 | 50   | 48.2 | 93.5  | 200 | 8  | 29.97 |

|                     |      |      |       |     |    |       |
|---------------------|------|------|-------|-----|----|-------|
| 15/02/2020<br>01:20 | 50   | 48.2 | 93.5  | 180 | 12 | 29.94 |
| 15/02/2020<br>01:50 | 50   | 48.2 | 93.5  | 180 | 8  | 29.94 |
| 15/02/2020<br>02:20 | 50   | 48.2 | 93.5  | 190 | 9  | 29.94 |
| 15/02/2020<br>02:50 | 50   | 48.2 | 93.5  | 200 | 10 | 29.91 |
| 15/02/2020<br>03:20 | 50   | 48.2 | 93.5  | 200 | 12 | 29.91 |
| 15/02/2020<br>03:50 | 50   | 48.2 | 93.5  | 210 | 12 | 29.91 |
| 15/02/2020<br>04:20 | 50   | 48.2 | 93.5  | 200 | 10 | 29.88 |
| 15/02/2020<br>04:50 | 51.8 | 50   | 93.55 | 200 | 11 | 29.88 |
| 15/02/2020<br>05:20 | 51.8 | 50   | 93.55 | 200 | 14 | 29.85 |
| 15/02/2020<br>05:50 | 51.8 | 50   | 93.55 | 210 | 14 | 29.85 |
| 15/02/2020<br>06:20 | 51.8 | 50   | 93.55 | 200 | 13 | 29.85 |
| 15/02/2020<br>06:50 | 51.8 | 50   | 93.55 | 200 | 14 | 29.85 |
| 15/02/2020<br>07:20 | 51.8 | 50   | 93.55 | 200 | 16 | 29.83 |
| 15/02/2020<br>07:50 | 51.8 | 50   | 93.55 | 210 | 16 | 29.83 |
| 15/02/2020<br>08:20 | 53.6 | 48.2 | 81.87 | 210 | 17 | 29.83 |
| 15/02/2020<br>08:50 | 53.6 | 48.2 | 81.87 | 210 | 19 | 29.8  |
| 15/02/2020<br>09:20 | 53.6 | 48.2 | 81.87 | 210 | 18 | 29.8  |
| 15/02/2020<br>09:50 | 53.6 | 48.2 | 81.87 | 210 | 20 | 29.8  |
| 15/02/2020<br>10:20 | 53.6 | 48.2 | 81.87 | 210 | 18 | 29.77 |
| 15/02/2020<br>10:50 | 55.4 | 48.2 | 76.66 | 210 | 20 | 29.74 |
| 15/02/2020<br>11:20 | 55.4 | 48.2 | 76.66 | 210 | 20 | 29.74 |
| 15/02/2020<br>11:50 | 55.4 | 48.2 | 76.66 | 210 | 22 | 29.74 |
| 15/02/2020<br>12:20 | 53.6 | 48.2 | 81.87 | 210 | 21 | 29.71 |
| 15/02/2020<br>12:50 | 53.6 | 48.2 | 81.87 | 210 | 19 | 29.68 |

|                     |      |      |       |     |    |       |
|---------------------|------|------|-------|-----|----|-------|
| 15/02/2020<br>13:20 | 53.6 | 48.2 | 81.87 | 200 | 21 | 29.68 |
| 15/02/2020<br>13:50 | 53.6 | 48.2 | 81.87 | 210 | 21 | 29.65 |
| 15/02/2020<br>14:20 | 53.6 | 48.2 | 81.87 | 200 | 22 | 29.62 |
| 15/02/2020<br>14:50 | 53.6 | 48.2 | 81.87 | 200 | 23 | 29.59 |
| 15/02/2020<br>15:20 | 53.6 | 50   | 87.56 | 200 | 23 | 29.59 |
| 15/02/2020<br>15:50 | 53.6 | 50   | 87.56 | 210 | 21 | 29.56 |
| 15/02/2020<br>16:20 | 53.6 | 50   | 87.56 | 200 | 24 | 29.53 |
| 15/02/2020<br>16:50 | 53.6 | 50   | 87.56 | 210 | 25 | 29.53 |
| 15/02/2020<br>17:20 | 53.6 | 50   | 87.56 | 210 | 26 | 29.5  |
| 15/02/2020<br>17:50 | 53.6 | 50   | 87.56 | 210 | 25 | 29.5  |
| 15/02/2020<br>18:20 | 53.6 | 50   | 87.56 | 210 | 24 | 29.5  |
| 15/02/2020<br>18:50 | 53.6 | 50   | 87.56 | 210 | 25 | 29.47 |
| 15/02/2020<br>19:20 | 53.6 | 50   | 87.56 | 210 | 21 | 29.5  |
| 15/02/2020<br>19:50 | 53.6 | 50   | 87.56 | 220 | 22 | 29.5  |
| 15/02/2020<br>20:20 | 53.6 | 50   | 87.56 | 220 | 20 | 29.5  |
| 15/02/2020<br>20:50 | 53.6 | 50   | 87.56 | 220 | 20 | 29.5  |
| 15/02/2020<br>21:20 | 55.4 | 51.8 | 87.65 | 220 | 18 | 29.5  |
| 15/02/2020<br>21:50 | 55.4 | 51.8 | 87.65 | 210 | 18 | 29.47 |
| 15/02/2020<br>22:20 | 53.6 | 51.8 | 93.6  | 210 | 19 | 29.47 |
| 15/02/2020<br>22:50 | 53.6 | 51.8 | 93.6  | 210 | 19 | 29.44 |
| 15/02/2020<br>23:20 | 55.4 | 51.8 | 87.65 | 210 | 21 | 29.44 |
| 15/02/2020<br>23:50 | 55.4 | 51.8 | 87.65 | 210 | 21 | 29.41 |
| 16/02/2020<br>00:20 | 55.4 | 51.8 | 87.65 | 200 | 23 | 29.41 |
| 16/02/2020<br>00:50 | 55.4 | 51.8 | 87.65 | 210 | 23 | 29.38 |

|                     |      |      |       |     |    |       |
|---------------------|------|------|-------|-----|----|-------|
| 16/02/2020<br>01:20 | 55.4 | 51.8 | 87.65 | 210 | 25 | 29.38 |
| 16/02/2020<br>01:50 | 55.4 | 51.8 | 87.65 | 210 | 25 | 29.35 |
| 16/02/2020<br>02:20 | 55.4 | 51.8 | 87.65 | 210 | 23 | 29.38 |
| 16/02/2020<br>02:50 | 55.4 | 51.8 | 87.65 | 210 | 23 | 29.35 |
| 16/02/2020<br>03:20 | 55.4 | 51.8 | 87.65 | 210 | 22 | 29.32 |
| 16/02/2020<br>03:50 | 55.4 | 51.8 | 87.65 | 210 | 23 | 29.29 |
| 16/02/2020<br>04:20 | 55.4 | 51.8 | 87.65 | 200 | 26 | 29.29 |
| 16/02/2020<br>04:50 | 55.4 | 51.8 | 87.65 | 210 | 22 | 29.26 |
| 16/02/2020<br>05:20 | 55.4 | 51.8 | 87.65 | 210 | 22 | 29.26 |
| 16/02/2020<br>05:50 | 55.4 | 51.8 | 87.65 | 210 | 21 | 29.26 |
| 16/02/2020<br>06:20 | 55.4 | 51.8 | 87.65 | 210 | 23 | 29.26 |
| 16/02/2020<br>06:50 | 55.4 | 51.8 | 87.65 | 220 | 23 | 29.26 |
| 16/02/2020<br>07:20 | 55.4 | 51.8 | 87.65 | 230 | 23 | 29.26 |
| 16/02/2020<br>07:50 | 50   | 48.2 | 93.5  | 270 | 17 | 29.32 |
| 16/02/2020<br>08:20 | 51.8 | 46.4 | 81.74 | 240 | 14 | 29.35 |
| 16/02/2020<br>08:50 | 51.8 | 48.2 | 87.47 | 220 | 14 | 29.32 |
| 16/02/2020<br>09:20 | 53.6 | 46.4 | 76.5  | 240 | 15 | 29.35 |
| 16/02/2020<br>09:50 | 51.8 | 46.4 | 81.74 | 230 | 16 | 29.35 |
| 16/02/2020<br>10:20 | 51.8 | 46.4 | 81.74 | 230 | 16 | 29.35 |
| 16/02/2020<br>10:50 | 50   | 46.4 | 87.37 | 220 | 16 | 29.32 |
| 16/02/2020<br>11:20 | 50   | 46.4 | 87.37 | 230 | 15 | 29.35 |
| 16/02/2020<br>11:50 | 50   | 46.4 | 87.37 | 230 | 12 | 29.32 |
| 16/02/2020<br>12:20 | 48.2 | 42.8 | 81.47 | 240 | 20 | 29.35 |
| 16/02/2020<br>12:50 | 48.2 | 44.6 | 87.28 | 240 | 14 | 29.35 |

|                     |      |      |       |     |    |       |
|---------------------|------|------|-------|-----|----|-------|
| 16/02/2020<br>13:20 | 48.2 | 42.8 | 81.47 | 250 | 17 | 29.35 |
| 16/02/2020<br>13:50 | 46.4 | 41   | 81.34 | 260 | 20 | 29.38 |
| 16/02/2020<br>14:20 | 44.6 | 41   | 87.09 | 240 | 15 | 29.38 |
| 16/02/2020<br>14:50 | 44.6 | 41   | 87.09 | 240 | 15 | 29.41 |
| 16/02/2020<br>15:20 | 44.6 | 41   | 87.09 | 220 | 12 | 29.38 |
| 16/02/2020<br>15:50 | 46.4 | 41   | 81.34 | 230 | 16 | 29.41 |
| 16/02/2020<br>16:20 | 46.4 | 41   | 81.34 | 230 | 17 | 29.44 |
| 16/02/2020<br>16:50 | 46.4 | 41   | 81.34 | 230 | 15 | 29.44 |
| 16/02/2020<br>17:20 | 46.4 | 41   | 81.34 | 230 | 15 | 29.44 |
| 16/02/2020<br>17:50 | 46.4 | 41   | 81.34 | 220 | 15 | 29.47 |
| 16/02/2020<br>18:20 | 46.4 | 39.2 | 75.84 | 220 | 14 | 29.47 |
| 16/02/2020<br>18:50 | 46.4 | 39.2 | 75.84 | 230 | 17 | 29.5  |
| 16/02/2020<br>19:20 | 46.4 | 39.2 | 75.84 | 230 | 18 | 29.53 |
| 16/02/2020<br>19:50 | 46.4 | 37.4 | 70.68 | 230 | 20 | 29.53 |
| 16/02/2020<br>20:20 | 46.4 | 37.4 | 70.68 | 230 | 20 | 29.56 |
| 16/02/2020<br>20:50 | 44.6 | 35.6 | 70.48 | 250 | 20 | 29.59 |
| 16/02/2020<br>21:20 | 44.6 | 33.8 | 65.61 | 250 | 22 | 29.59 |
| 16/02/2020<br>21:50 | 44.6 | 33.8 | 65.61 | 250 | 19 | 29.62 |
| 16/02/2020<br>22:20 | 42.8 | 33.8 | 70.28 | 240 | 18 | 29.65 |
| 16/02/2020<br>22:50 | 42.8 | 33.8 | 70.28 | 250 | 20 | 29.65 |
| 16/02/2020<br>23:20 | 42.8 | 33.8 | 70.28 | 240 | 17 | 29.68 |
| 16/02/2020<br>23:50 | 42.8 | 33.8 | 70.28 | 240 | 14 | 29.71 |
| 17/02/2020<br>00:20 | 42.8 | 33.8 | 70.28 | 230 | 17 | 29.71 |
| 17/02/2020<br>00:50 | 42.8 | 33.8 | 70.28 | 230 | 15 | 29.71 |

|                     |      |      |       |     |    |       |
|---------------------|------|------|-------|-----|----|-------|
| 17/02/2020<br>01:20 | 42.8 | 32   | 65.38 | 230 | 18 | 29.71 |
| 17/02/2020<br>01:50 | 44.6 | 33.8 | 65.61 | 230 | 16 | 29.71 |
| 17/02/2020<br>02:20 | 42.8 | 33.8 | 70.28 | 220 | 13 | 29.71 |
| 17/02/2020<br>02:50 | 44.6 | 33.8 | 65.61 | 220 | 14 | 29.71 |
| 17/02/2020<br>03:20 | 44.6 | 33.8 | 65.61 | 230 | 12 | 29.71 |
| 17/02/2020<br>03:50 | 44.6 | 33.8 | 65.61 | 230 | 16 | 29.71 |
| 17/02/2020<br>04:20 | 44.6 | 33.8 | 65.61 | 230 | 14 | 29.71 |
| 17/02/2020<br>04:50 | 46.4 | 35.6 | 65.83 | 220 | 16 | 29.71 |
| 17/02/2020<br>05:20 | 46.4 | 35.6 | 65.83 | 220 | 16 | 29.71 |
| 17/02/2020<br>05:50 | 46.4 | 35.6 | 65.83 | 230 | 18 | 29.71 |
| 17/02/2020<br>06:20 | 46.4 | 37.4 | 70.68 | 220 | 16 | 29.71 |
| 17/02/2020<br>06:50 | 44.6 | 35.6 | 70.48 | 240 | 21 | 29.71 |
| 17/02/2020<br>07:20 | 44.6 | 35.6 | 70.48 | 240 | 20 | 29.71 |
| 17/02/2020<br>07:50 | 42.8 | 33.8 | 70.28 | 230 | 16 | 29.74 |
| 17/02/2020<br>08:20 | 42.8 | 33.8 | 70.28 | 220 | 15 | 29.74 |
| 17/02/2020<br>08:50 | 44.6 | 33.8 | 65.61 | 230 | 15 | 29.74 |
| 17/02/2020<br>09:20 | 44.6 | 37.4 | 75.68 | 220 | 16 | 29.74 |
| 17/02/2020<br>09:50 | 46.4 | 35.6 | 65.83 | 230 | 17 | 29.74 |
| 17/02/2020<br>10:20 | 46.4 | 35.6 | 65.83 | 240 | 19 | 29.77 |
| 17/02/2020<br>10:50 | 48.2 | 37.4 | 66.05 | 240 | 19 | 29.77 |
| 17/02/2020<br>11:20 | 48.2 | 37.4 | 66.05 | 240 | 17 | 29.77 |
| 17/02/2020<br>11:50 | 50   | 37.4 | 61.76 | 240 | 20 | 29.77 |
| 17/02/2020<br>12:20 | 50   | 37.4 | 61.76 | 250 | 16 | 29.77 |
| 17/02/2020<br>12:50 | 50   | 37.4 | 61.76 | 250 | 16 | 29.77 |

|                     |      |      |       |     |    |       |
|---------------------|------|------|-------|-----|----|-------|
| 17/02/2020<br>13:20 | 50   | 39.2 | 66.27 | 250 | 14 | 29.8  |
| 17/02/2020<br>13:50 | 51.8 | 39.2 | 61.99 | 260 | 17 | 29.8  |
| 17/02/2020<br>14:20 | 51.8 | 39.2 | 61.99 | 260 | 16 | 29.8  |
| 17/02/2020<br>14:50 | 50   | 39.2 | 66.27 | 260 | 16 | 29.8  |
| 17/02/2020<br>15:20 | 51.8 | 37.4 | 57.77 | 270 | 17 | 29.83 |
| 17/02/2020<br>15:50 | 50   | 37.4 | 61.76 | 260 | 18 | 29.83 |
| 17/02/2020<br>16:20 | 50   | 37.4 | 61.76 | 260 | 19 | 29.85 |
| 17/02/2020<br>16:50 | 48.2 | 37.4 | 66.05 | 260 | 17 | 29.88 |
| 17/02/2020<br>17:20 | 48.2 | 37.4 | 66.05 | 260 | 18 | 29.88 |
| 17/02/2020<br>17:50 | 48.2 | 35.6 | 61.52 | 260 | 19 | 29.91 |
| 17/02/2020<br>18:20 | 48.2 | 35.6 | 61.52 | 260 | 19 | 29.91 |
| 17/02/2020<br>18:50 | 46.4 | 37.4 | 70.68 | 250 | 17 | 29.94 |
| 17/02/2020<br>19:20 | 46.4 | 37.4 | 70.68 | 250 | 15 | 29.94 |
| 17/02/2020<br>19:50 | 46.4 | 37.4 | 70.68 | 250 | 16 | 29.97 |
| 17/02/2020<br>20:20 | 44.6 | 35.6 | 70.48 | 250 | 17 | 29.97 |
| 17/02/2020<br>20:50 | 44.6 | 33.8 | 65.61 | 260 | 17 | 30    |
| 17/02/2020<br>21:20 | 42.8 | 33.8 | 70.28 | 250 | 16 | 30    |
| 17/02/2020<br>21:50 | 42.8 | 33.8 | 70.28 | 260 | 17 | 30.03 |
| 17/02/2020<br>22:20 | 42.8 | 33.8 | 70.28 | 250 | 14 | 30.03 |
| 17/02/2020<br>22:50 | 42.8 | 33.8 | 70.28 | 250 | 14 | 30.03 |
| 17/02/2020<br>23:20 | 42.8 | 33.8 | 70.28 | 250 | 14 | 30.06 |
| 17/02/2020<br>23:50 | 42.8 | 33.8 | 70.28 | 240 | 15 | 30.06 |
| 18/02/2020<br>00:20 | 41   | 35.6 | 80.93 | 240 | 14 | 30.06 |
| 18/02/2020<br>00:50 | 42.8 | 33.8 | 70.28 | 240 | 15 | 30.06 |



|                     |      |      |       |     |    |       |
|---------------------|------|------|-------|-----|----|-------|
| 18/02/2020<br>01:20 | 41   | 33.8 | 75.33 | 240 | 13 | 30.09 |
| 18/02/2020<br>01:50 | 41   | 33.8 | 75.33 | 240 | 10 | 30.09 |
| 18/02/2020<br>02:20 | 41   | 33.8 | 75.33 | 240 | 13 | 30.09 |
| 18/02/2020<br>02:50 | 41   | 33.8 | 75.33 | 240 | 11 | 30.09 |
| 18/02/2020<br>03:20 | 41   | 33.8 | 75.33 | 240 | 9  | 30.09 |
| 18/02/2020<br>03:50 | 41   | 33.8 | 75.33 | 240 | 12 | 30.09 |
| 18/02/2020<br>04:20 | 41   | 33.8 | 75.33 | 240 | 12 | 30.09 |
| 18/02/2020<br>04:50 | 41   | 33.8 | 75.33 | 240 | 12 | 30.09 |
| 18/02/2020<br>05:20 | 41   | 33.8 | 75.33 | 230 | 10 | 30.12 |
| 18/02/2020<br>05:50 | 41   | 33.8 | 75.33 | 230 | 9  | 30.12 |
| 18/02/2020<br>06:20 | 41   | 35.6 | 80.93 | 240 | 12 | 30.12 |
| 18/02/2020<br>06:50 | 41   | 33.8 | 75.33 | 230 | 10 | 30.12 |
| 18/02/2020<br>07:20 | 41   | 35.6 | 80.93 | 230 | 11 | 30.12 |
| 18/02/2020<br>07:50 | 41   | 35.6 | 80.93 | 230 | 12 | 30.12 |
| 18/02/2020<br>08:20 | 42.8 | 35.6 | 75.5  | 230 | 10 | 30.15 |
| 18/02/2020<br>08:50 | 42.8 | 35.6 | 75.5  | 230 | 12 | 30.15 |
| 18/02/2020<br>09:20 | 44.6 | 35.6 | 70.48 | 220 | 12 | 30.12 |
| 18/02/2020<br>09:50 | 46.4 | 35.6 | 65.83 | 230 | 13 | 30.12 |
| 18/02/2020<br>10:20 | 48.2 | 37.4 | 66.05 | 230 | 16 | 30.12 |
| 18/02/2020<br>10:50 | 48.2 | 37.4 | 66.05 | 230 | 15 | 30.12 |
| 18/02/2020<br>11:20 | 50   | 37.4 | 61.76 | 240 | 18 | 30.12 |
| 18/02/2020<br>11:50 | 50   | 37.4 | 61.76 | 240 | 19 | 30.09 |
| 18/02/2020<br>12:20 | 50   | 37.4 | 61.76 | 250 | 21 | 30.09 |
| 18/02/2020<br>12:50 | 50   | 37.4 | 61.76 | 240 | 20 | 30.09 |

|                     |      |      |       |     |    |       |
|---------------------|------|------|-------|-----|----|-------|
| 18/02/2020<br>13:20 | 50   | 37.4 | 61.76 | 240 | 19 | 30.06 |
| 18/02/2020<br>13:50 | 51.8 | 39.2 | 61.99 | 240 | 18 | 30.06 |
| 18/02/2020<br>14:20 | 51.8 | 39.2 | 61.99 | 230 | 20 | 30.06 |
| 18/02/2020<br>14:50 | 44.6 | 39.2 | 81.2  | 260 | 18 | 30.06 |
| 18/02/2020<br>15:20 | 46.4 | 41   | 81.34 | 240 | 12 | 30.03 |
| 18/02/2020<br>15:50 | 46.4 | 41   | 81.34 | 230 | 11 | 30    |
| 18/02/2020<br>16:20 | 46.4 | 41   | 81.34 | 210 | 12 | 30    |
| 18/02/2020<br>16:50 | 48.2 | 41   | 76.01 | 210 | 12 | 30    |
| 18/02/2020<br>17:20 | 48.2 | 41   | 76.01 | 230 | 13 | 29.97 |
| 18/02/2020<br>17:50 | 48.2 | 41   | 76.01 | 230 | 15 | 29.97 |
| 18/02/2020<br>18:20 | 48.2 | 41   | 76.01 | 240 | 22 | 29.97 |
| 18/02/2020<br>18:50 | 44.6 | 37.4 | 75.68 | 240 | 17 | 29.97 |
| 18/02/2020<br>19:20 | 44.6 | 37.4 | 75.68 | 240 | 14 | 29.94 |
| 18/02/2020<br>19:50 | 44.6 | 37.4 | 75.68 | 240 | 15 | 29.94 |
| 18/02/2020<br>20:20 | 44.6 | 37.4 | 75.68 | 250 | 15 | 29.94 |
| 18/02/2020<br>20:50 | 44.6 | 35.6 | 70.48 | 260 | 17 | 29.97 |
| 18/02/2020<br>21:20 | 41   | 37.4 | 86.89 | 270 | 9  | 29.97 |
| 18/02/2020<br>21:50 | 42.8 | 37.4 | 81.07 | 270 | 14 | 29.97 |
| 18/02/2020<br>22:20 | 42.8 | 35.6 | 75.5  | 280 | 10 | 29.97 |
| 18/02/2020<br>22:50 | 41   | 35.6 | 80.93 | 270 | 12 | 30    |
| 18/02/2020<br>23:20 | 41   | 35.6 | 80.93 | 270 | 12 | 30    |
| 18/02/2020<br>23:50 | 41   | 33.8 | 75.33 | 270 | 10 | 30    |
| 19/02/2020<br>00:20 | 41   | 33.8 | 75.33 | 290 | 14 | 30.03 |
| 19/02/2020<br>00:50 | 41   | 33.8 | 75.33 | 290 | 12 | 30.03 |

|                     |      |      |       |     |    |       |
|---------------------|------|------|-------|-----|----|-------|
| 19/02/2020<br>01:20 | 39.2 | 32   | 75.16 | 270 | 9  | 30.06 |
| 19/02/2020<br>01:50 | 39.2 | 33.8 | 80.79 | 270 | 11 | 30.06 |
| 19/02/2020<br>02:20 | 39.2 | 32   | 75.16 | 280 | 13 | 30.06 |
| 19/02/2020<br>02:50 | 39.2 | 32   | 75.16 | 280 | 13 | 30.06 |
| 19/02/2020<br>03:20 | 39.2 | 32   | 75.16 | 280 | 10 | 30.09 |
| 19/02/2020<br>03:50 | 37.4 | 32   | 80.65 | 290 | 10 | 30.09 |
| 19/02/2020<br>04:20 | 37.4 | 32   | 80.65 | 270 | 9  | 30.09 |
| 19/02/2020<br>04:50 | 37.4 | 32   | 80.65 | 270 | 10 | 30.09 |
| 19/02/2020<br>05:20 | 37.4 | 32   | 80.65 | 270 | 9  | 30.12 |
| 19/02/2020<br>05:50 | 37.4 | 32   | 80.65 | 270 | 11 | 30.12 |
| 19/02/2020<br>06:20 | 39.2 | 32   | 75.16 | 260 | 10 | 30.15 |
| 19/02/2020<br>06:50 | 39.2 | 32   | 75.16 | 270 | 5  | 30.15 |
| 19/02/2020<br>07:20 | 39.2 | 32   | 75.16 | 250 | 9  | 30.15 |
| 19/02/2020<br>07:50 | 39.2 | 32   | 75.16 | 230 | 8  | 30.15 |
| 19/02/2020<br>08:20 | 39.2 | 33.8 | 80.79 | 230 | 8  | 30.18 |
| 19/02/2020<br>08:50 | 41   | 33.8 | 75.33 | 240 | 11 | 30.18 |
| 19/02/2020<br>09:20 | 41   | 33.8 | 75.33 | 240 | 8  | 30.18 |
| 19/02/2020<br>09:50 | 42.8 | 33.8 | 70.28 | 250 | 9  | 30.18 |
| 19/02/2020<br>10:20 | 42.8 | 35.6 | 75.5  | 230 | 9  | 30.18 |
| 19/02/2020<br>10:50 | 44.6 | 35.6 | 70.48 | 240 | 10 | 30.18 |
| 19/02/2020<br>11:20 | 44.6 | 35.6 | 70.48 | 240 | 11 | 30.18 |
| 19/02/2020<br>11:50 | 44.6 | 37.4 | 75.68 | 240 | 12 | 30.18 |
| 19/02/2020<br>12:20 | 44.6 | 39.2 | 81.2  | 230 | 11 | 30.18 |
| 19/02/2020<br>12:50 | 44.6 | 39.2 | 81.2  | 230 | 10 | 30.15 |

|                     |      |      |       |     |    |       |
|---------------------|------|------|-------|-----|----|-------|
| 19/02/2020<br>13:20 | 44.6 | 41   | 87.09 | 210 | 8  | 30.15 |
| 19/02/2020<br>13:50 | 44.6 | 41   | 87.09 | 210 | 8  | 30.12 |
| 19/02/2020<br>14:20 | 44.6 | 42.8 | 93.35 | 210 | 9  | 30.12 |
| 19/02/2020<br>14:50 | 46.4 | 42.8 | 87.19 | 200 | 9  | 30.09 |
| 19/02/2020<br>15:20 | 46.4 | 42.8 | 87.19 | 200 | 10 | 30.06 |
| 19/02/2020<br>15:50 | 48.2 | 42.8 | 81.47 | 210 | 11 | 30.06 |
| 19/02/2020<br>16:20 | 48.2 | 44.6 | 87.28 | 210 | 10 | 30.06 |
| 19/02/2020<br>16:50 | 48.2 | 44.6 | 87.28 | 210 | 8  | 30.03 |
| 19/02/2020<br>17:20 | 48.2 | 44.6 | 87.28 | 210 | 9  | 30.03 |
| 19/02/2020<br>17:50 | 48.2 | 44.6 | 87.28 | 210 | 10 | 30    |
| 19/02/2020<br>18:20 | 48.2 | 44.6 | 87.28 | 210 | 13 | 30    |
| 19/02/2020<br>18:50 | 48.2 | 44.6 | 87.28 | 220 | 14 | 30    |
| 19/02/2020<br>19:20 | 48.2 | 44.6 | 87.28 | 220 | 14 | 30    |
| 19/02/2020<br>19:50 | 48.2 | 44.6 | 87.28 | 200 | 10 | 29.97 |
| 19/02/2020<br>20:20 | 48.2 | 44.6 | 87.28 | 220 | 11 | 29.97 |
| 19/02/2020<br>20:50 | 48.2 | 44.6 | 87.28 | 220 | 13 | 29.97 |
| 19/02/2020<br>21:20 | 48.2 | 42.8 | 81.47 | 220 | 13 | 29.97 |
| 19/02/2020<br>21:50 | 48.2 | 42.8 | 81.47 | 230 | 12 | 29.94 |
| 19/02/2020<br>22:20 | 48.2 | 42.8 | 81.47 | 220 | 12 | 29.94 |
| 19/02/2020<br>22:50 | 48.2 | 42.8 | 81.47 | 230 | 16 | 29.94 |
| 19/02/2020<br>23:20 | 48.2 | 42.8 | 81.47 | 220 | 11 | 29.94 |
| 19/02/2020<br>23:50 | 48.2 | 42.8 | 81.47 | 220 | 12 | 29.91 |
| 20/02/2020<br>00:20 | 48.2 | 44.6 | 87.28 | 230 | 12 | 29.91 |
| 20/02/2020<br>00:50 | 48.2 | 44.6 | 87.28 | 220 | 12 | 29.91 |

|                     |      |      |       |     |    |       |
|---------------------|------|------|-------|-----|----|-------|
| 20/02/2020<br>01:20 | 48.2 | 44.6 | 87.28 | 220 | 10 | 29.91 |
| 20/02/2020<br>01:50 | 48.2 | 44.6 | 87.28 | 230 | 13 | 29.88 |
| 20/02/2020<br>02:20 | 48.2 | 44.6 | 87.28 | 220 | 12 | 29.88 |
| 20/02/2020<br>02:50 | 48.2 | 44.6 | 87.28 | 230 | 12 | 29.88 |
| 20/02/2020<br>03:20 | 48.2 | 44.6 | 87.28 | 230 | 12 | 29.88 |
| 20/02/2020<br>03:50 | 48.2 | 42.8 | 81.47 | 220 | 14 | 29.85 |
| 20/02/2020<br>04:20 | 48.2 | 42.8 | 81.47 | 210 | 12 | 29.85 |
| 20/02/2020<br>04:50 | 48.2 | 42.8 | 81.47 | 220 | 12 | 29.83 |
| 20/02/2020<br>05:20 | 48.2 | 44.6 | 87.28 | 220 | 12 | 29.83 |
| 20/02/2020<br>05:50 | 48.2 | 44.6 | 87.28 | 220 | 14 | 29.83 |
| 20/02/2020<br>06:20 | 48.2 | 44.6 | 87.28 | 210 | 14 | 29.83 |
| 20/02/2020<br>06:50 | 48.2 | 44.6 | 87.28 | 220 | 13 | 29.8  |
| 20/02/2020<br>07:20 | 48.2 | 44.6 | 87.28 | 210 | 13 | 29.8  |
| 20/02/2020<br>07:50 | 48.2 | 44.6 | 87.28 | 210 | 14 | 29.8  |
| 20/02/2020<br>08:20 | 48.2 | 44.6 | 87.28 | 210 | 15 | 29.77 |
| 20/02/2020<br>08:50 | 50   | 44.6 | 81.61 | 210 | 17 | 29.77 |
| 20/02/2020<br>09:20 | 50   | 44.6 | 81.61 | 220 | 16 | 29.77 |
| 20/02/2020<br>09:50 | 50   | 44.6 | 81.61 | 210 | 14 | 29.77 |
| 20/02/2020<br>10:20 | 50   | 44.6 | 81.61 | 210 | 16 | 29.74 |
| 20/02/2020<br>10:50 | 50   | 44.6 | 81.61 | 210 | 18 | 29.74 |
| 20/02/2020<br>11:20 | 50   | 46.4 | 87.37 | 210 | 17 | 29.71 |
| 20/02/2020<br>11:50 | 50   | 46.4 | 87.37 | 210 | 17 | 29.68 |
| 20/02/2020<br>12:20 | 50   | 46.4 | 87.37 | 210 | 18 | 29.68 |
| 20/02/2020<br>12:50 | 50   | 46.4 | 87.37 | 220 | 20 | 29.65 |

|                     |      |      |       |     |    |       |
|---------------------|------|------|-------|-----|----|-------|
| 20/02/2020<br>13:20 | 46.4 | 42.8 | 87.19 | 260 | 17 | 29.71 |
| 20/02/2020<br>13:50 | 46.4 | 41   | 81.34 | 280 | 18 | 29.74 |
| 20/02/2020<br>14:20 | 44.6 | 39.2 | 81.2  | 290 | 19 | 29.8  |
| 20/02/2020<br>14:50 | 42.8 | 37.4 | 81.07 | 280 | 12 | 29.8  |
| 20/02/2020<br>15:20 | 44.6 | 37.4 | 75.68 | 270 | 13 | 29.83 |
| 20/02/2020<br>15:50 | 44.6 | 37.4 | 75.68 | 270 | 15 | 29.85 |
| 20/02/2020<br>16:20 | 44.6 | 35.6 | 70.48 | 260 | 17 | 29.85 |
| 20/02/2020<br>16:50 | 42.8 | 35.6 | 75.5  | 280 | 15 | 29.88 |
| 20/02/2020<br>17:20 | 42.8 | 35.6 | 75.5  | 270 | 12 | 29.91 |
| 20/02/2020<br>17:50 | 41   | 33.8 | 75.33 | 270 | 12 | 29.97 |
| 20/02/2020<br>18:20 | 41   | 32   | 70.08 | 270 | 12 | 30    |
| 20/02/2020<br>18:50 | 41   | 32   | 70.08 | 270 | 15 | 30.03 |
| 20/02/2020<br>19:20 | 41   | 30.2 | 65.16 | 270 | 13 | 30.03 |
| 20/02/2020<br>19:50 | 41   | 30.2 | 65.16 | 270 | 11 | 30.06 |
| 20/02/2020<br>20:20 | 41   | 32   | 70.08 | 260 | 12 | 30.09 |
| 20/02/2020<br>20:50 | 41   | 32   | 70.08 | 260 | 14 | 30.09 |
| 20/02/2020<br>21:20 | 41   | 30.2 | 65.16 | 260 | 12 | 30.12 |
| 20/02/2020<br>21:50 | 41   | 32   | 70.08 | 250 | 14 | 30.12 |
| 20/02/2020<br>22:20 | 39.2 | 32   | 75.16 | 250 | 13 | 30.15 |
| 20/02/2020<br>22:50 | 41   | 32   | 70.08 | 250 | 14 | 30.15 |
| 20/02/2020<br>23:20 | 39.2 | 32   | 75.16 | 260 | 13 | 30.18 |
| 20/02/2020<br>23:50 | 39.2 | 32   | 75.16 | 240 | 12 | 30.18 |
| 21/02/2020<br>00:20 | 39.2 | 32   | 75.16 | 240 | 12 | 30.18 |
| 21/02/2020<br>00:50 | 39.2 | 32   | 75.16 | 240 | 10 | 30.21 |

|                     |      |      |       |     |    |       |
|---------------------|------|------|-------|-----|----|-------|
| 21/02/2020<br>01:20 | 41   | 32   | 70.08 | 240 | 12 | 30.21 |
| 21/02/2020<br>01:50 | 39.2 | 32   | 75.16 | 240 | 10 | 30.21 |
| 21/02/2020<br>02:20 | 39.2 | 32   | 75.16 | 240 | 8  | 30.21 |
| 21/02/2020<br>02:50 | 39.2 | 32   | 75.16 | 240 | 10 | 30.24 |
| 21/02/2020<br>03:20 | 39.2 | 33.8 | 80.79 | 250 | 11 | 30.24 |
| 21/02/2020<br>03:50 | 41   | 33.8 | 75.33 | 250 | 11 | 30.21 |
| 21/02/2020<br>04:20 | 41   | 33.8 | 75.33 | 250 | 12 | 30.24 |
| 21/02/2020<br>04:50 | 41   | 33.8 | 75.33 | 250 | 12 | 30.24 |
| 21/02/2020<br>05:20 | 41   | 35.6 | 80.93 | 240 | 12 | 30.24 |
| 21/02/2020<br>05:50 | 41   | 35.6 | 80.93 | 240 | 11 | 30.24 |
| 21/02/2020<br>06:20 | 41   | 35.6 | 80.93 | 230 | 10 | 30.24 |
| 21/02/2020<br>06:50 | 41   | 35.6 | 80.93 | 230 | 11 | 30.24 |
| 21/02/2020<br>07:20 | 41   | 35.6 | 80.93 | 220 | 10 | 30.21 |
| 21/02/2020<br>07:50 | 41   | 35.6 | 80.93 | 220 | 12 | 30.21 |
| 21/02/2020<br>08:20 | 42.8 | 35.6 | 75.5  | 220 | 11 | 30.21 |
| 21/02/2020<br>08:50 | 44.6 | 37.4 | 75.68 | 220 | 12 | 30.24 |
| 21/02/2020<br>09:20 | 44.6 | 37.4 | 75.68 | 230 | 15 | 30.24 |
| 21/02/2020<br>09:50 | 46.4 | 37.4 | 70.68 | 230 | 15 | 30.24 |
| 21/02/2020<br>10:20 | 48.2 | 37.4 | 66.05 | 240 | 17 | 30.24 |
| 21/02/2020<br>10:50 | 48.2 | 37.4 | 66.05 | 240 | 19 | 30.21 |
| 21/02/2020<br>11:20 | 48.2 | 37.4 | 66.05 | 230 | 18 | 30.21 |
| 21/02/2020<br>11:50 | 50   | 37.4 | 61.76 | 240 | 17 | 30.21 |
| 21/02/2020<br>12:20 | 50   | 37.4 | 61.76 | 240 | 19 | 30.21 |
| 21/02/2020<br>12:50 | 50   | 37.4 | 61.76 | 250 | 19 | 30.18 |

|                     |      |      |       |     |    |       |
|---------------------|------|------|-------|-----|----|-------|
| 21/02/2020<br>13:20 | 50   | 39.2 | 66.27 | 250 | 18 | 30.18 |
| 21/02/2020<br>13:50 | 51.8 | 39.2 | 61.99 | 240 | 18 | 30.18 |
| 21/02/2020<br>14:20 | 51.8 | 39.2 | 61.99 | 240 | 16 | 30.15 |
| 21/02/2020<br>14:50 | 51.8 | 39.2 | 61.99 | 240 | 18 | 30.15 |
| 21/02/2020<br>15:20 | 51.8 | 39.2 | 61.99 | 240 | 18 | 30.15 |
| 21/02/2020<br>15:50 | 51.8 | 39.2 | 61.99 | 240 | 19 | 30.15 |
| 21/02/2020<br>16:20 | 50   | 39.2 | 66.27 | 240 | 16 | 30.15 |
| 21/02/2020<br>16:50 | 50   | 39.2 | 66.27 | 230 | 17 | 30.15 |
| 21/02/2020<br>17:20 | 50   | 39.2 | 66.27 | 230 | 16 | 30.15 |
| 21/02/2020<br>17:50 | 50   | 41   | 71.07 | 230 | 18 | 30.12 |
| 21/02/2020<br>18:20 | 50   | 41   | 71.07 | 230 | 16 | 30.15 |
| 21/02/2020<br>18:50 | 50   | 39.2 | 66.27 | 230 | 17 | 30.15 |
| 21/02/2020<br>19:20 | 50   | 39.2 | 66.27 | 230 | 18 | 30.15 |
| 21/02/2020<br>19:50 | 50   | 41   | 71.07 | 230 | 20 | 30.12 |
| 21/02/2020<br>20:20 | 50   | 39.2 | 66.27 | 240 | 21 | 30.12 |
| 21/02/2020<br>20:50 | 50   | 39.2 | 66.27 | 240 | 20 | 30.12 |
| 21/02/2020<br>21:20 | 50   | 39.2 | 66.27 | 240 | 21 | 30.09 |
| 21/02/2020<br>21:50 | 50   | 41   | 71.07 | 240 | 22 | 30.12 |
| 21/02/2020<br>22:20 | 50   | 39.2 | 66.27 | 240 | 22 | 30.09 |
| 21/02/2020<br>22:50 | 50   | 41   | 71.07 | 240 | 19 | 30.12 |
| 21/02/2020<br>23:20 | 50   | 39.2 | 66.27 | 230 | 22 | 30.09 |
| 21/02/2020<br>23:50 | 50   | 41   | 71.07 | 230 | 21 | 30.06 |
| 22/02/2020<br>00:20 | 50   | 39.2 | 66.27 | 230 | 21 | 30.06 |
| 22/02/2020<br>00:50 | 50   | 41   | 71.07 | 230 | 20 | 30.03 |



|                     |      |      |       |     |    |       |
|---------------------|------|------|-------|-----|----|-------|
| 22/02/2020<br>01:20 | 48.2 | 39.2 | 70.88 | 230 | 17 | 30.03 |
| 22/02/2020<br>01:50 | 48.2 | 41   | 76.01 | 230 | 18 | 30    |
| 22/02/2020<br>02:20 | 48.2 | 41   | 76.01 | 230 | 22 | 30    |
| 22/02/2020<br>02:50 | 50   | 41   | 71.07 | 240 | 18 | 30    |
| 22/02/2020<br>03:20 | 50   | 41   | 71.07 | 230 | 17 | 30    |
| 22/02/2020<br>03:50 | 50   | 41   | 71.07 | 230 | 18 | 29.97 |
| 22/02/2020<br>04:20 | 50   | 41   | 71.07 | 230 | 17 | 29.97 |
| 22/02/2020<br>04:50 | 50   | 42.8 | 76.18 | 240 | 19 | 29.97 |
| 22/02/2020<br>05:20 | 50   | 42.8 | 76.18 | 240 | 18 | 29.97 |
| 22/02/2020<br>05:50 | 50   | 44.6 | 81.61 | 230 | 17 | 29.97 |
| 22/02/2020<br>06:20 | 50   | 44.6 | 81.61 | 230 | 15 | 29.97 |
| 22/02/2020<br>06:50 | 51.8 | 44.6 | 76.34 | 240 | 17 | 30    |
| 22/02/2020<br>07:20 | 51.8 | 44.6 | 76.34 | 230 | 19 | 30    |
| 22/02/2020<br>07:50 | 51.8 | 44.6 | 76.34 | 230 | 19 | 29.97 |
| 22/02/2020<br>08:20 | 51.8 | 46.4 | 81.74 | 230 | 19 | 30    |
| 22/02/2020<br>08:50 | 53.6 | 46.4 | 76.5  | 230 | 20 | 30    |
| 22/02/2020<br>09:20 | 51.8 | 46.4 | 81.74 | 230 | 17 | 30    |
| 22/02/2020<br>09:50 | 53.6 | 48.2 | 81.87 | 240 | 17 | 30    |
| 22/02/2020<br>10:20 | 53.6 | 46.4 | 76.5  | 260 | 22 | 30.03 |
| 22/02/2020<br>10:50 | 55.4 | 46.4 | 71.64 | 260 | 19 | 30.03 |
| 22/02/2020<br>11:20 | 55.4 | 42.8 | 62.46 | 270 | 20 | 30.06 |
| 22/02/2020<br>11:50 | 55.4 | 41   | 58.27 | 260 | 26 | 30.06 |
| 22/02/2020<br>12:20 | 55.4 | 41   | 58.27 | 260 | 21 | 30.06 |
| 22/02/2020<br>12:50 | 57.2 | 41   | 54.6  | 260 | 23 | 30.06 |

|                     |      |      |       |     |    |       |
|---------------------|------|------|-------|-----|----|-------|
| 22/02/2020<br>13:20 | 57.2 | 41   | 54.6  | 280 | 25 | 30.06 |
| 22/02/2020<br>13:50 | 55.4 | 41   | 58.27 | 270 | 25 | 30.06 |
| 22/02/2020<br>14:20 | 55.4 | 41   | 58.27 | 270 | 23 | 30.09 |
| 22/02/2020<br>14:50 | 53.6 | 39.2 | 58.02 | 270 | 23 | 30.09 |
| 22/02/2020<br>15:20 | 53.6 | 39.2 | 58.02 | 270 | 22 | 30.09 |
| 22/02/2020<br>15:50 | 53.6 | 41   | 62.23 | 270 | 24 | 30.12 |
| 22/02/2020<br>16:20 | 51.8 | 41   | 66.48 | 270 | 23 | 30.12 |
| 22/02/2020<br>16:50 | 51.8 | 41   | 66.48 | 260 | 18 | 30.12 |
| 22/02/2020<br>17:20 | 51.8 | 41   | 66.48 | 270 | 25 | 30.15 |
| 22/02/2020<br>17:50 | 51.8 | 39.2 | 61.99 | 260 | 19 | 30.15 |
| 22/02/2020<br>18:20 | 51.8 | 39.2 | 61.99 | 260 | 18 | 30.15 |
| 22/02/2020<br>18:50 | 51.8 | 39.2 | 61.99 | 260 | 17 | 30.15 |
| 22/02/2020<br>19:20 | 51.8 | 39.2 | 61.99 | 260 | 20 | 30.15 |
| 22/02/2020<br>19:50 | 50   | 39.2 | 66.27 | 260 | 19 | 30.15 |
| 22/02/2020<br>20:20 | 50   | 41   | 71.07 | 260 | 16 | 30.18 |
| 22/02/2020<br>20:50 | 48.2 | 41   | 76.01 | 250 | 18 | 30.18 |
| 22/02/2020<br>21:20 | 50   | 41   | 71.07 | 250 | 15 | 30.15 |
| 22/02/2020<br>21:50 | 50   | 41   | 71.07 | 240 | 15 | 30.15 |
| 22/02/2020<br>22:20 | 50   | 41   | 71.07 | 240 | 15 | 30.15 |
| 22/02/2020<br>22:50 | 50   | 41   | 71.07 | 240 | 13 | 30.15 |
| 22/02/2020<br>23:20 | 48.2 | 41   | 76.01 | 240 | 12 | 30.15 |
| 22/02/2020<br>23:50 | 50   | 42.8 | 76.18 | 240 | 11 | 30.15 |
| 23/02/2020<br>00:20 | 50   | 42.8 | 76.18 | 230 | 11 | 30.12 |
| 23/02/2020<br>00:50 | 50   | 41   | 71.07 | 240 | 16 | 30.09 |

|                     |      |      |       |     |    |       |
|---------------------|------|------|-------|-----|----|-------|
| 23/02/2020<br>01:20 | 50   | 41   | 71.07 | 230 | 13 | 30.09 |
| 23/02/2020<br>01:50 | 50   | 42.8 | 76.18 | 220 | 11 | 30.06 |
| 23/02/2020<br>02:20 | 48.2 | 44.6 | 87.28 | 200 | 12 | 30    |
| 23/02/2020<br>02:50 | 48.2 | 44.6 | 87.28 | 200 | 11 | 29.97 |
| 23/02/2020<br>03:20 | 50   | 48.2 | 93.5  | 210 | 14 | 29.94 |
| 23/02/2020<br>03:50 | 51.8 | 48.2 | 87.47 | 220 | 17 | 29.88 |
| 23/02/2020<br>04:20 | 53.6 | 50   | 87.56 | 230 | 19 | 29.85 |
| 23/02/2020<br>04:50 | 53.6 | 50   | 87.56 | 240 | 21 | 29.85 |
| 23/02/2020<br>05:20 | 55.4 | 50   | 81.99 | 240 | 23 | 29.85 |
| 23/02/2020<br>05:50 | 53.6 | 50   | 87.56 | 230 | 23 | 29.83 |
| 23/02/2020<br>06:20 | 53.6 | 50   | 87.56 | 240 | 19 | 29.83 |
| 23/02/2020<br>06:50 | 53.6 | 50   | 87.56 | 240 | 21 | 29.85 |
| 23/02/2020<br>07:20 | 53.6 | 50   | 87.56 | 240 | 20 | 29.85 |
| 23/02/2020<br>07:50 | 55.4 | 50   | 81.99 | 240 | 21 | 29.85 |
| 23/02/2020<br>08:20 | 53.6 | 50   | 87.56 | 240 | 22 | 29.85 |
| 23/02/2020<br>08:50 | 55.4 | 50   | 81.99 | 240 | 22 | 29.83 |
| 23/02/2020<br>09:20 | 55.4 | 50   | 81.99 | 250 | 21 | 29.85 |
| 23/02/2020<br>09:50 | 55.4 | 51.8 | 87.65 | 250 | 20 | 29.85 |
| 23/02/2020<br>10:20 | 55.4 | 51.8 | 87.65 | 250 | 20 | 29.88 |
| 23/02/2020<br>10:50 | 57.2 | 50   | 76.82 | 250 | 24 | 29.88 |
| 23/02/2020<br>11:20 | 59   | 50   | 72.01 | 260 | 24 | 29.88 |
| 23/02/2020<br>11:50 | 57.2 | 50   | 76.82 | 270 | 25 | 29.91 |
| 23/02/2020<br>12:20 | 59   | 48.2 | 67.33 | 270 | 23 | 29.91 |
| 23/02/2020<br>12:50 | 57.2 | 48.2 | 71.83 | 280 | 23 | 29.94 |

|                     |      |      |       |     |    |       |
|---------------------|------|------|-------|-----|----|-------|
| 23/02/2020<br>13:20 | 53.6 | 48.2 | 81.87 | 290 | 13 | 29.97 |
| 23/02/2020<br>13:50 | 55.4 | 46.4 | 71.64 | 300 | 15 | 30    |
| 23/02/2020<br>14:20 | 55.4 | 41   | 58.27 | 300 | 18 | 30.03 |
| 23/02/2020<br>14:50 | 55.4 | 41   | 58.27 | 320 | 13 | 30.03 |
| 23/02/2020<br>15:20 | 53.6 | 37.4 | 54.07 | 300 | 11 | 30.06 |
| 23/02/2020<br>15:50 | 51.8 | 35.6 | 53.81 | 310 | 11 | 30.09 |
| 23/02/2020<br>16:20 | 51.8 | 35.6 | 53.81 | 310 | 8  | 30.12 |
| 23/02/2020<br>16:50 | 50   | 35.6 | 57.52 | 290 | 9  | 30.15 |
| 23/02/2020<br>17:20 | 50   | 33.8 | 53.54 | 300 | 7  | 30.15 |
| 23/02/2020<br>17:50 | 50   | 33.8 | 53.54 | 310 | 7  | 30.18 |
| 23/02/2020<br>18:20 | 48.2 | 33.8 | 57.26 | 300 | 5  | 30.21 |
| 23/02/2020<br>18:50 | 48.2 | 33.8 | 57.26 | 290 | 3  | 30.21 |
| 23/02/2020<br>19:20 | 48.2 | 33.8 | 57.26 | 300 | 3  | 30.21 |
| 23/02/2020<br>19:50 | 46.4 | 33.8 | 61.28 | M   | 2  | 30.24 |
| 23/02/2020<br>20:20 | 46.4 | 33.8 | 61.28 | 300 | 4  | 30.24 |
| 23/02/2020<br>20:50 | 46.4 | 33.8 | 61.28 | 290 | 3  | 30.24 |
| 23/02/2020<br>21:20 | 46.4 | 35.6 | 65.83 | 280 | 4  | 30.24 |
| 23/02/2020<br>21:50 | 46.4 | 35.6 | 65.83 | 280 | 6  | 30.24 |
| 23/02/2020<br>22:20 | 46.4 | 33.8 | 61.28 | 280 | 6  | 30.24 |
| 23/02/2020<br>22:50 | 46.4 | 33.8 | 61.28 | 260 | 5  | 30.24 |
| 23/02/2020<br>23:20 | 44.6 | 35.6 | 70.48 | 190 | 4  | 30.21 |
| 23/02/2020<br>23:50 | 46.4 | 35.6 | 65.83 | 160 | 4  | 30.21 |
| 24/02/2020<br>00:20 | 46.4 | 35.6 | 65.83 | 180 | 4  | 30.21 |
| 24/02/2020<br>00:50 | 44.6 | 35.6 | 70.48 | 140 | 3  | 30.21 |

|                     |      |      |       |     |    |       |
|---------------------|------|------|-------|-----|----|-------|
| 24/02/2020<br>01:20 | 44.6 | 35.6 | 70.48 | 160 | 6  | 30.18 |
| 24/02/2020<br>01:50 | 44.6 | 35.6 | 70.48 | 180 | 6  | 30.18 |
| 24/02/2020<br>02:20 | 44.6 | 37.4 | 75.68 | 140 | 7  | 30.15 |
| 24/02/2020<br>02:50 | 44.6 | 37.4 | 75.68 | 130 | 8  | 30.12 |
| 24/02/2020<br>03:20 | 42.8 | 39.2 | 86.99 | 130 | 8  | 30.09 |
| 24/02/2020<br>03:50 | 42.8 | 39.2 | 86.99 | 120 | 8  | 30.06 |
| 24/02/2020<br>04:20 | 42.8 | 41   | 93.3  | 130 | 7  | 30.03 |
| 24/02/2020<br>04:50 | 42.8 | 41   | 93.3  | 130 | 8  | 30    |
| 24/02/2020<br>05:20 | 44.6 | 42.8 | 93.35 | 150 | 9  | 29.97 |
| 24/02/2020<br>05:50 | 44.6 | 42.8 | 93.35 | 170 | 10 | 29.94 |
| 24/02/2020<br>06:20 | 46.4 | 44.6 | 93.4  | 190 | 9  | 29.91 |
| 24/02/2020<br>06:50 | 48.2 | 46.4 | 93.45 | 210 | 10 | 29.88 |
| 24/02/2020<br>07:20 | 50   | 46.4 | 87.37 | 220 | 15 | 29.85 |
| 24/02/2020<br>07:50 | 51.8 | 46.4 | 81.74 | 230 | 18 | 29.85 |
| 24/02/2020<br>08:20 | 51.8 | 46.4 | 81.74 | 230 | 18 | 29.83 |
| 24/02/2020<br>08:50 | 51.8 | 46.4 | 81.74 | 230 | 19 | 29.83 |
| 24/02/2020<br>09:20 | 51.8 | 46.4 | 81.74 | 230 | 20 | 29.8  |
| 24/02/2020<br>09:50 | 51.8 | 48.2 | 87.47 | 230 | 16 | 29.8  |
| 24/02/2020<br>10:20 | 51.8 | 48.2 | 87.47 | 220 | 17 | 29.8  |
| 24/02/2020<br>10:50 | 51.8 | 48.2 | 87.47 | 230 | 19 | 29.77 |
| 24/02/2020<br>11:20 | 51.8 | 48.2 | 87.47 | 230 | 21 | 29.77 |
| 24/02/2020<br>11:50 | 51.8 | 48.2 | 87.47 | 230 | 18 | 29.74 |
| 24/02/2020<br>12:20 | 51.8 | 48.2 | 87.47 | 240 | 19 | 29.74 |
| 24/02/2020<br>12:50 | 51.8 | 48.2 | 87.47 | 230 | 17 | 29.71 |

|                     |      |      |       |     |    |       |
|---------------------|------|------|-------|-----|----|-------|
| 24/02/2020<br>13:20 | 51.8 | 48.2 | 87.47 | 230 | 17 | 29.71 |
| 24/02/2020<br>13:50 | 51.8 | 48.2 | 87.47 | 230 | 17 | 29.71 |
| 24/02/2020<br>14:20 | 51.8 | 48.2 | 87.47 | 230 | 19 | 29.68 |
| 24/02/2020<br>14:50 | 53.6 | 48.2 | 81.87 | 230 | 20 | 29.68 |
| 24/02/2020<br>15:20 | 53.6 | 48.2 | 81.87 | 230 | 16 | 29.65 |
| 24/02/2020<br>15:50 | 53.6 | 48.2 | 81.87 | 240 | 18 | 29.65 |
| 24/02/2020<br>16:20 | 53.6 | 48.2 | 81.87 | 240 | 19 | 29.65 |
| 24/02/2020<br>16:50 | 53.6 | 48.2 | 81.87 | 240 | 15 | 29.65 |
| 24/02/2020<br>17:20 | 53.6 | 48.2 | 81.87 | 240 | 17 | 29.65 |
| 24/02/2020<br>17:50 | 53.6 | 46.4 | 76.5  | 250 | 17 | 29.65 |
| 24/02/2020<br>18:20 | 51.8 | 44.6 | 76.34 | 270 | 16 | 29.68 |
| 24/02/2020<br>18:50 | 51.8 | 42.8 | 71.26 | 260 | 20 | 29.68 |
| 24/02/2020<br>19:20 | 51.8 | 42.8 | 71.26 | 250 | 15 | 29.68 |
| 24/02/2020<br>19:50 | 50   | 41   | 71.07 | 250 | 16 | 29.68 |
| 24/02/2020<br>20:20 | 50   | 41   | 71.07 | 250 | 16 | 29.68 |
| 24/02/2020<br>20:50 | 48.2 | 41   | 76.01 | 260 | 16 | 29.71 |
| 24/02/2020<br>21:20 | 48.2 | 41   | 76.01 | 270 | 13 | 29.68 |
| 24/02/2020<br>21:50 | 48.2 | 41   | 76.01 | 260 | 10 | 29.68 |
| 24/02/2020<br>22:20 | 46.4 | 39.2 | 75.84 | 260 | 11 | 29.71 |
| 24/02/2020<br>22:50 | 46.4 | 39.2 | 75.84 | 250 | 13 | 29.68 |
| 24/02/2020<br>23:20 | 44.6 | 37.4 | 75.68 | 260 | 14 | 29.68 |
| 24/02/2020<br>23:50 | 44.6 | 37.4 | 75.68 | 250 | 12 | 29.68 |
| 25/02/2020<br>00:20 | 44.6 | 37.4 | 75.68 | 240 | 10 | 29.68 |
| 25/02/2020<br>00:50 | 44.6 | 37.4 | 75.68 | 240 | 10 | 29.68 |

|                     |      |      |       |     |    |       |
|---------------------|------|------|-------|-----|----|-------|
| 25/02/2020<br>01:20 | 44.6 | 37.4 | 75.68 | 250 | 11 | 29.68 |
| 25/02/2020<br>01:50 | 44.6 | 37.4 | 75.68 | 250 | 12 | 29.68 |
| 25/02/2020<br>02:20 | 44.6 | 37.4 | 75.68 | 240 | 11 | 29.65 |
| 25/02/2020<br>02:50 | 42.8 | 37.4 | 81.07 | 240 | 10 | 29.65 |
| 25/02/2020<br>03:20 | 42.8 | 37.4 | 81.07 | 240 | 11 | 29.65 |
| 25/02/2020<br>03:50 | 42.8 | 35.6 | 75.5  | 250 | 11 | 29.65 |
| 25/02/2020<br>04:20 | 42.8 | 35.6 | 75.5  | 250 | 11 | 29.65 |
| 25/02/2020<br>04:50 | 41   | 35.6 | 80.93 | 250 | 11 | 29.65 |
| 25/02/2020<br>05:20 | 41   | 35.6 | 80.93 | 240 | 11 | 29.65 |
| 25/02/2020<br>05:50 | 41   | 35.6 | 80.93 | 240 | 10 | 29.62 |
| 25/02/2020<br>06:20 | 41   | 35.6 | 80.93 | 230 | 12 | 29.62 |
| 25/02/2020<br>06:50 | 41   | 35.6 | 80.93 | 240 | 11 | 29.62 |
| 25/02/2020<br>07:20 | 42.8 | 37.4 | 81.07 | 240 | 11 | 29.62 |
| 25/02/2020<br>07:50 | 42.8 | 35.6 | 75.5  | 250 | 14 | 29.62 |
| 25/02/2020<br>08:20 | 42.8 | 35.6 | 75.5  | 250 | 13 | 29.59 |
| 25/02/2020<br>08:50 | 42.8 | 35.6 | 75.5  | 250 | 16 | 29.59 |
| 25/02/2020<br>09:20 | 44.6 | 35.6 | 70.48 | 250 | 15 | 29.59 |
| 25/02/2020<br>09:50 | 44.6 | 35.6 | 70.48 | 250 | 16 | 29.56 |
| 25/02/2020<br>10:20 | 44.6 | 35.6 | 70.48 | 260 | 14 | 29.56 |
| 25/02/2020<br>10:50 | 46.4 | 37.4 | 70.68 | 260 | 17 | 29.56 |
| 25/02/2020<br>11:20 | 46.4 | 35.6 | 65.83 | 250 | 15 | 29.56 |
| 25/02/2020<br>11:50 | 46.4 | 35.6 | 65.83 | 260 | 15 | 29.53 |
| 25/02/2020<br>12:20 | 46.4 | 33.8 | 61.28 | 270 | 16 | 29.53 |
| 25/02/2020<br>12:50 | 46.4 | 33.8 | 61.28 | 260 | 17 | 29.53 |

|                     |      |      |       |     |    |       |
|---------------------|------|------|-------|-----|----|-------|
| 25/02/2020<br>13:20 | 48.2 | 35.6 | 61.52 | 260 | 16 | 29.5  |
| 25/02/2020<br>13:50 | 46.4 | 33.8 | 61.28 | 270 | 16 | 29.47 |
| 25/02/2020<br>14:20 | 46.4 | 35.6 | 65.83 | 260 | 17 | 29.47 |
| 25/02/2020<br>14:50 | 44.6 | 35.6 | 70.48 | 240 | 13 | 29.47 |
| 25/02/2020<br>15:20 | 44.6 | 35.6 | 70.48 | 250 | 14 | 29.44 |
| 25/02/2020<br>15:50 | 44.6 | 35.6 | 70.48 | 240 | 10 | 29.44 |
| 25/02/2020<br>16:20 | 44.6 | 35.6 | 70.48 | 250 | 11 | 29.41 |
| 25/02/2020<br>16:50 | 41   | 37.4 | 86.89 | 250 | 12 | 29.44 |
| 25/02/2020<br>17:20 | 41   | 35.6 | 80.93 | 250 | 12 | 29.41 |
| 25/02/2020<br>17:50 | 41   | 35.6 | 80.93 | 250 | 14 | 29.41 |
| 25/02/2020<br>18:20 | 39.2 | 35.6 | 86.79 | 260 | 13 | 29.41 |
| 25/02/2020<br>18:50 | 39.2 | 33.8 | 80.79 | 260 | 11 | 29.41 |
| 25/02/2020<br>19:20 | 39.2 | 33.8 | 80.79 | 260 | 14 | 29.41 |
| 25/02/2020<br>19:50 | 39.2 | 33.8 | 80.79 | 260 | 15 | 29.41 |
| 25/02/2020<br>20:20 | 39.2 | 32   | 75.16 | 270 | 15 | 29.41 |
| 25/02/2020<br>20:50 | 39.2 | 32   | 75.16 | 270 | 15 | 29.41 |
| 25/02/2020<br>21:20 | 39.2 | 32   | 75.16 | 270 | 14 | 29.41 |
| 25/02/2020<br>21:50 | 39.2 | 32   | 75.16 | 270 | 15 | 29.41 |
| 25/02/2020<br>22:20 | 37.4 | 32   | 80.65 | 270 | 13 | 29.44 |
| 25/02/2020<br>22:50 | 37.4 | 32   | 80.65 | 270 | 12 | 29.44 |
| 25/02/2020<br>23:20 | 37.4 | 32   | 80.65 | 270 | 12 | 29.44 |
| 25/02/2020<br>23:50 | 37.4 | 32   | 80.65 | 270 | 11 | 29.44 |
| 26/02/2020<br>00:20 | 37.4 | 32   | 80.65 | 270 | 11 | 29.44 |
| 26/02/2020<br>00:50 | 37.4 | 30.2 | 74.98 | 270 | 11 | 29.47 |



|                     |      |      |       |     |    |       |
|---------------------|------|------|-------|-----|----|-------|
| 26/02/2020<br>01:20 | 37.4 | 30.2 | 74.98 | 270 | 11 | 29.47 |
| 26/02/2020<br>01:50 | 35.6 | 30.2 | 80.51 | 270 | 12 | 29.47 |
| 26/02/2020<br>02:20 | 35.6 | 30.2 | 80.51 | 270 | 11 | 29.47 |
| 26/02/2020<br>02:50 | 35.6 | 30.2 | 80.51 | 270 | 11 | 29.47 |
| 26/02/2020<br>03:20 | 35.6 | 30.2 | 80.51 | 270 | 11 | 29.5  |
| 26/02/2020<br>03:50 | 35.6 | 30.2 | 80.51 | 260 | 11 | 29.5  |
| 26/02/2020<br>04:20 | 35.6 | 30.2 | 80.51 | 270 | 10 | 29.5  |
| 26/02/2020<br>04:50 | 35.6 | 28.4 | 74.8  | 260 | 11 | 29.5  |
| 26/02/2020<br>05:20 | 35.6 | 28.4 | 74.8  | 270 | 10 | 29.53 |
| 26/02/2020<br>05:50 | 35.6 | 28.4 | 74.8  | 260 | 11 | 29.53 |
| 26/02/2020<br>06:20 | 33.8 | 28.4 | 80.36 | 260 | 11 | 29.56 |
| 26/02/2020<br>06:50 | 35.6 | 30.2 | 80.51 | 270 | 10 | 29.56 |
| 26/02/2020<br>07:20 | 35.6 | 30.2 | 80.51 | 270 | 16 | 29.56 |
| 26/02/2020<br>07:50 | 37.4 | 30.2 | 74.98 | 270 | 13 | 29.59 |
| 26/02/2020<br>08:20 | 37.4 | 32   | 80.65 | 270 | 11 | 29.62 |
| 26/02/2020<br>08:50 | 39.2 | 32   | 75.16 | 270 | 12 | 29.62 |
| 26/02/2020<br>09:20 | 41   | 33.8 | 75.33 | 280 | 12 | 29.65 |
| 26/02/2020<br>09:50 | 42.8 | 32   | 65.38 | 290 | 13 | 29.65 |
| 26/02/2020<br>10:20 | 42.8 | 32   | 65.38 | 290 | 15 | 29.65 |
| 26/02/2020<br>10:50 | 42.8 | 32   | 65.38 | 300 | 12 | 29.68 |
| 26/02/2020<br>11:20 | 44.6 | 32   | 61.03 | 290 | 12 | 29.68 |
| 26/02/2020<br>11:50 | 44.6 | 32   | 61.03 | 290 | 14 | 29.68 |
| 26/02/2020<br>12:20 | 46.4 | 32   | 57    | 280 | 15 | 29.71 |
| 26/02/2020<br>12:50 | 46.4 | 33.8 | 61.28 | 280 | 15 | 29.71 |

|                     |      |      |       |     |    |       |
|---------------------|------|------|-------|-----|----|-------|
| 26/02/2020<br>13:20 | 46.4 | 30.2 | 53    | 290 | 15 | 29.71 |
| 26/02/2020<br>13:50 | 46.4 | 32   | 57    | 290 | 12 | 29.71 |
| 26/02/2020<br>14:20 | 46.4 | 30.2 | 53    | 290 | 12 | 29.71 |
| 26/02/2020<br>14:50 | 46.4 | 30.2 | 53    | 290 | 13 | 29.71 |
| 26/02/2020<br>15:20 | 44.6 | 33.8 | 65.61 | 320 | 8  | 29.74 |
| 26/02/2020<br>15:50 | 44.6 | 32   | 61.03 | 290 | 9  | 29.74 |
| 26/02/2020<br>16:20 | 46.4 | 30.2 | 53    | 300 | 9  | 29.77 |
| 26/02/2020<br>16:50 | 44.6 | 30.2 | 56.74 | 290 | 8  | 29.77 |
| 26/02/2020<br>17:20 | 42.8 | 30.2 | 60.79 | 270 | 10 | 29.77 |
| 26/02/2020<br>17:50 | 42.8 | 30.2 | 60.79 | 280 | 11 | 29.77 |
| 26/02/2020<br>18:20 | 41   | 28.4 | 60.54 | 270 | 11 | 29.77 |
| 26/02/2020<br>18:50 | 41   | 28.4 | 60.54 | 270 | 10 | 29.77 |
| 26/02/2020<br>19:20 | 39.2 | 28.4 | 64.93 | 280 | 7  | 29.77 |
| 26/02/2020<br>19:50 | 41   | 30.2 | 65.16 | 240 | 9  | 29.77 |
| 26/02/2020<br>20:20 | 41   | 30.2 | 65.16 | 250 | 10 | 29.77 |
| 26/02/2020<br>20:50 | 42.8 | 32   | 65.38 | 260 | 10 | 29.77 |
| 26/02/2020<br>21:20 | 41   | 32   | 70.08 | 250 | 10 | 29.74 |
| 26/02/2020<br>21:50 | 39.2 | 32   | 75.16 | 240 | 8  | 29.74 |
| 26/02/2020<br>22:20 | 39.2 | 32   | 75.16 | 220 | 7  | 29.74 |
| 26/02/2020<br>22:50 | 39.2 | 32   | 75.16 | 210 | 6  | 29.74 |
| 26/02/2020<br>23:20 | 39.2 | 32   | 75.16 | 200 | 6  | 29.71 |
| 26/02/2020<br>23:50 | 39.2 | 32   | 75.16 | 200 | 6  | 29.68 |
| 27/02/2020<br>00:20 | 39.2 | 30.2 | 69.88 | 200 | 6  | 29.68 |
| 27/02/2020<br>00:50 | 39.2 | 30.2 | 69.88 | 190 | 5  | 29.65 |

|                     |      |      |       |     |    |       |
|---------------------|------|------|-------|-----|----|-------|
| 27/02/2020<br>01:20 | 39.2 | 30.2 | 69.88 | 160 | 4  | 29.62 |
| 27/02/2020<br>01:50 | 39.2 | 30.2 | 69.88 | 160 | 5  | 29.62 |
| 27/02/2020<br>02:20 | 39.2 | 32   | 75.16 | 150 | 3  | 29.59 |
| 27/02/2020<br>02:50 | 39.2 | 32   | 75.16 | 190 | 4  | 29.56 |
| 27/02/2020<br>03:20 | 39.2 | 33.8 | 80.79 | 180 | 3  | 29.53 |
| 27/02/2020<br>03:50 | 39.2 | 35.6 | 86.79 | 160 | 3  | 29.5  |
| 27/02/2020<br>04:20 | 39.2 | 35.6 | 86.79 | 130 | 4  | 29.47 |
| 27/02/2020<br>04:50 | 37.4 | 35.6 | 93.14 | 90  | 5  | 29.44 |
| 27/02/2020<br>05:20 | 39.2 | 35.6 | 86.79 | 80  | 5  | 29.44 |
| 27/02/2020<br>05:50 | 37.4 | 35.6 | 93.14 | 110 | 8  | 29.41 |
| 27/02/2020<br>06:20 | 37.4 | 33.8 | 86.69 | 90  | 7  | 29.41 |
| 27/02/2020<br>06:50 | 37.4 | 33.8 | 86.69 | 70  | 6  | 29.38 |
| 27/02/2020<br>07:20 | 37.4 | 35.6 | 93.14 | 60  | 5  | 29.38 |
| 27/02/2020<br>07:50 | 37.4 | 33.8 | 86.69 | 30  | 5  | 29.41 |
| 27/02/2020<br>08:20 | 35.6 | 33.8 | 93.08 | 30  | 5  | 29.41 |
| 27/02/2020<br>08:50 | 35.6 | 33.8 | 93.08 | 360 | 6  | 29.41 |
| 27/02/2020<br>09:20 | 35.6 | 33.8 | 93.08 | 360 | 6  | 29.44 |
| 27/02/2020<br>09:50 | 35.6 | 33.8 | 93.08 | 350 | 6  | 29.47 |
| 27/02/2020<br>10:20 | 37.4 | 33.8 | 86.69 | 340 | 6  | 29.47 |
| 27/02/2020<br>10:50 | 39.2 | 35.6 | 86.79 | 340 | 7  | 29.5  |
| 27/02/2020<br>11:20 | 41   | 35.6 | 80.93 | 340 | 10 | 29.5  |
| 27/02/2020<br>11:50 | 41   | 33.8 | 75.33 | 320 | 11 | 29.53 |
| 27/02/2020<br>12:20 | 41   | 33.8 | 75.33 | 320 | 10 | 29.56 |
| 27/02/2020<br>12:50 | 42.8 | 33.8 | 70.28 | 320 | 12 | 29.59 |

|                     |      |      |       |     |    |       |
|---------------------|------|------|-------|-----|----|-------|
| 27/02/2020<br>13:20 | 44.6 | 32   | 61.03 | 320 | 11 | 29.59 |
| 27/02/2020<br>13:50 | 44.6 | 32   | 61.03 | 310 | 13 | 29.62 |
| 27/02/2020<br>14:20 | 44.6 | 30.2 | 56.74 | 310 | 13 | 29.65 |
| 27/02/2020<br>14:50 | 44.6 | 30.2 | 56.74 | 300 | 16 | 29.68 |
| 27/02/2020<br>15:20 | 46.4 | 28.4 | 49.24 | 310 | 14 | 29.68 |
| 27/02/2020<br>15:50 | 46.4 | 28.4 | 49.24 | 310 | 13 | 29.71 |
| 27/02/2020<br>16:20 | 46.4 | 26.6 | 45.73 | 310 | 11 | 29.74 |
| 27/02/2020<br>16:50 | 44.6 | 26.6 | 48.96 | 310 | 11 | 29.77 |
| 27/02/2020<br>17:20 | 44.6 | 26.6 | 48.96 | 300 | 9  | 29.77 |
| 27/02/2020<br>17:50 | 44.6 | 26.6 | 48.96 | 300 | 8  | 29.8  |
| 27/02/2020<br>18:20 | 44.6 | 26.6 | 48.96 | 300 | 10 | 29.83 |
| 27/02/2020<br>18:50 | 42.8 | 24.8 | 48.67 | 310 | 8  | 29.85 |
| 27/02/2020<br>19:20 | 42.8 | 26.6 | 52.45 | 300 | 5  | 29.88 |
| 27/02/2020<br>19:50 | 41   | 26.6 | 56.22 | 280 | 6  | 29.88 |
| 27/02/2020<br>20:20 | 41   | 28.4 | 60.54 | 280 | 7  | 29.91 |
| 27/02/2020<br>20:50 | 39.2 | 28.4 | 64.93 | 260 | 6  | 29.91 |
| 27/02/2020<br>21:20 | 41   | 28.4 | 60.54 | 270 | 7  | 29.94 |
| 27/02/2020<br>21:50 | 37.4 | 28.4 | 69.67 | 270 | 9  | 29.94 |
| 27/02/2020<br>22:20 | 37.4 | 28.4 | 69.67 | 280 | 8  | 29.97 |
| 27/02/2020<br>22:50 | 37.4 | 30.2 | 74.98 | 280 | 5  | 29.97 |
| 27/02/2020<br>23:20 | 37.4 | 28.4 | 69.67 | 250 | 4  | 29.97 |
| 27/02/2020<br>23:50 | 37.4 | 28.4 | 69.67 | 250 | 4  | 29.97 |

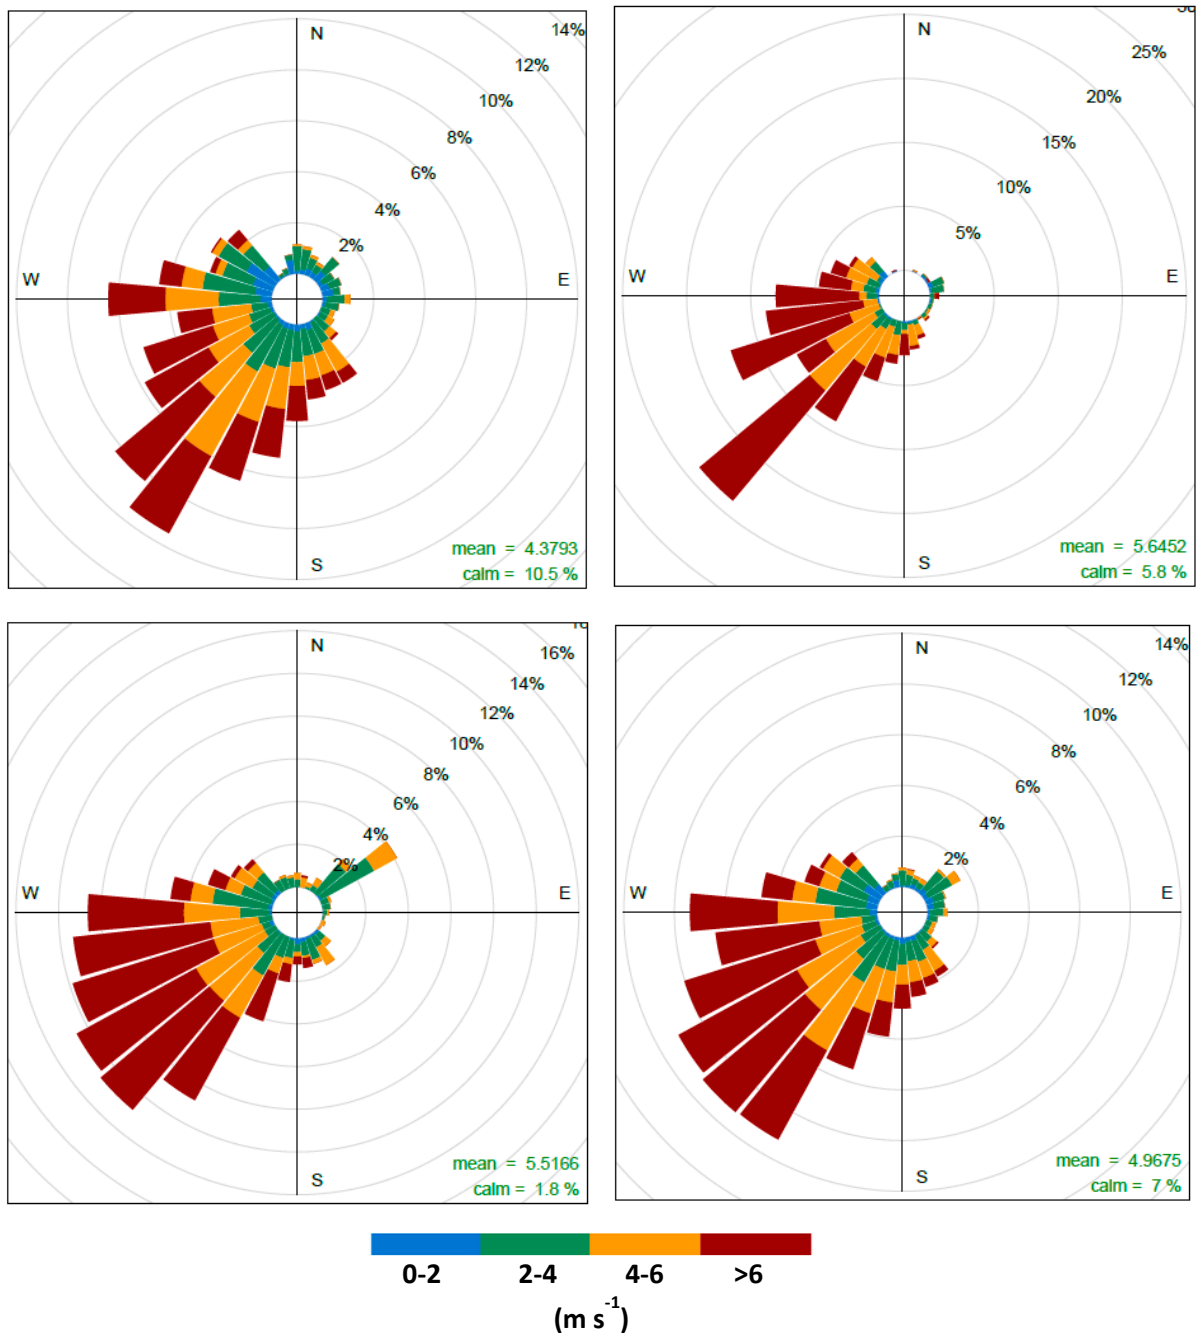

**Figure S1.** Windrose plots were obtained from the London Heathrow airport meteorological station.

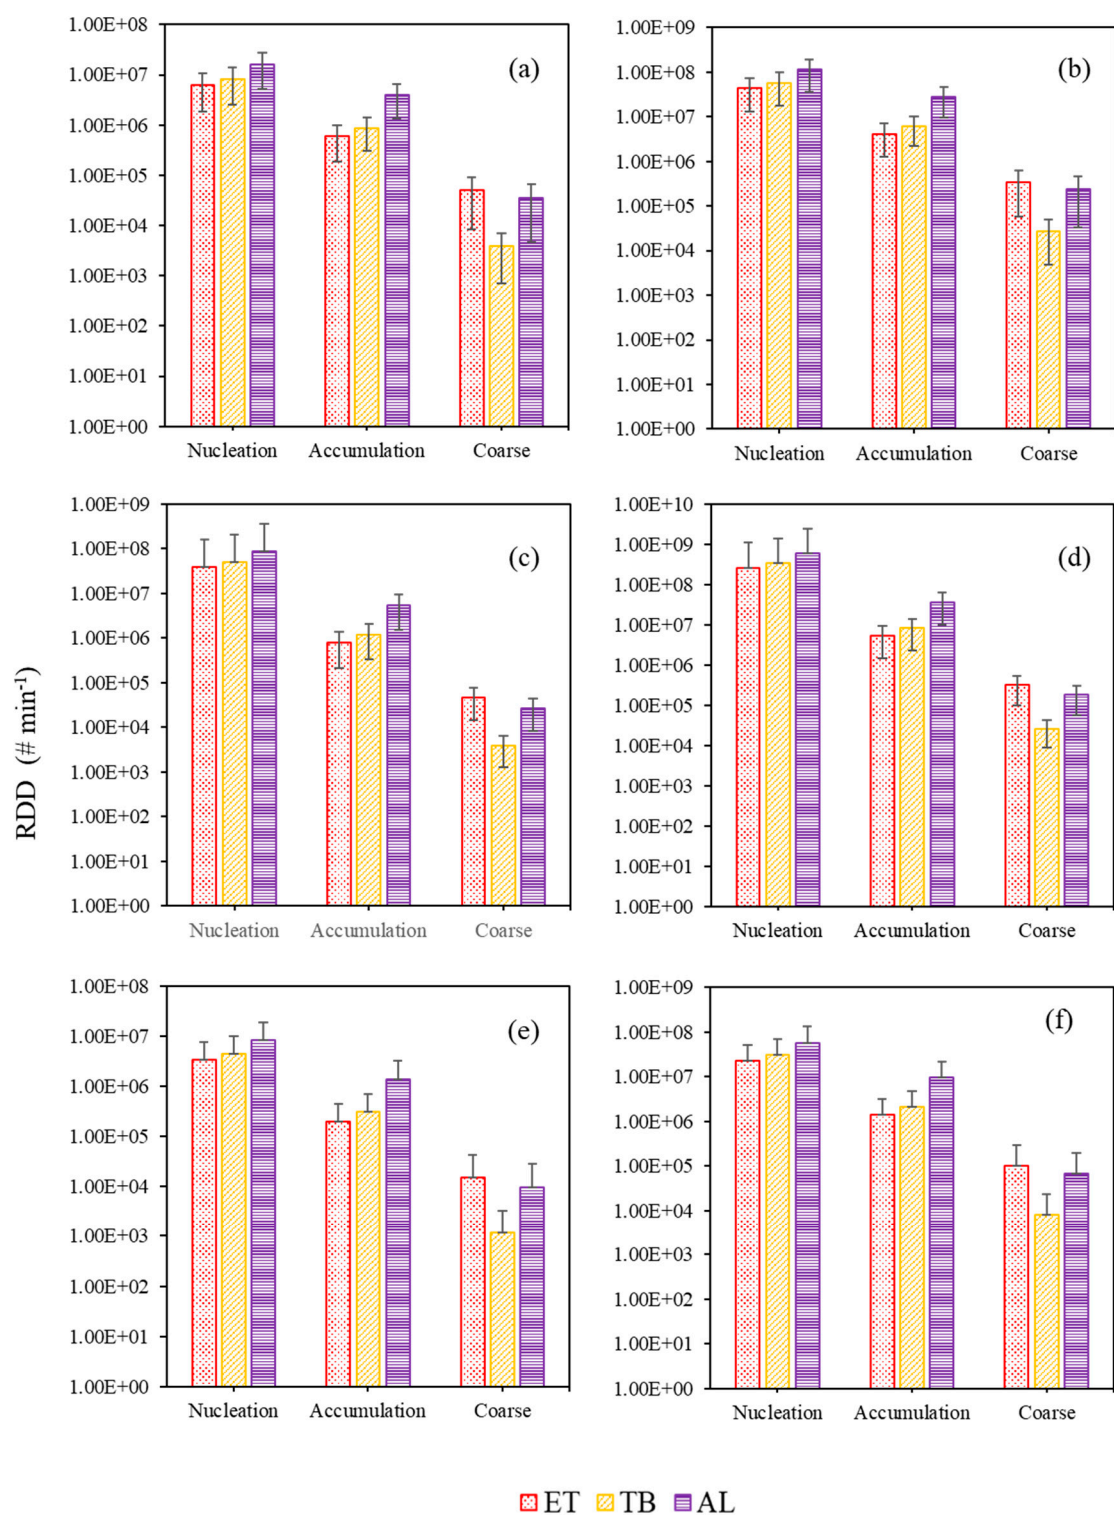

**Figure S2.** Estimated Average RDD of PM particles (females) for all the sampling sites (a) Indoor (Rest), (b) Indoor (Exercise), (c) Traffic (Rest), (d) Traffic (Exercise), (e) Park (Rest) and (f) Park (Exercise) for resting and exercise activities for all the three regions of lung morphology.

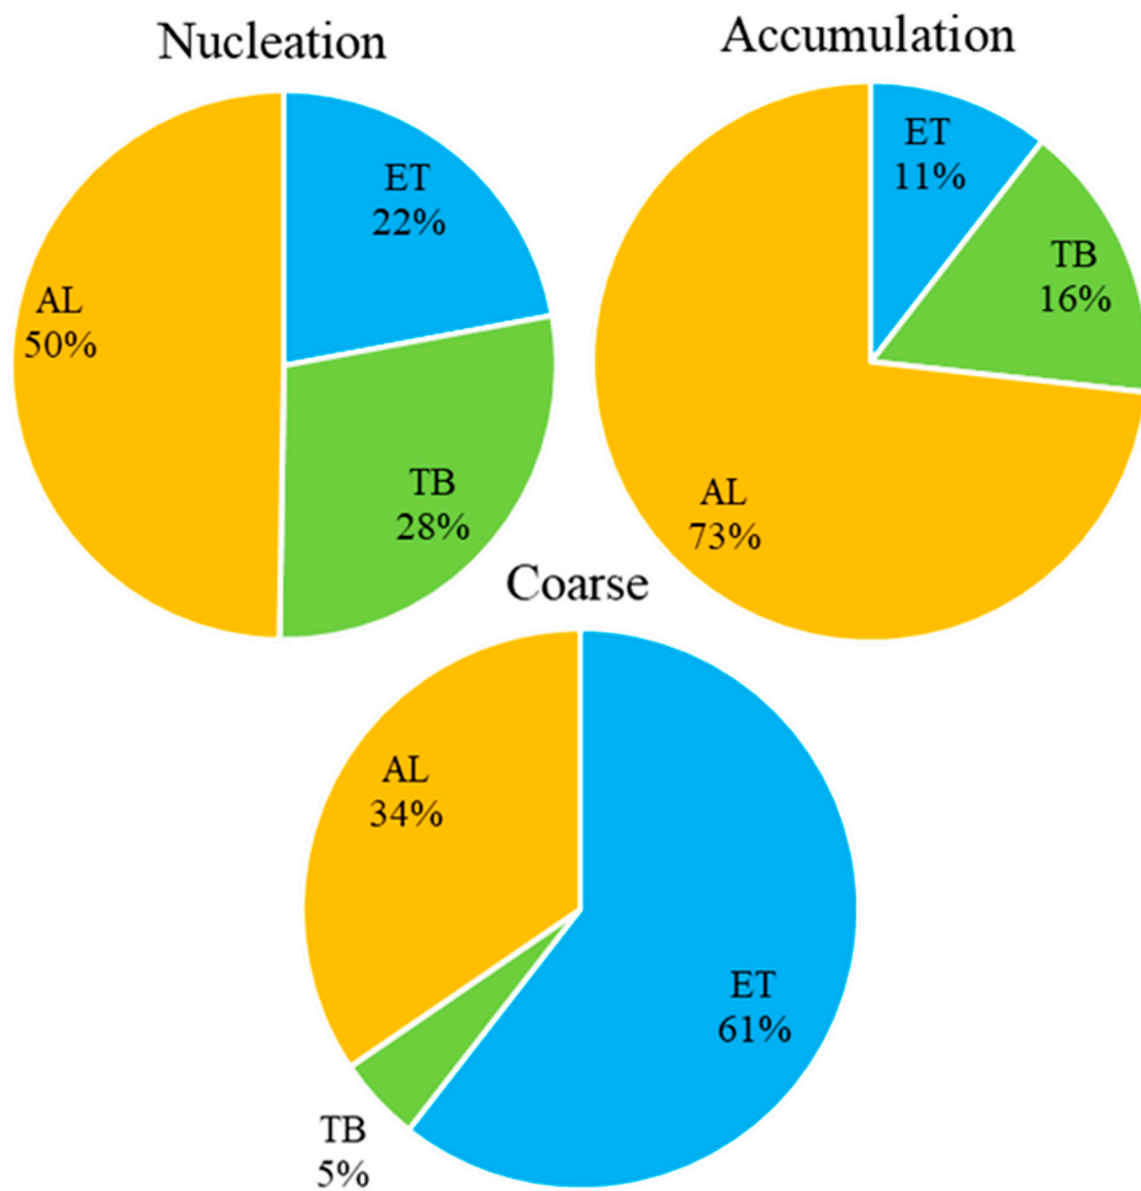

**Figure S3.** The individual particle mode contribution of respiratory deposition doses for resting and exercise activities.

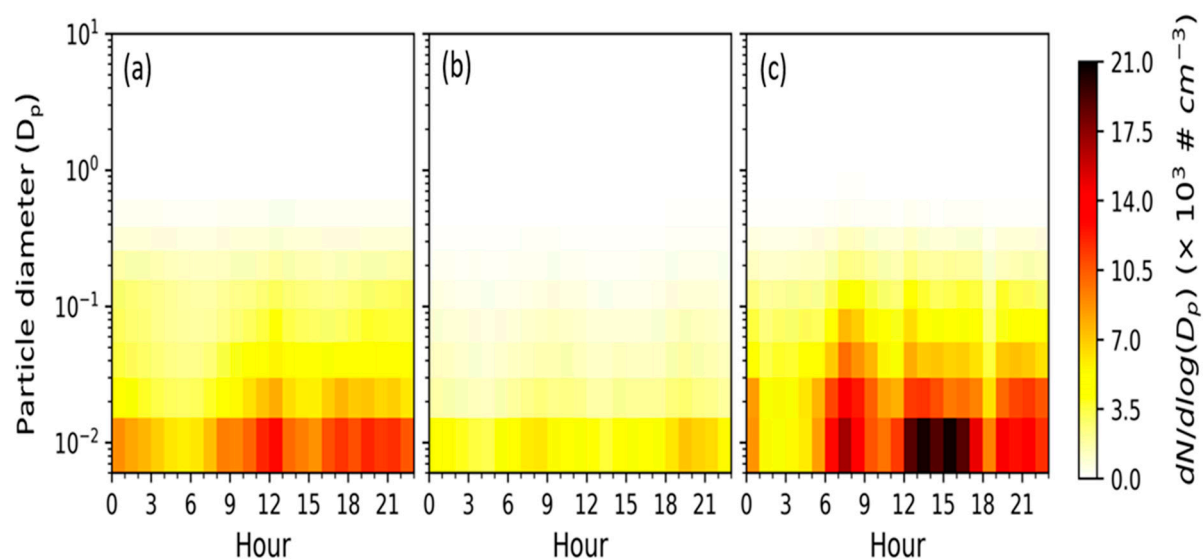

**Figure S4.** Heat map representation of particle number distribution ( $\# \text{ cm}^{-3}$ ) in different microenvironments (a) indoor, (b) park, (c) traffic intersection. X-axis shows time in hours and Y-Axis the particle diameter, and shaded colours represent  $dN/d\log(D_p)$ .
